# Supplementary material
Source: publisher site journal article supplement (https://www.dovepress.com/article/479959)
Supplement: Supplementary file 1 [file get_supplementary_file.php]

**Multiomic profiling and neuroprotective bioactivity of *Salvia* hairy root-derived extracellular vesicles in a cellular model of Parkinson's disease**

Vincenzo Vestuto1*, Marisa Conte1*, Mariapia Vietri1*, Francesca Mensitieri2, Valentina Santoro1, Anna Di Muro1, Mariaevelina Alfieri3, Maria Moros4,5, Maria Rosaria Miranda1, Chiara Amante1, Matteo Delli Carri1, Pietro Campiglia1, Fabrizio Dal Piaz2,6, Pasquale Del Gaudio1, Nunziatina De Tommasi1, Antonietta Leone1, Ornella Moltedo1, Giacomo Pepe1, Elisa Cappetta1 and Alfredo Ambrosone1

1 Department of Pharmacy, University of Salerno, 84084, Fisciano, Italy

2 Department of Medicine, Surgery and Dentistry “Scuola Medica Salernitana”, University of Salerno, 84081 Baronissi, Italy

3 Clinical Pathology, Santobono-Pausilipon Children’s Hospital, AORN, 80122 Naples, Italy.

4 Instituto de Nanociencia y Materiales de Aragón (INMA), CSIC-Universidad de Zaragoza, Zaragoza, Spain

5 Biomedical Research Networking Center in Bioengineering, Biomaterials and Nanomedicine (CIBER-BBN), Madrid, Spain

6 Operative Unit of Clinical Pharmacology, University Hospital “San Giovanni di Dio e Ruggi d’Aragona”, 84131 Salerno, Italy

* These authors contributed equally to this work

Corresponding authors: Alfredo Ambrosone, Department of Pharmacy, University of Salerno, 84084, Fisciano, Italy, Email [aambrosone@unisa.it](mailto:aambrosone@unisa.it); Elisa Cappetta, Department of Pharmacy, University of Salerno, 84084, Fisciano, Italy, Email [ecappetta@unisa.it](mailto:ecappetta@unisa.it)

| **Table S1.** List of primers used for PCR and qRT-PCR | | |  |  |
| --- | --- | --- | --- | --- |
| **Gene name** | **Gene bank ID** | **Forward primer** | **Reverse primer** | **Method** |
| *rolB* | X03433.1 | GATTCAACCATATCGGAGCG | TGAGCATGTGCTGTTTTTGG | PCR |
| *rolC* | MT514512.1 | CGACCTGTGTTCTCTTTTTCAAGC | GCACTCGCCATGCCTCACCAACTCACC | PCR |
| *virD2* | M33673.1 | ATGCCCGATCGAGCTCAAGT | CCTGACCCAAACATCTCGGCT | PCR |
| *GAPDH* | AY340484 | GCTCAGACACCATGGGGAA | AATGAAGGGGTCATTGATGGC | qRT-PCR |
| *PINK1* | NM_032409.3 | ACGTTCAGTTACGGGAGTGG | GGCTAGTCAGGAGGGAAACC | qRT-PCR |
| *PARK2* | AB245403 | CTGACACCAGCATCTTCCAG | CCAGTCATTCCTCAGCTCCT | qRT-PCR |

**Figure S1**: A) NTA measurements and EV concentration (mean ± standard deviation) of *S. dominica* HR EVs purified by dUC (dilution= 1: 800). B) SEM image showing the size and morphology of *S. dominica* HR EVs. Scale bar: 100 nm

**Table S2**. Proteins identified by proteomic analysis of *S. sclarea* HR EVs

| **Accession** | **Description** |
| --- | --- |
| PER1_ZINVI | Basic peroxidase OS=Zinnia violacea OX=34245 GN=POD1 PE=1 SV=1 |
| PER1_ARAHY | Cationic peroxidase 1 OS=Arachis hypogaea OX=3818 GN=PNC1 PE=1 SV=2 |
| ACT_MESVI | Actin OS=Mesostigma viride OX=41882 PE=3 SV=1 |
| RPOC1_MESVI | DNA-directed RNA polymerase subunit beta' OS=Mesostigma viride OX=41882 GN=rpoC1 PE=3 SV=1 |
| RT03_MAIZE | Ribosomal protein S3, mitochondrial OS=Zea mays OX=4577 GN=RPS3 PE=3 SV=1 |
| PUB25_ARATH | U-box domain-containing protein 25 OS=Arabidopsis thaliana OX=3702 GN=PUB25 PE=2 SV=1 |
| EF1A_SOYBN | Elongation factor 1-alpha OS=Glycine max OX=3847 GN=TEFS1 PE=3 SV=2 |
| CLPB2_ORYSJ | Chaperone protein ClpB2, chloroplastic OS=Oryza sativa subsp. japonica OX=39947 GN=CLPB2 PE=2 SV=1 |
| ATPA_CUSEX | ATP synthase subunit alpha, plastid OS=Cuscuta exaltata OX=476139 GN=atpA PE=3 SV=1 |
| RR19_PHYPA | 30S ribosomal protein S19, chloroplastic OS=Physcomitrium patens OX=3218 GN=rps19 PE=3 SV=1 |
| TOR1_ARATH | Microtubule-associated protein TORTIFOLIA1 OS=Arabidopsis thaliana OX=3702 GN=TOR1 PE=1 SV=2 |
| PUB26_ARATH | U-box domain-containing protein 26 OS=Arabidopsis thaliana OX=3702 GN=PUB26 PE=2 SV=1 |
| HSP7J_ARATH | Heat shock 70 kDa protein 10, mitochondrial OS=Arabidopsis thaliana OX=3702 GN=HSP70-10 PE=1 SV=1 |
| G3PA_MAIZE | Glyceraldehyde-3-phosphate dehydrogenase A, chloroplastic OS=Zea mays OX=4577 GN=GAPA PE=2 SV=1 |
| TI214_ATRBE | Protein TIC 214 OS=Atropa belladonna OX=33113 GN=TIC214 PE=3 SV=1 |
| PUM5_ARATH | Pumilio homolog 5 OS=Arabidopsis thaliana OX=3702 GN=APUM5 PE=1 SV=2 |
| RL40_BRARP | Ubiquitin-60S ribosomal protein L40 OS=Brassica rapa subsp. pekinensis OX=51351 PE=2 SV=2 |
| ZAR1_ARATH | Receptor protein kinase-like protein ZAR1 OS=Arabidopsis thaliana OX=3702 GN=ZAR1 PE=1 SV=1 |
| G3PC2_HORVU | Glyceraldehyde-3-phosphate dehydrogenase 2, cytosolic (Fragment) OS=Hordeum vulgare OX=4513 GN=GAPC PE=2 SV=1 |
| ODO2A_ARATH | Dihydrolipoyllysine-residue succinyltransferase component of 2-oxoglutarate dehydrogenase complex 1, mitochondrial OS=Arabidopsis thaliana OX=3702 GN=At5g55070 PE=1 SV=1 |
| PER49_ARATH | Peroxidase 49 OS=Arabidopsis thaliana OX=3702 GN=PER49 PE=2 SV=2 |
| ATPB_CUSPE | ATP synthase subunit beta, plastid OS=Cuscuta pentagona OX=112407 GN=atpB PE=3 SV=1 |
| RGA3_SOLBU | Putative disease resistance protein RGA3 OS=Solanum bulbocastanum OX=147425 GN=RGA3 PE=2 SV=2 |
| JAL25_ARATH | Jacalin-related lectin 25 OS=Arabidopsis thaliana OX=3702 GN=JAL25 PE=2 SV=1 |
| MAOX_POPTR | NADP-dependent malic enzyme OS=Populus trichocarpa OX=3694 PE=2 SV=3 |
| SMC22_ARATH | Structural maintenance of chromosomes protein 2-2 OS=Arabidopsis thaliana OX=3702 GN=SMC2-2 PE=2 SV=1 |
| SUC3_ARATH | Sucrose transport protein SUC3 OS=Arabidopsis thaliana OX=3702 GN=SUC3 PE=1 SV=1 |
| 14336_ARATH | 14-3-3-like protein GF14 lambda OS=Arabidopsis thaliana OX=3702 GN=GRF6 PE=1 SV=1 |
| FB250_ARATH | F-box protein At5g03100 OS=Arabidopsis thaliana OX=3702 GN=At5g03100 PE=2 SV=1 |
| MANA_CANEN | Alpha-mannosidase OS=Canavalia ensiformis OX=3823 PE=1 SV=1 |
| CB2_CHLRE | Chlorophyll a-b binding protein of LHCII type I, chloroplastic OS=Chlamydomonas reinhardtii OX=3055 GN=cabII-1 PE=3 SV=1 |
| HIPL1_ARATH | HIPL1 protein OS=Arabidopsis thaliana OX=3702 GN=HIPL1 PE=3 SV=2 |
| PER15_IPOBA | Peroxidase 15 OS=Ipomoea batatas OX=4120 GN=pod PE=1 SV=1 |
| PR39A_ARATH | Pre-mRNA-processing factor 39-1 OS=Arabidopsis thaliana OX=3702 GN=PRP39-1 PE=1 SV=1 |
| H42_WHEAT | Histone H4 variant TH091 OS=Triticum aestivum OX=4565 PE=3 SV=2 |
| ECT2_ARATH | YTH domain-containing protein ECT2 OS=Arabidopsis thaliana OX=3702 GN=ECT2 PE=1 SV=1 |
| DAPAT_ORYSJ | Probable LL-diaminopimelate aminotransferase, chloroplastic OS=Oryza sativa subsp. japonica OX=39947 GN=AGD2 PE=2 SV=1 |
| 73C12_BARVU | UDP-glycosyltransferase 73C12 OS=Barbarea vulgaris OX=50459 GN=UGT73C12 PE=1 SV=1 |
| NCPR2_ARTAN | NADPH--cytochrome P450 reductase 2 OS=Artemisia annua OX=35608 GN=CPR2 PE=3 SV=1 |
| HSP02_PSEMZ | Putative heat shock protein 2 (Fragment) OS=Pseudotsuga menziesii OX=3357 PE=1 SV=1 |
| RH27_ARATH | DEAD-box ATP-dependent RNA helicase 27 OS=Arabidopsis thaliana OX=3702 GN=RH27 PE=2 SV=2 |
| PP173_ARATH | Pentatricopeptide repeat-containing protein At2g27800, mitochondrial OS=Arabidopsis thaliana OX=3702 GN=At2g27800 PE=3 SV=2 |
| EFTM_ARATH | Elongation factor Tu, mitochondrial OS=Arabidopsis thaliana OX=3702 GN=TUFA PE=1 SV=1 |
| BIP_SPIOL | Luminal-binding protein OS=Spinacia oleracea OX=3562 GN=HSC70 PE=2 SV=1 |
| LYK4_ARATH | LysM domain receptor-like kinase 4 OS=Arabidopsis thaliana OX=3702 GN=LYK4 PE=1 SV=1 |
| AB25B_ARATH | ABC transporter B family member 25, mitochondrial OS=Arabidopsis thaliana OX=3702 GN=ABCB25 PE=1 SV=1 |
| AKT2_ORYSJ | Potassium channel AKT2 OS=Oryza sativa subsp. japonica OX=39947 GN=Os05g0428700 PE=2 SV=1 |
| RR3_NEPOL | 30S ribosomal protein S3, chloroplastic OS=Nephroselmis olivacea OX=31312 GN=rps3 PE=3 SV=1 |
| INV1_DAUCA | Beta-fructofuranosidase, insoluble isoenzyme 1 OS=Daucus carota OX=4039 GN=INV1 PE=1 SV=1 |
| TM2S_SOLLC | ToMV susceptible protein tm-2 OS=Solanum lycopersicum OX=4081 GN=tm-2 PE=1 SV=1 |
| H2AXB_ARATH | Probable histone H2AXb OS=Arabidopsis thaliana OX=3702 GN=At1g54690 PE=1 SV=1 |
| GMPP2_ORYSJ | Probable mannose-1-phosphate guanylyltransferase 2 OS=Oryza sativa subsp. japonica OX=39947 GN=Os01g0847200 PE=2 SV=1 |
| CHR4_ARATH | Protein CHROMATIN REMODELING 4 OS=Arabidopsis thaliana OX=3702 GN=CHR4 PE=2 SV=1 |
| H31_ARATH | Histone H3.1 OS=Arabidopsis thaliana OX=3702 GN=HTR2 PE=1 SV=2 |
| BGL17_ORYSJ | Putative beta-glucosidase 17 OS=Oryza sativa subsp. japonica OX=39947 GN=BGLU17 PE=5 SV=3 |
| STP6_ARATH | Sugar transport protein 6 OS=Arabidopsis thaliana OX=3702 GN=STP6 PE=1 SV=1 |
| PARP1_ORYSJ | Poly [ADP-ribose] polymerase 1 OS=Oryza sativa subsp. japonica OX=39947 GN=PARP1 PE=2 SV=1 |
| PCNA2_DAUCA | Proliferating cell nuclear antigen large form OS=Daucus carota OX=4039 PE=2 SV=1 |
| EIN2_ARATH | Ethylene-insensitive protein 2 OS=Arabidopsis thaliana OX=3702 GN=EIN2 PE=1 SV=1 |
| GPA2_PEA | Guanine nucleotide-binding protein alpha-2 subunit OS=Pisum sativum OX=3888 GN=GPA2 PE=2 SV=1 |
| H33B_LILLO | Histone H3.3b OS=Lilium longiflorum OX=4690 GN=soH3-1 PE=2 SV=3 |
| RIPLY_SILCH | Ribosome-inactivating protein lychnin OS=Silene chalcedonica OX=39855 PE=1 SV=1 |
| DEXH5_ARATH | DExH-box ATP-dependent RNA helicase DExH5, mitochondrial OS=Arabidopsis thaliana OX=3702 GN=At2g01130 PE=3 SV=1 |
| NOC3_ARATH | Nucleolar complex-associated protein 3 OS=Arabidopsis thaliana OX=3702 GN=NOC3 PE=1 SV=1 |
| PP392_ARATH | Pentatricopeptide repeat-containing protein At5g18475 OS=Arabidopsis thaliana OX=3702 GN=At5g18475 PE=2 SV=1 |
| GLYT6_ARATH | Probable glycosyltransferase At5g25310 OS=Arabidopsis thaliana OX=3702 GN=At5g25310 PE=3 SV=2 |
| DRL19_ARATH | Putative disease resistance protein At1g63350 OS=Arabidopsis thaliana OX=3702 GN=At1g63350 PE=3 SV=1 |
| TOP2_PEA | DNA topoisomerase 2 OS=Pisum sativum OX=3888 GN=TOP2 PE=2 SV=1 |
| GATC_ORYSI | Glutamyl-tRNA(Gln) amidotransferase subunit C, chloroplastic/mitochondrial OS=Oryza sativa subsp. indica OX=39946 GN=GATC PE=3 SV=1 |
| GRXS2_ORYSJ | Monothiol glutaredoxin-S2 OS=Oryza sativa subsp. japonica OX=39947 GN=GRXS2 PE=2 SV=1 |
| MAOM_AMAHP | NAD-dependent malic enzyme 65 kDa isoform, mitochondrial OS=Amaranthus hypochondriacus OX=28502 PE=1 SV=1 |
| PSB28_ARATH | Photosystem II reaction center PSB28 protein, chloroplastic OS=Arabidopsis thaliana OX=3702 GN=PSB28 PE=2 SV=1 |
| TATA_MAIZE | Sec-independent protein translocase protein TATA, chloroplastic OS=Zea mays OX=4577 GN=TATA PE=1 SV=2 |
| RK16_ADICA | 50S ribosomal protein L16, chloroplastic OS=Adiantum capillus-veneris OX=13818 GN=rpl16 PE=2 SV=1 |
| 6PGL3_ARATH | 6-phosphogluconolactonase 3, chloroplastic OS=Arabidopsis thaliana OX=3702 GN=PGL3 PE=1 SV=1 |
| ACC2_ORYSJ | Acetyl-CoA carboxylase 2 OS=Oryza sativa subsp. japonica OX=39947 GN=ACC2 PE=3 SV=2 |
| MAX2A_PETHY | F-box/LRR-repeat MAX2 homolog A OS=Petunia hybrida OX=4102 GN=MAX2A PE=1 SV=1 |
| THA8L_ARATH | Protein THYLAKOID ASSEMBLY 8-like, chloroplastic OS=Arabidopsis thaliana OX=3702 GN=THA8L PE=1 SV=1 |
| Y1150_ARATH | G-type lectin S-receptor-like serine/threonine-protein kinase At1g61500 OS=Arabidopsis thaliana OX=3702 GN=At1g61500 PE=2 SV=2 |
| CP29B_ARATH | RNA-binding protein CP29B, chloroplastic OS=Arabidopsis thaliana OX=3702 GN=CP29B PE=1 SV=1 |
| Y3649_ARATH | BTB/POZ domain-containing protein At3g26490 OS=Arabidopsis thaliana OX=3702 GN=At3g26490 PE=1 SV=1 |
| DNMT4_ARATH | DNA (cytosine-5)-methyltransferase 4 OS=Arabidopsis thaliana OX=3702 GN=MET4 PE=1 SV=1 |
| HAZ1_ORYSJ | Homeobox protein HAZ1 OS=Oryza sativa subsp. japonica OX=39947 GN=HAZ1 PE=2 SV=1 |
| PME_ACTDE | Pectinesterase OS=Actinidia deliciosa OX=3627 PE=1 SV=1 |
| SFH5_ARATH | Phosphatidylinositol/phosphatidylcholine transfer protein SFH5 OS=Arabidopsis thaliana OX=3702 GN=SFH5 PE=2 SV=1 |
| CBP22_HORVU | Serine carboxypeptidase II-2 (Fragment) OS=Hordeum vulgare OX=4513 GN=CXP;2-2 PE=1 SV=1 |
| SPZ1_ORYSJ | Serpin-Z1 OS=Oryza sativa subsp. japonica OX=39947 GN=Os01g0765400 PE=1 SV=1 |
| VP26A_ARATH | Vacuolar protein sorting-associated protein 26A OS=Arabidopsis thaliana OX=3702 GN=VPS26A PE=2 SV=1 |
| C93A3_SOYBN | Cytochrome P450 93A3 OS=Glycine max OX=3847 GN=CYP93A3 PE=2 SV=1 |
| HIP32_ARATH | Heavy metal-associated isoprenylated plant protein 32 OS=Arabidopsis thaliana OX=3702 GN=HIPP32 PE=2 SV=1 |
| FB14_ARATH | Putative F-box protein At1g20800 OS=Arabidopsis thaliana OX=3702 GN=At1g20800 PE=4 SV=1 |
| RUBB_BRANA | RuBisCO large subunit-binding protein subunit beta, chloroplastic OS=Brassica napus OX=3708 PE=2 SV=1 |
| SMC3_ARATH | Structural maintenance of chromosomes protein 3 OS=Arabidopsis thaliana OX=3702 GN=SMC3 PE=2 SV=1 |
| VP201_ARATH | Vacuolar protein sorting-associated protein 20 homolog 1 OS=Arabidopsis thaliana OX=3702 GN=VPS20.1 PE=1 SV=1 |
| RR4_CHAGL | 30S ribosomal protein S4, chloroplastic OS=Chaetosphaeridium globosum OX=96477 GN=rps4 PE=3 SV=1 |
| CFA43_CHLRE | Cilia- and flagella-associated protein 43 OS=Chlamydomonas reinhardtii OX=3055 GN=CFAP43 PE=1 SV=1 |
| CCC11_ORYSJ | Cyclin-C1-1 OS=Oryza sativa subsp. japonica OX=39947 GN=Os09g0504400 PE=2 SV=1 |
| GSTF8_ARATH | Glutathione S-transferase F8, chloroplastic OS=Arabidopsis thaliana OX=3702 GN=GSTF8 PE=1 SV=3 |
| ERA_ARATH | GTPase ERA-like, chloroplastic OS=Arabidopsis thaliana OX=3702 GN=At5g66470 PE=2 SV=1 |
| PER50_ARATH | Peroxidase 50 OS=Arabidopsis thaliana OX=3702 GN=PER50 PE=1 SV=1 |
| CID5_ARATH | Polyadenylate-binding protein-interacting protein 5 OS=Arabidopsis thaliana OX=3702 GN=CID5 PE=2 SV=1 |
| PNP2_ORYSJ | Polyribonucleotide nucleotidyltransferase 2, mitochondrial OS=Oryza sativa subsp. japonica OX=39947 GN=PNP2 PE=2 SV=1 |
| DRP3B_ARATH | Dynamin-related protein 3B OS=Arabidopsis thaliana OX=3702 GN=DRP3B PE=1 SV=2 |
| ETO1_ARATH | Ethylene-overproduction protein 1 OS=Arabidopsis thaliana OX=3702 GN=ETO1 PE=1 SV=2 |
| HDT1_MAIZE | Histone deacetylase HDT1 OS=Zea mays OX=4577 GN=HDT1 PE=1 SV=1 |
| PPR9_ARATH | Pentatricopeptide repeat-containing protein At1g03560, mitochondrial OS=Arabidopsis thaliana OX=3702 GN=At1g03560 PE=2 SV=1 |
| PHOT_CHLRE | Phototropin OS=Chlamydomonas reinhardtii OX=3055 GN=PHOT PE=1 SV=1 |
| P2C74_ARATH | Probable protein phosphatase 2C 74 OS=Arabidopsis thaliana OX=3702 GN=At5g36250 PE=1 SV=1 |
| C3H65_ORYSJ | Zinc finger CCCH domain-containing protein 65 OS=Oryza sativa subsp. japonica OX=39947 GN=Os12g0278800 PE=2 SV=1 |
| HXK8_ORYSJ | Hexokinase-8 OS=Oryza sativa subsp. japonica OX=39947 GN=HXK8 PE=2 SV=2 |
| MATK_IRISA | Maturase K OS=Iris sanguinea OX=198824 GN=matK PE=3 SV=1 |
| DRM1L_ARATH | DNA (cytosine-5)-methyltransferase DRM1 OS=Arabidopsis thaliana OX=3702 GN=DRM1 PE=3 SV=2 |
| PRP16_ARATH | Pre-mRNA-splicing factor ATP-dependent RNA helicase DEAH7 OS=Arabidopsis thaliana OX=3702 GN=CUV PE=1 SV=1 |
| TSL_ARATH | Serine/threonine-protein kinase TOUSLED OS=Arabidopsis thaliana OX=3702 GN=TOUSLED PE=1 SV=1 |
| TLP1_ORYSJ | Tubby-like F-box protein 1 OS=Oryza sativa subsp. japonica OX=39947 GN=TULP1 PE=2 SV=1 |
| CDPKK_ORYSJ | Calcium-dependent protein kinase 20 OS=Oryza sativa subsp. japonica OX=39947 GN=CPK20 PE=2 SV=2 |
| CIPK6_ARATH | CBL-interacting serine/threonine-protein kinase 6 OS=Arabidopsis thaliana OX=3702 GN=CIPK6 PE=1 SV=1 |
| CDKE1_ARATH | Cyclin-dependent kinase E-1 OS=Arabidopsis thaliana OX=3702 GN=CDKE-1 PE=1 SV=2 |
| RH57_ARATH | DEAD-box ATP-dependent RNA helicase 57 OS=Arabidopsis thaliana OX=3702 GN=RH57 PE=2 SV=1 |
| ILV5_PEA | Ketol-acid reductoisomerase, chloroplastic OS=Pisum sativum OX=3888 GN=PGAAIR PE=2 SV=1 |
| PP141_ARATH | Pentatricopeptide repeat-containing protein At2g01740 OS=Arabidopsis thaliana OX=3702 GN=At2g01740 PE=3 SV=1 |
| PAS1_ARATH | Peptidyl-prolyl cis-trans isomerase PASTICCINO1 OS=Arabidopsis thaliana OX=3702 GN=PAS1 PE=1 SV=2 |
| PLA14_ARATH | Phospholipase A1-Ibeta2, chloroplastic OS=Arabidopsis thaliana OX=3702 GN=At4g16820 PE=1 SV=2 |
| TPS17_SOLHA | Terpene synthase 17 OS=Solanum habrochaites OX=62890 GN=TPS17 PE=1 SV=1 |
| ACCH3_ARATH | 1-aminocyclopropane-1-carboxylate oxidase homolog 3 OS=Arabidopsis thaliana OX=3702 GN=At1g06650 PE=2 SV=1 |
| BGL28_ARATH | Beta-glucosidase 28 OS=Arabidopsis thaliana OX=3702 GN=BGLU28 PE=2 SV=1 |
| MAD58_ORYSJ | MADS-box transcription factor 58 OS=Oryza sativa subsp. japonica OX=39947 GN=MADS58 PE=2 SV=1 |
| NDHH_ANTAG | NAD(P)H-quinone oxidoreductase subunit H, chloroplastic OS=Anthoceros angustus OX=48387 GN=ndhH PE=2 SV=1 |
| P2C25_ORYSJ | Probable protein phosphatase 2C 25 OS=Oryza sativa subsp. japonica OX=39947 GN=Os02g0685600 PE=2 SV=1 |
| RVE7_ARATH | Protein REVEILLE 7 OS=Arabidopsis thaliana OX=3702 GN=RVE7 PE=2 SV=1 |
| PP1_PHAVU | Serine/threonine-protein phosphatase PP1 OS=Phaseolus vulgaris OX=3885 PE=2 SV=1 |
| TRXH_POPJC | Thioredoxin H-type OS=Populus jackii OX=640484 PE=1 SV=1 |
| TGAL6_ORYSJ | Transcription factor TGAL6 OS=Oryza sativa subsp. japonica OX=39947 GN=TGAL6 PE=2 SV=1 |
| AB1A_ARATH | ABC transporter A family member 1 OS=Arabidopsis thaliana OX=3702 GN=ABCA1 PE=2 SV=2 |
| IF4A3_ARATH | Eukaryotic initiation factor 4A-3 OS=Arabidopsis thaliana OX=3702 GN=TIF4A-3 PE=1 SV=1 |
| PLDZ2_ARATH | Phospholipase D zeta 2 OS=Arabidopsis thaliana OX=3702 GN=PLPZETA2 PE=1 SV=2 |
| RR15_ZYGCR | 30S ribosomal protein S15, chloroplastic OS=Zygnema circumcarinatum OX=35869 GN=rps15 PE=3 SV=1 |
| SYD_ARATH | Chromatin structure-remodeling complex protein SYD OS=Arabidopsis thaliana OX=3702 GN=SYD PE=1 SV=1 |
| C71AM_ARATH | Cytochrome P450 71A22 OS=Arabidopsis thaliana OX=3702 GN=CYP71A22 PE=2 SV=1 |
| RH35B_ORYSJ | DEAD-box ATP-dependent RNA helicase 35B OS=Oryza sativa subsp. japonica OX=39947 GN=Os06g0697200 PE=3 SV=1 |
| FH12_ORYSJ | Formin-like protein 12 OS=Oryza sativa subsp. japonica OX=39947 GN=FH12 PE=3 SV=3 |
| PABP8_ARATH | Polyadenylate-binding protein 8 OS=Arabidopsis thaliana OX=3702 GN=PAB8 PE=1 SV=1 |
| BXL6_ARATH | Probable beta-D-xylosidase 6 OS=Arabidopsis thaliana OX=3702 GN=BXL6 PE=2 SV=1 |
| AGO1A_ORYSJ | Protein argonaute 1A OS=Oryza sativa subsp. japonica OX=39947 GN=AGO1A PE=2 SV=1 |
| SKP20_ORYSJ | SKP1-like protein 20 OS=Oryza sativa subsp. japonica OX=39947 GN=SKP20 PE=1 SV=1 |
| VQ19_ARATH | VQ motif-containing protein 19 OS=Arabidopsis thaliana OX=3702 GN=VQ19 PE=1 SV=1 |
| PIK6_ORYSJ | Disease resistance protein PIK6-NP OS=Oryza sativa subsp. japonica OX=39947 GN=PIK6-NP PE=2 SV=1 |
| IF4G2_ORYSJ | Eukaryotic translation initiation factor isoform 4G-2 OS=Oryza sativa subsp. japonica OX=39947 GN=Os02g0611500 PE=2 SV=1 |
| LCAT4_ARATH | Lecithin-cholesterol acyltransferase-like 4 OS=Arabidopsis thaliana OX=3702 GN=LCAT4 PE=1 SV=1 |
| NCPR1_ARTAN | NADPH--cytochrome P450 reductase 1 OS=Artemisia annua OX=35608 GN=CPR1 PE=1 SV=2 |
| PSBS_SOLSG | Photosystem II 22 kDa protein, chloroplastic OS=Solanum sogarandinum OX=52705 GN=PSBS PE=2 SV=1 |
| TI10A_ARATH | Protein TIFY 10A OS=Arabidopsis thaliana OX=3702 GN=TIFY10A PE=1 SV=1 |
| AB33G_ARATH | ABC transporter G family member 33 OS=Arabidopsis thaliana OX=3702 GN=ABCG33 PE=2 SV=1 |
| RCA_CHLRE | Ribulose bisphosphate carboxylase/oxygenase activase, chloroplastic OS=Chlamydomonas reinhardtii OX=3055 PE=2 SV=1 |
| BBE17_ARATH | Berberine bridge enzyme-like 17 OS=Arabidopsis thaliana OX=3702 GN=At4g20800 PE=2 SV=1 |
| KN7O_ARATH | Kinesin-like protein KIN-7O OS=Arabidopsis thaliana OX=3702 GN=KIN7O PE=3 SV=1 |
| CHR12_ARATH | Probable ATP-dependent DNA helicase CHR12 OS=Arabidopsis thaliana OX=3702 GN=CHR12 PE=2 SV=1 |
| ISW2_ORYSJ | Probable chromatin-remodeling complex ATPase chain OS=Oryza sativa subsp. japonica OX=39947 GN=Os01g0367900 PE=2 SV=2 |
| GUF1_SORBI | Translation factor GUF1 homolog, mitochondrial OS=Sorghum bicolor OX=4558 GN=Sb10g003070 PE=3 SV=1 |
| NAC6_SOYBN | NAC domain-containing protein 6 OS=Glycine max OX=3847 GN=NAC6 PE=2 SV=1 |
| QWRF2_ARATH | QWRF motif-containing protein 2 OS=Arabidopsis thaliana OX=3702 GN=QWRF2 PE=2 SV=1 |
| C3H14_ORYSJ | Zinc finger CCCH domain-containing protein 14 OS=Oryza sativa subsp. japonica OX=39947 GN=Os02g0194200 PE=2 SV=1 |
| CSLD5_ARATH | Cellulose synthase-like protein D5 OS=Arabidopsis thaliana OX=3702 GN=CSLD5 PE=2 SV=1 |
| HOS1_ARATH | E3 ubiquitin-protein ligase HOS1 OS=Arabidopsis thaliana OX=3702 GN=HOS1 PE=1 SV=1 |
| GP210_ARATH | Nuclear pore complex protein GP210 OS=Arabidopsis thaliana OX=3702 GN=GB210 PE=1 SV=1 |
| RK23_ACOCL | 50S ribosomal protein L23, chloroplastic OS=Acorus calamus OX=4465 GN=rpl23-A PE=3 SV=1 |
| GATB2_MICPC | Glutamyl-tRNA(Gln) amidotransferase subunit B-2, chloroplastic/mitochondrial OS=Micromonas pusilla (strain CCMP1545) OX=564608 GN=GATB-2 PE=3 SV=1 |

**Table S3**. Proteins identified by proteomic analysis of *S. sclarea* HRs.

| **Accession** | **Description** |
| --- | --- |
| G3P_ATRNU | Glyceraldehyde-3-phosphate dehydrogenase OS=Atriplex nummularia OX=3553 PE=2 SV=1 |
| METE_PLESU | 5-methyltetrahydropteroyltriglutamate--homocysteine methyltransferase OS=Plectranthus scutellarioides OX=4142 GN=MET PE=1 SV=2 |
| VATA_DAUCA | V-type proton ATPase catalytic subunit A OS=Daucus carota OX=4039 PE=2 SV=1 |
| BIP4_TOBAC | Luminal-binding protein 4 OS=Nicotiana tabacum OX=4097 GN=BIP4 PE=2 SV=1 |
| ENO_ALNGL | Enolase OS=Alnus glutinosa OX=3517 GN=PGH1 PE=2 SV=1 |
| HSP80_SOLLC | Heat shock cognate protein 80 OS=Solanum lycopersicum OX=4081 GN=HSC80 PE=2 SV=1 |
| BIP1_ARATH | Heat shock 70 kDa protein BIP1 OS=Arabidopsis thaliana OX=3702 GN=BIP1 PE=1 SV=1 |
| HSP70_MAIZE | Heat shock 70 kDa protein OS=Zea mays OX=4577 GN=HSP70 PE=3 SV=2 |
| CH60A_ARATH | Chaperonin CPN60, mitochondrial OS=Arabidopsis thaliana OX=3702 GN=CPN60 PE=1 SV=2 |
| VATB1_HORVU | V-type proton ATPase subunit B 1 OS=Hordeum vulgare OX=4513 PE=2 SV=1 |
| RUB1_BRANA | RuBisCO large subunit-binding protein subunit alpha, chloroplastic (Fragment) OS=Brassica napus OX=3708 PE=2 SV=2 |
| HS901_ARATH | Heat shock protein 90-1 OS=Arabidopsis thaliana OX=3702 GN=HSP90-1 PE=1 SV=3 |
| HS902_ARATH | Heat shock protein 90-2 OS=Arabidopsis thaliana OX=3702 GN=HSP90-2 PE=1 SV=1 |
| HS904_ARATH | Heat shock protein 90-4 OS=Arabidopsis thaliana OX=3702 GN=HSP90-4 PE=1 SV=1 |
| SAHH_MESCR | Adenosylhomocysteinase OS=Mesembryanthemum crystallinum OX=3544 GN=SAHH PE=2 SV=1 |
| CPNB2_ARATH | Chaperonin 60 subunit beta 2, chloroplastic OS=Arabidopsis thaliana OX=3702 GN=CPN60B2 PE=1 SV=1 |
| HSP83_IPONI | Heat shock protein 83 OS=Ipomoea nil OX=35883 GN=HSP83A PE=2 SV=1 |
| RUBB_PEA | RuBisCO large subunit-binding protein subunit beta, chloroplastic OS=Pisum sativum OX=3888 PE=1 SV=2 |
| CPNB3_ARATH | Chaperonin 60 subunit beta 3, chloroplastic OS=Arabidopsis thaliana OX=3702 GN=CPN60B3 PE=1 SV=1 |
| 14335_SOLTU | 14-3-3-like protein 16R OS=Solanum tuberosum OX=4113 PE=2 SV=1 |
| TKTC_SPIOL | Transketolase, chloroplastic OS=Spinacia oleracea OX=3562 PE=1 SV=1 |
| CH60B_ARATH | Chaperonin CPN60-like 1, mitochondrial OS=Arabidopsis thaliana OX=3702 GN=At2g33210 PE=1 SV=1 |
| MDHC_MESCR | Malate dehydrogenase, cytoplasmic OS=Mesembryanthemum crystallinum OX=3544 GN=MDH PE=2 SV=1 |
| IDHP_MEDSA | Isocitrate dehydrogenase [NADP], chloroplastic (Fragment) OS=Medicago sativa OX=3879 PE=2 SV=1 |
| PGMC_POPTN | Phosphoglucomutase, cytoplasmic OS=Populus tremula OX=113636 GN=PGM1 PE=2 SV=1 |
| 14332_SOLLC | 14-3-3 protein 2 OS=Solanum lycopersicum OX=4081 GN=TFT2 PE=3 SV=2 |
| IDHC_SOYBN | Isocitrate dehydrogenase [NADP] OS=Glycine max OX=3847 GN=IDH1 PE=1 SV=2 |
| 1433C_TOBAC | 14-3-3-like protein C OS=Nicotiana tabacum OX=4097 PE=1 SV=1 |
| PER1_ZINVI | Basic peroxidase OS=Zinnia violacea OX=34245 GN=POD1 PE=1 SV=1 |
| ILV5_PEA | Ketol-acid reductoisomerase, chloroplastic OS=Pisum sativum OX=3888 GN=PGAAIR PE=2 SV=1 |
| ICDHC_ARATH | Cytosolic isocitrate dehydrogenase [NADP] OS=Arabidopsis thaliana OX=3702 GN=CICDH PE=1 SV=1 |
| RUBA_PEA | RuBisCO large subunit-binding protein subunit alpha, chloroplastic OS=Pisum sativum OX=3888 PE=1 SV=2 |
| PGKH_TOBAC | Phosphoglycerate kinase, chloroplastic OS=Nicotiana tabacum OX=4097 PE=2 SV=1 |
| MDHM1_ARATH | Malate dehydrogenase 1, mitochondrial OS=Arabidopsis thaliana OX=3702 GN=At1g53240 PE=1 SV=1 |
| GLTB_SPIOL | Ferredoxin-dependent glutamate synthase, chloroplastic OS=Spinacia oleracea OX=3562 GN=FdGOGAT PE=1 SV=4 |
| RGP3_ORYSJ | UDP-arabinopyranose mutase 3 OS=Oryza sativa subsp. japonica OX=39947 GN=UAM3 PE=1 SV=1 |
| ACOHC_ORYSJ | Putative aconitate hydratase, cytoplasmic OS=Oryza sativa subsp. japonica OX=39947 GN=Os08g0191100 PE=3 SV=1 |
| ACO3M_ARATH | Aconitate hydratase 3, mitochondrial OS=Arabidopsis thaliana OX=3702 GN=ACO3 PE=1 SV=2 |
| MDARS_CUCSA | Monodehydroascorbate reductase, seedling isozyme OS=Cucumis sativus OX=3659 PE=2 SV=1 |
| LEGRE_VIGUN | Leghemoglobin reductase OS=Vigna unguiculata OX=3917 GN=FLBR PE=1 SV=1 |
| 14339_SOLLC | 14-3-3 protein 9 OS=Solanum lycopersicum OX=4081 GN=TFT9 PE=2 SV=2 |
| DLDH_PEA | Dihydrolipoyl dehydrogenase, mitochondrial OS=Pisum sativum OX=3888 GN=LPD PE=1 SV=2 |
| ENO1_ARATH | Enolase 1, chloroplastic OS=Arabidopsis thaliana OX=3702 GN=ENO1 PE=1 SV=1 |
| EF2_ARATH | Elongation factor 2 OS=Arabidopsis thaliana OX=3702 GN=LOS1 PE=1 SV=1 |
| DLDH1_ARATH | Dihydrolipoyl dehydrogenase 1, mitochondrial OS=Arabidopsis thaliana OX=3702 GN=LPD1 PE=1 SV=2 |
| PGKY_TOBAC | Phosphoglycerate kinase, cytosolic OS=Nicotiana tabacum OX=4097 PE=2 SV=1 |
| CH61_MAIZE | Chaperonin CPN60-1, mitochondrial OS=Zea mays OX=4577 GN=CPN60I PE=1 SV=2 |
| ACOHC_SOLTU | Aconitate hydratase, cytoplasmic (Fragment) OS=Solanum tuberosum OX=4113 PE=2 SV=1 |
| ACO1_ARATH | Aconitate hydratase 1 OS=Arabidopsis thaliana OX=3702 GN=ACO1 PE=1 SV=2 |
| H43_MAIZE | Histone H4.3 OS=Zea mays OX=4577 GN=H4 PE=1 SV=3 |
| VATB2_GOSHI | V-type proton ATPase subunit B 2 (Fragment) OS=Gossypium hirsutum OX=3635 PE=2 SV=1 |
| PGMC1_MAIZE | Phosphoglucomutase, cytoplasmic 1 OS=Zea mays OX=4577 PE=1 SV=2 |
| AATC_DAUCA | Aspartate aminotransferase, cytoplasmic OS=Daucus carota OX=4039 PE=2 SV=1 |
| DHEB_NICPL | Glutamate dehydrogenase B OS=Nicotiana plumbaginifolia OX=4092 GN=GDHB PE=2 SV=1 |
| ALFC4_ARATH | Fructose-bisphosphate aldolase 4, cytosolic OS=Arabidopsis thaliana OX=3702 GN=FBA4 PE=1 SV=1 |
| 6PGD2_SPIOL | 6-phosphogluconate dehydrogenase, decarboxylating 2, chloroplastic OS=Spinacia oleracea OX=3562 GN=pgdP PE=1 SV=1 |
| MDHM_IMPCY | Malate dehydrogenase, mitochondrial (Fragments) OS=Imperata cylindrica OX=80369 PE=1 SV=1 |
| RGP1_PEA | Probable UDP-arabinopyranose mutase 1 OS=Pisum sativum OX=3888 GN=UPTG PE=1 SV=1 |
| ALFC5_ARATH | Fructose-bisphosphate aldolase 5, cytosolic OS=Arabidopsis thaliana OX=3702 GN=FBA5 PE=1 SV=1 |
| HSP82_MAIZE | Heat shock protein 82 OS=Zea mays OX=4577 GN=HSP82 PE=3 SV=1 |
| PAT_PETHY | Bifunctional aspartate aminotransferase and glutamate/aspartate-prephenate aminotransferase OS=Petunia hybrida OX=4102 GN=PPA-AT PE=1 SV=1 |
| KPYC2_ORYSI | Pyruvate kinase 2, cytosolic OS=Oryza sativa subsp. indica OX=39946 GN=OsI_37456 PE=3 SV=1 |
| PAT_PINPS | Aspartate aminotransferase OS=Pinus pinaster OX=71647 GN=AAT PE=1 SV=1 |
| PSA5_ORYSJ | Proteasome subunit alpha type-5 OS=Oryza sativa subsp. japonica OX=39947 GN=PAE1 PE=2 SV=1 |
| ALAT2_ARATH | Alanine aminotransferase 2, mitochondrial OS=Arabidopsis thaliana OX=3702 GN=ALAAT2 PE=1 SV=1 |
| PSA5A_ARATH | Proteasome subunit alpha type-5-A OS=Arabidopsis thaliana OX=3702 GN=PAE1 PE=1 SV=1 |
| ASO_CATRO | O-acetylstemmadenine oxidase OS=Catharanthus roseus OX=4058 GN=ASO PE=1 SV=1 |
| ATPBM_HEVBR | ATP synthase subunit beta, mitochondrial OS=Hevea brasiliensis OX=3981 GN=ATPB PE=2 SV=1 |
| GLTB1_ARATH | Ferredoxin-dependent glutamate synthase 1, chloroplastic/mitochondrial OS=Arabidopsis thaliana OX=3702 GN=GLU1 PE=1 SV=3 |
| SCRK_SOLTU | Fructokinase OS=Solanum tuberosum OX=4113 PE=2 SV=1 |
| MDAR_SOLLC | Monodehydroascorbate reductase OS=Solanum lycopersicum OX=4081 GN=AFRR PE=1 SV=1 |
| RUB1_ARATH | Ubiquitin-NEDD8-like protein RUB1 OS=Arabidopsis thaliana OX=3702 GN=RUB1 PE=1 SV=3 |
| METK3_CATRO | S-adenosylmethionine synthase 3 OS=Catharanthus roseus OX=4058 GN=SAMS3 PE=1 SV=1 |
| MDAR5_ORYSJ | Monodehydroascorbate reductase 5, chlorplastic OS=Oryza sativa subsp. japonica OX=39947 GN=MDAR5 PE=2 SV=2 |
| 6PGD1_SPIOL | 6-phosphogluconate dehydrogenase, decarboxylating 1 OS=Spinacia oleracea OX=3562 GN=pgdC PE=1 SV=1 |
| HEM6_SOYBN | Oxygen-dependent coproporphyrinogen-III oxidase, chloroplastic OS=Glycine max OX=3847 GN=CPX PE=2 SV=1 |
| SYPC_ARATH | Proline--tRNA ligase, cytoplasmic OS=Arabidopsis thaliana OX=3702 GN=At3g62120 PE=1 SV=1 |
| PMG1_ARATH | 2,3-bisphosphoglycerate-independent phosphoglycerate mutase 1 OS=Arabidopsis thaliana OX=3702 GN=PGM1 PE=1 SV=3 |
| AMPL2_ORYSJ | Leucine aminopeptidase 2, chloroplastic OS=Oryza sativa subsp. japonica OX=39947 GN=Os02g0794700 PE=2 SV=1 |
| GSHRP_SPIOL | Glutathione reductase, chloroplastic (Fragment) OS=Spinacia oleracea OX=3562 PE=2 SV=1 |
| LGUC_ARATH | Probable lactoylglutathione lyase, chloroplastic OS=Arabidopsis thaliana OX=3702 GN=At1g67280 PE=1 SV=1 |
| PLDA2_ARATH | Phospholipase D alpha 2 OS=Arabidopsis thaliana OX=3702 GN=PLDALPHA2 PE=2 SV=1 |
| 6PGD3_ARATH | 6-phosphogluconate dehydrogenase, decarboxylating 3, chloroplastic OS=Arabidopsis thaliana OX=3702 GN=PGD3 PE=1 SV=1 |
| EF1A_WHEAT | Elongation factor 1-alpha OS=Triticum aestivum OX=4565 GN=TEF1 PE=2 SV=1 |
| PER1_ARAHY | Cationic peroxidase 1 OS=Arachis hypogaea OX=3818 GN=PNC1 PE=1 SV=2 |
| NIR_BETPN | Ferredoxin--nitrite reductase, chloroplastic OS=Betula pendula OX=3505 GN=NIR1 PE=2 SV=1 |
| PSA7B_ARATH | Proteasome subunit alpha type-7-B OS=Arabidopsis thaliana OX=3702 GN=PAD2 PE=1 SV=2 |
| BAS1_ORYSJ | 2-Cys peroxiredoxin BAS1, chloroplastic OS=Oryza sativa subsp. japonica OX=39947 GN=BAS1 PE=1 SV=1 |
| EF1A1_ARATH | Elongation factor 1-alpha 1 OS=Arabidopsis thaliana OX=3702 GN=A1 PE=1 SV=1 |
| OLPA_HEVBR | Osmotin-like protein (Fragments) OS=Hevea brasiliensis OX=3981 PE=1 SV=1 |
| CYSK_SOLTU | Cysteine synthase OS=Solanum tuberosum OX=4113 PE=2 SV=1 |
| ACOX1_ARATH | Peroxisomal acyl-coenzyme A oxidase 1 OS=Arabidopsis thaliana OX=3702 GN=ACX1 PE=1 SV=1 |
| RGP1_ARATH | UDP-arabinopyranose mutase 1 OS=Arabidopsis thaliana OX=3702 GN=RGP1 PE=1 SV=1 |
| MAOX_VITVI | NADP-dependent malic enzyme OS=Vitis vinifera OX=29760 PE=2 SV=1 |
| NDKB_FLABI | Nucleoside diphosphate kinase B OS=Flaveria bidentis OX=4224 PE=2 SV=1 |
| PLDA1_TOBAC | Phospholipase D alpha 1 OS=Nicotiana tabacum OX=4097 GN=PLD1 PE=2 SV=2 |
| PSA7_CICAR | Proteasome subunit alpha type-7 OS=Cicer arietinum OX=3827 GN=PAD1 PE=2 SV=1 |
| AL7A1_BRANA | Aldehyde dehydrogenase family 7 member A1 OS=Brassica napus OX=3708 GN=BTG-26 PE=1 SV=3 |
| CALR_BETVU | Calreticulin OS=Beta vulgaris OX=161934 PE=2 SV=1 |
| SUS2_SOLTU | Sucrose synthase OS=Solanum tuberosum OX=4113 PE=3 SV=1 |
| DCE_PETHY | Glutamate decarboxylase OS=Petunia hybrida OX=4102 GN=GAD PE=1 SV=1 |
| METK4_VITVI | S-adenosylmethionine synthase 4 OS=Vitis vinifera OX=29760 GN=METK4 PE=3 SV=1 |
| LGUL_ORYSJ | Lactoylglutathione lyase OS=Oryza sativa subsp. japonica OX=39947 GN=GLYI-11 PE=1 SV=2 |
| METK_DENCR | S-adenosylmethionine synthase OS=Dendrobium crumenatum OX=51096 GN=SAMS PE=2 SV=1 |
| SUS1_DAUCA | Sucrose synthase isoform 1 OS=Daucus carota OX=4039 PE=2 SV=1 |
| CALR1_ARATH | Calreticulin-1 OS=Arabidopsis thaliana OX=3702 GN=CRT1 PE=1 SV=1 |
| CYSKM_ARATH | Cysteine synthase, mitochondrial OS=Arabidopsis thaliana OX=3702 GN=OASC PE=1 SV=3 |
| DCE4_ARATH | Glutamate decarboxylase 4 OS=Arabidopsis thaliana OX=3702 GN=GAD4 PE=1 SV=1 |
| GLNA3_MAIZE | Glutamine synthetase root isozyme 3 OS=Zea mays OX=4577 GN=GLN4 PE=1 SV=1 |
| DHE3_VITVI | Glutamate dehydrogenase OS=Vitis vinifera OX=29760 GN=GDH PE=2 SV=1 |
| MAOC_SOLLC | NADP-dependent malic enzyme, chloroplastic (Fragment) OS=Solanum lycopersicum OX=4081 PE=2 SV=1 |
| GSA_SOYBN | Glutamate-1-semialdehyde 2,1-aminomutase, chloroplastic OS=Glycine max OX=3847 GN=GSA1 PE=2 SV=1 |
| CYSK_MAIZE | Cysteine synthase OS=Zea mays OX=4577 PE=1 SV=2 |
| GSTXA_TOBAC | Probable glutathione S-transferase parA OS=Nicotiana tabacum OX=4097 GN=PARA PE=2 SV=1 |
| EF1G_PRUAV | Elongation factor 1-gamma OS=Prunus avium OX=42229 PE=2 SV=1 |
| PSA6_TOBAC | Proteasome subunit alpha type-6 OS=Nicotiana tabacum OX=4097 GN=PAA1 PE=2 SV=1 |
| AAT3_ARATH | Aspartate aminotransferase 3, chloroplastic OS=Arabidopsis thaliana OX=3702 GN=ASP3 PE=1 SV=1 |
| IDI1_CAMAC | Isopentenyl-diphosphate Delta-isomerase I OS=Camptotheca acuminata OX=16922 GN=IPI1 PE=2 SV=1 |
| G6PIP_ARATH | Glucose-6-phosphate isomerase 1, chloroplastic OS=Arabidopsis thaliana OX=3702 GN=PGI1 PE=1 SV=1 |
| PGKY3_ARATH | Phosphoglycerate kinase 3, cytosolic OS=Arabidopsis thaliana OX=3702 GN=PGK3 PE=1 SV=1 |
| PSA4_PETHY | Proteasome subunit alpha type-4 OS=Petunia hybrida OX=4102 GN=PAC1 PE=2 SV=1 |
| METK2_BRAJU | S-adenosylmethionine synthase 2 OS=Brassica juncea OX=3707 GN=MSAMS2 PE=2 SV=1 |
| DHE2_ARATH | Glutamate dehydrogenase 2 OS=Arabidopsis thaliana OX=3702 GN=GDH2 PE=1 SV=1 |
| TBB6_ORYSJ | Tubulin beta-6 chain OS=Oryza sativa subsp. japonica OX=39947 GN=TUBB6 PE=2 SV=1 |
| FNRR2_ARATH | Ferredoxin--NADP reductase, root isozyme 2, chloroplastic OS=Arabidopsis thaliana OX=3702 GN=RFNR2 PE=1 SV=1 |
| MANA1_ARATH | Alpha-mannosidase At3g26720 OS=Arabidopsis thaliana OX=3702 GN=At3g26720 PE=1 SV=1 |
| PSA1_ORYSJ | Proteasome subunit alpha type-1 OS=Oryza sativa subsp. japonica OX=39947 GN=PAF1 PE=2 SV=1 |
| ACLB2_ARATH | ATP-citrate synthase beta chain protein 2 OS=Arabidopsis thaliana OX=3702 GN=ACLB-2 PE=1 SV=1 |
| RRAA1_ARATH | Putative 4-hydroxy-4-methyl-2-oxoglutarate aldolase 1 OS=Arabidopsis thaliana OX=3702 GN=At3g02770 PE=2 SV=1 |
| DHEA_NICPL | Glutamate dehydrogenase A OS=Nicotiana plumbaginifolia OX=4092 GN=GDHA PE=2 SV=1 |
| LDHA_HORVU | L-lactate dehydrogenase A OS=Hordeum vulgare OX=4513 PE=1 SV=1 |
| ILVD_ARATH | Dihydroxy-acid dehydratase, chloroplastic OS=Arabidopsis thaliana OX=3702 GN=DHAD PE=1 SV=1 |
| PSA3_ARATH | Proteasome subunit alpha type-3 OS=Arabidopsis thaliana OX=3702 GN=PAG1 PE=1 SV=2 |
| GATP1_SOLLC | Gamma aminobutyrate transaminase 1, mitochondrial OS=Solanum lycopersicum OX=4081 GN=GABA-TP1 PE=1 SV=1 |
| SYA_ARATH | Alanine--tRNA ligase OS=Arabidopsis thaliana OX=3702 GN=ALATS PE=1 SV=3 |
| MDAR1_ARATH | Monodehydroascorbate reductase 1, peroxisomal OS=Arabidopsis thaliana OX=3702 GN=MDAR1 PE=1 SV=1 |
| FENR2_PEA | Ferredoxin--NADP reductase, root isozyme, chloroplastic OS=Pisum sativum OX=3888 PE=2 SV=2 |
| GLYC4_ARATH | Serine hydroxymethyltransferase 4 OS=Arabidopsis thaliana OX=3702 GN=SHM4 PE=1 SV=1 |
| TBA_WHEAT | Tubulin alpha chain OS=Triticum aestivum OX=4565 GN=TUBA PE=2 SV=1 |
| PSA_ARATH | Puromycin-sensitive aminopeptidase OS=Arabidopsis thaliana OX=3702 GN=MPA1 PE=2 SV=1 |
| TBB8_ORYSJ | Tubulin beta-8 chain OS=Oryza sativa subsp. japonica OX=39947 GN=TUBB8 PE=2 SV=1 |
| ALFP3_ARATH | Fructose-bisphosphate aldolase 3, chloroplastic OS=Arabidopsis thaliana OX=3702 GN=FBA3 PE=1 SV=1 |
| MANA2_ARATH | Probable alpha-mannosidase At5g13980 OS=Arabidopsis thaliana OX=3702 GN=At5g13980 PE=2 SV=1 |
| AATM_LUPAN | Aspartate aminotransferase P2, mitochondrial (Fragment) OS=Lupinus angustifolius OX=3871 PE=2 SV=1 |
| ARGI1_ORYSJ | Arginase 1, mitochondrial OS=Oryza sativa subsp. japonica OX=39947 GN=ARG1 PE=2 SV=1 |
| 14337_SOLLC | 14-3-3 protein 7 OS=Solanum lycopersicum OX=4081 GN=TFT7 PE=2 SV=2 |
| CBCAS_CANSA | Cannabichromenic acid synthase OS=Cannabis sativa OX=3483 GN=CBCAS PE=1 SV=1 |
| KIRO_ACTDE | Kirola OS=Actinidia deliciosa OX=3627 PE=1 SV=1 |
| METK1_SOLTU | S-adenosylmethionine synthase 1 OS=Solanum tuberosum OX=4113 GN=METK1 PE=2 SV=1 |
| UP07_DAUCA | Unknown protein 7 (Fragment) OS=Daucus carota OX=4039 PE=1 SV=1 |
| CALR2_ARATH | Calreticulin-2 OS=Arabidopsis thaliana OX=3702 GN=CRT2 PE=1 SV=3 |
| PER52_ARATH | Peroxidase 52 OS=Arabidopsis thaliana OX=3702 GN=PER52 PE=2 SV=1 |
| EBM_LILLO | Mannosylglycoprotein endo-beta-mannosidase OS=Lilium longiflorum OX=4690 GN=EBM PE=1 SV=4 |
| UGPA_ASTPN | UTP--glucose-1-phosphate uridylyltransferase OS=Astragalus penduliflorus OX=158323 GN=UGP PE=2 SV=1 |
| NOMT3_NARAP | Norbelladine 4'-O-methyltransferase 3 OS=Narcissus aff. pseudonarcissus MK-2014 OX=1540222 GN=N4OMT3 PE=2 SV=1 |
| XYLA_ARATH | Xylose isomerase OS=Arabidopsis thaliana OX=3702 GN=XYLA PE=2 SV=2 |
| SPDS2_ARATH | Spermidine synthase 2 OS=Arabidopsis thaliana OX=3702 GN=SPDSYN2 PE=1 SV=2 |
| TPIS_COPJA | Triosephosphate isomerase, cytosolic OS=Coptis japonica OX=3442 PE=2 SV=1 |
| ACT2_ARATH | Actin-2 OS=Arabidopsis thaliana OX=3702 GN=ACT2 PE=1 SV=1 |
| AL2B4_ARATH | Aldehyde dehydrogenase family 2 member B4, mitochondrial OS=Arabidopsis thaliana OX=3702 GN=ALDH2B4 PE=1 SV=1 |
| ADH2_SOLTU | Alcohol dehydrogenase 2 OS=Solanum tuberosum OX=4113 GN=ADH2 PE=2 SV=1 |
| SPDE_SOLLC | Spermidine synthase OS=Solanum lycopersicum OX=4081 GN=SPDSYN PE=2 SV=1 |
| PSA2_ORYSI | Proteasome subunit alpha type-2 OS=Oryza sativa subsp. indica OX=39946 GN=PAB1 PE=2 SV=2 |
| GLNA1_VITVI | Glutamine synthetase cytosolic isozyme 1 OS=Vitis vinifera OX=29760 GN=GS1-1 PE=2 SV=1 |
| 1433D_TOBAC | 14-3-3-like protein D OS=Nicotiana tabacum OX=4097 PE=2 SV=1 |
| AGAL_ORYSJ | Alpha-galactosidase OS=Oryza sativa subsp. japonica OX=39947 GN=Os10g0493600 PE=1 SV=1 |
| HST_TOBAC | Shikimate O-hydroxycinnamoyltransferase OS=Nicotiana tabacum OX=4097 GN=HST PE=1 SV=1 |
| BALDH_ANTMA | Benzaldehyde dehydrogenase, mitochondrial OS=Antirrhinum majus OX=4151 GN=BALDH PE=1 SV=1 |
| PSA1A_ARATH | Proteasome subunit alpha type-1-A OS=Arabidopsis thaliana OX=3702 GN=PAF1 PE=1 SV=3 |
| TBB2_PEA | Tubulin beta-2 chain (Fragment) OS=Pisum sativum OX=3888 GN=TUBB2 PE=2 SV=1 |
| CALM3_PETHY | Calmodulin-related protein OS=Petunia hybrida OX=4102 GN=CAM53 PE=2 SV=2 |
| THI42_VITVI | Thiamine thiazole synthase 2, chloroplastic OS=Vitis vinifera OX=29760 GN=THI1-2 PE=3 SV=1 |
| AAT1_ARATH | Aspartate aminotransferase, mitochondrial OS=Arabidopsis thaliana OX=3702 GN=ASP1 PE=1 SV=1 |
| CAPP_PEA | Phosphoenolpyruvate carboxylase OS=Pisum sativum OX=3888 PE=2 SV=1 |
| PME2_ARATH | Pectinesterase 2 OS=Arabidopsis thaliana OX=3702 GN=PME2 PE=2 SV=2 |
| MDHP_ARATH | Malate dehydrogenase, chloroplastic OS=Arabidopsis thaliana OX=3702 GN=At3g47520 PE=1 SV=1 |
| ACT1_ARATH | Actin-1 OS=Arabidopsis thaliana OX=3702 GN=ACT1 PE=1 SV=1 |
| ACT1_SOLLC | Actin-41 (Fragment) OS=Solanum lycopersicum OX=4081 PE=3 SV=1 |
| RGP1_PHODC | Probable UDP-arabinopyranose mutase 1 (Fragments) OS=Phoenix dactylifera OX=42345 PE=1 SV=1 |
| NQR1_ORYSJ | Probable NADPH:quinone oxidoreductase 1 OS=Oryza sativa subsp. japonica OX=39947 GN=Os01g0953600 PE=2 SV=1 |
| PER_GINBI | Peroxidase (Fragments) OS=Ginkgo biloba OX=3311 PE=1 SV=1 |
| 1433B_VICFA | 14-3-3-like protein B OS=Vicia faba OX=3906 PE=2 SV=1 |
| FABI1_ORYSJ | Enoyl-[acyl-carrier-protein] reductase [NADH] 1, chloroplastic OS=Oryza sativa subsp. japonica OX=39947 GN=Os08g0327400 PE=2 SV=1 |
| NILP3_ARATH | Omega-amidase, chloroplastic OS=Arabidopsis thaliana OX=3702 GN=NLP3 PE=1 SV=1 |
| PSB6_TOBAC | Proteasome subunit beta type-6 OS=Nicotiana tabacum OX=4097 PE=2 SV=1 |
| PPA26_ARATH | Bifunctional purple acid phosphatase 26 OS=Arabidopsis thaliana OX=3702 GN=PAP26 PE=1 SV=1 |
| GLNA1_MAIZE | Glutamine synthetase root isozyme 1 OS=Zea mays OX=4577 GN=GLN6 PE=2 SV=1 |
| H2B_GOSHI | Histone H2B OS=Gossypium hirsutum OX=3635 GN=HIS2B PE=2 SV=3 |
| HPPR_PLESU | Hydroxyphenylpyruvate reductase OS=Plectranthus scutellarioides OX=4142 GN=HPPR PE=1 SV=2 |
| DAPAT_ARATH | LL-diaminopimelate aminotransferase, chloroplastic OS=Arabidopsis thaliana OX=3702 GN=DAP PE=1 SV=1 |
| KPYC_SOYBN | Pyruvate kinase, cytosolic isozyme OS=Glycine max OX=3847 PE=2 SV=1 |
| UGE5_ARATH | UDP-glucose 4-epimerase 5 OS=Arabidopsis thaliana OX=3702 GN=UGE5 PE=1 SV=3 |
| HEM61_ARATH | Coproporphyrinogen-III oxidase 1, chloroplastic OS=Arabidopsis thaliana OX=3702 GN=CPX1 PE=2 SV=1 |
| G6PD_SOLTU | Glucose-6-phosphate 1-dehydrogenase, cytoplasmic isoform OS=Solanum tuberosum OX=4113 GN=G6PDH PE=1 SV=1 |
| DCE2_ARATH | Glutamate decarboxylase 2 OS=Arabidopsis thaliana OX=3702 GN=GAD2 PE=1 SV=1 |
| RSSA_BRANA | 40S ribosomal protein SA OS=Brassica napus OX=3708 GN=LRP PE=2 SV=1 |
| TKTC1_ARATH | Transketolase-1, chloroplastic OS=Arabidopsis thaliana OX=3702 GN=TKL-1 PE=1 SV=1 |
| RS24_ARATH | 40S ribosomal protein S2-4 OS=Arabidopsis thaliana OX=3702 GN=RPS2D PE=2 SV=1 |
| GATP_ARATH | Gamma-aminobutyrate transaminase POP2, mitochondrial OS=Arabidopsis thaliana OX=3702 GN=POP2 PE=1 SV=1 |
| GME_ARATH | GDP-mannose 3,5-epimerase OS=Arabidopsis thaliana OX=3702 GN=At5g28840 PE=1 SV=1 |
| 14310_ARATH | 14-3-3-like protein GF14 epsilon OS=Arabidopsis thaliana OX=3702 GN=GRF10 PE=1 SV=1 |
| RAD2B_ARATH | Ras-related protein RABD2b OS=Arabidopsis thaliana OX=3702 GN=RABD2B PE=1 SV=1 |
| RL123_ARATH | 60S ribosomal protein L12-3 OS=Arabidopsis thaliana OX=3702 GN=RPL12C PE=2 SV=1 |
| RAD2A_ARATH | Ras-related protein RABD2a OS=Arabidopsis thaliana OX=3702 GN=RABD2A PE=1 SV=3 |
| MANA3_ARATH | Probable alpha-mannosidase At5g66150 OS=Arabidopsis thaliana OX=3702 GN=At5g66150 PE=3 SV=1 |
| SKU5_ARATH | Monocopper oxidase-like protein SKU5 OS=Arabidopsis thaliana OX=3702 GN=SKU5 PE=1 SV=1 |
| G6PIA_ORYSJ | Glucose-6-phosphate isomerase, cytosolic A OS=Oryza sativa subsp. japonica OX=39947 GN=Os03g0776000 PE=1 SV=2 |
| AGAL1_ARATH | Alpha-galactosidase 1 OS=Arabidopsis thaliana OX=3702 GN=AGAL1 PE=2 SV=1 |
| PPA27_ARATH | Probable inactive purple acid phosphatase 27 OS=Arabidopsis thaliana OX=3702 GN=PAP27 PE=2 SV=1 |
| IPYR4_ARATH | Soluble inorganic pyrophosphatase 4 OS=Arabidopsis thaliana OX=3702 GN=PPA4 PE=1 SV=1 |
| BXL4_ARATH | Beta-D-xylosidase 4 OS=Arabidopsis thaliana OX=3702 GN=BXL4 PE=1 SV=1 |
| EGS1_PETHY | Eugenol synthase 1 OS=Petunia hybrida OX=4102 GN=EGS1 PE=1 SV=1 |
| SUCA_ORYSJ | Succinate--CoA ligase [ADP-forming] subunit alpha, mitochondrial OS=Oryza sativa subsp. japonica OX=39947 GN=Os07g0577700 PE=1 SV=1 |
| SUCB_ORYSJ | Succinate--CoA ligase [ADP-forming] subunit beta, mitochondrial OS=Oryza sativa subsp. japonica OX=39947 GN=Os02g0621700 PE=1 SV=1 |
| TRXB1_ARATH | Thioredoxin reductase 1, mitochondrial OS=Arabidopsis thaliana OX=3702 GN=NTR1 PE=1 SV=3 |
| SIR1_TOBAC | Sulfite reductase 1 [ferredoxin], chloroplastic OS=Nicotiana tabacum OX=4097 GN=SIR1 PE=1 SV=1 |
| FAH_ARATH | Fumarylacetoacetase OS=Arabidopsis thaliana OX=3702 GN=FAH PE=1 SV=1 |
| NDK_CAPAN | Nucleoside diphosphate kinase OS=Capsicum annuum OX=4072 PE=2 SV=1 |
| IPYR_MAIZE | Soluble inorganic pyrophosphatase OS=Zea mays OX=4577 GN=IPP PE=2 SV=1 |
| SPDS1_PEA | Spermidine synthase 1 OS=Pisum sativum OX=3888 GN=SPDSYN1 PE=2 SV=1 |
| HBL1_MEDSA | Non-symbiotic hemoglobin 1 OS=Medicago sativa OX=3879 GN=MHB1 PE=2 SV=1 |
| PSB7B_ARATH | Proteasome subunit beta type-7-B OS=Arabidopsis thaliana OX=3702 GN=PBB2 PE=1 SV=2 |
| SIR_PEA | Sulfite reductase [ferredoxin], chloroplastic OS=Pisum sativum OX=3888 GN=SIR PE=1 SV=2 |
| G6PI1_CLAAR | Glucose-6-phosphate isomerase, cytosolic 1 OS=Clarkia arcuata OX=50280 GN=PGIC1 PE=3 SV=1 |
| APX2_ORYSJ | L-ascorbate peroxidase 2, cytosolic OS=Oryza sativa subsp. japonica OX=39947 GN=APX2 PE=1 SV=1 |
| TBA1_GOSHI | Tubulin alpha-1 chain OS=Gossypium hirsutum OX=3635 PE=2 SV=1 |
| COMT2_OCIBA | Caffeic acid 3-O-methyltransferase 2 OS=Ocimum basilicum OX=39350 GN=COMT2 PE=2 SV=1 |
| SIR_ARATH | Assimilatory sulfite reductase (ferredoxin), chloroplastic OS=Arabidopsis thaliana OX=3702 GN=SIR PE=1 SV=1 |
| OOPDA_ARATH | Organellar oligopeptidase A, chloroplastic/mitochondrial OS=Arabidopsis thaliana OX=3702 GN=OOP PE=1 SV=1 |
| CAPP1_ARATH | Phosphoenolpyruvate carboxylase 1 OS=Arabidopsis thaliana OX=3702 GN=PPC1 PE=1 SV=1 |
| UP06_DAUCA | Unknown protein 6 (Fragment) OS=Daucus carota OX=4039 PE=1 SV=1 |
| PER16_ARATH | Peroxidase 16 OS=Arabidopsis thaliana OX=3702 GN=PER16 PE=1 SV=2 |
| F16P2_BRANA | Fructose-1,6-bisphosphatase, cytosolic OS=Brassica napus OX=3708 PE=2 SV=1 |
| AMPL2_SOLLC | Leucine aminopeptidase 2, chloroplastic OS=Solanum lycopersicum OX=4081 GN=LAPA2 PE=2 SV=1 |
| PSA6A_ARATH | Proteasome subunit alpha type-6-A OS=Arabidopsis thaliana OX=3702 GN=PAA1 PE=1 SV=2 |
| NDK2_TOBAC | Nucleoside diphosphate kinase 2, chloroplastic OS=Nicotiana tabacum OX=4097 GN=NDPK2 PE=1 SV=1 |
| ADK2_ARATH | Adenosine kinase 2 OS=Arabidopsis thaliana OX=3702 GN=ADK2 PE=1 SV=1 |
| MANA_LABPU | Alpha-mannosidase (Fragments) OS=Lablab purpureus OX=35936 PE=1 SV=1 |
| CGS1_ARATH | Cystathionine gamma-synthase 1, chloroplastic OS=Arabidopsis thaliana OX=3702 GN=CGS1 PE=1 SV=3 |
| PSA2A_ARATH | Proteasome subunit alpha type-2-A OS=Arabidopsis thaliana OX=3702 GN=PAB1 PE=1 SV=1 |
| RS8_ORYSJ | 40S ribosomal protein S8 OS=Oryza sativa subsp. japonica OX=39947 GN=RPS8 PE=2 SV=2 |
| NQR_SOLTU | NAD(P)H:quinone oxidoreductase OS=Solanum tuberosum OX=4113 PE=2 SV=1 |
| RPOC1_OSTTA | DNA-directed RNA polymerase subunit beta' OS=Ostreococcus tauri OX=70448 GN=rpoC1 PE=3 SV=1 |
| THI4_ALNGL | Thiamine thiazole synthase, chloroplastic OS=Alnus glutinosa OX=3517 GN=THI1 PE=2 SV=1 |
| AL121_ARATH | Delta-1-pyrroline-5-carboxylate dehydrogenase 12A1, mitochondrial OS=Arabidopsis thaliana OX=3702 GN=ALDH12A1 PE=1 SV=1 |
| H2B1_WHEAT | Histone H2B.1 OS=Triticum aestivum OX=4565 PE=1 SV=3 |
| GLYP3_ARATH | Serine hydroxymethyltransferase 3, chloroplastic OS=Arabidopsis thaliana OX=3702 GN=SHM3 PE=1 SV=2 |
| EBF2_ARATH | EIN3-binding F-box protein 2 OS=Arabidopsis thaliana OX=3702 GN=EBF2 PE=1 SV=1 |
| PLDA3_ARATH | Phospholipase D alpha 3 OS=Arabidopsis thaliana OX=3702 GN=PLDALPHA3 PE=2 SV=1 |
| RAB7_MESCR | Ras-related protein Rab7A OS=Mesembryanthemum crystallinum OX=3544 PE=2 SV=1 |
| CARB_ARATH | Carbamoyl-phosphate synthase large chain, chloroplastic OS=Arabidopsis thaliana OX=3702 GN=CARB PE=1 SV=1 |
| RL12_PRUAR | 60S ribosomal protein L12 OS=Prunus armeniaca OX=36596 GN=RPL12 PE=2 SV=1 |
| GALE2_CYATE | UDP-glucose 4-epimerase GEPI48 OS=Cyamopsis tetragonoloba OX=3832 PE=2 SV=1 |
| OPR7_ORYSJ | 12-oxophytodienoate reductase 7 OS=Oryza sativa subsp. japonica OX=39947 GN=OPR7 PE=1 SV=1 |
| PUR5_ARATH | Phosphoribosylformylglycinamidine cyclo-ligase, chloroplastic OS=Arabidopsis thaliana OX=3702 GN=PUR5 PE=1 SV=2 |
| HSP7S_SPIOL | Stromal 70 kDa heat shock-related protein, chloroplastic (Fragment) OS=Spinacia oleracea OX=3562 GN=CHSP70 PE=2 SV=1 |
| THIC1_ARATH | Acetyl-CoA acetyltransferase, cytosolic 1 OS=Arabidopsis thaliana OX=3702 GN=AAT1 PE=1 SV=1 |
| ACO2M_ARATH | Aconitate hydratase 2, mitochondrial OS=Arabidopsis thaliana OX=3702 GN=ACO2 PE=1 SV=3 |
| MAX2A_PETHY | F-box/LRR-repeat MAX2 homolog A OS=Petunia hybrida OX=4102 GN=MAX2A PE=1 SV=1 |
| GCSPA_FLAPR | Glycine dehydrogenase (decarboxylating) A, mitochondrial OS=Flaveria pringlei OX=4226 GN=GDCSPA PE=2 SV=1 |
| ALDH_LINUS | Probable aldehyde dehydrogenase OS=Linum usitatissimum OX=4006 GN=FIS1 PE=2 SV=1 |
| TPIC_SECCE | Triosephosphate isomerase, chloroplastic OS=Secale cereale OX=4550 PE=1 SV=1 |
| JAL25_ARATH | Jacalin-related lectin 25 OS=Arabidopsis thaliana OX=3702 GN=JAL25 PE=2 SV=1 |
| GDI1_ARATH | Guanosine nucleotide diphosphate dissociation inhibitor 1 OS=Arabidopsis thaliana OX=3702 GN=GDI1 PE=1 SV=1 |
| THI43_PHYPA | Thiamine thiazole synthase 3, chloroplastic OS=Physcomitrium patens OX=3218 GN=THI1-3 PE=3 SV=1 |
| ANX1_GOSHI | Annexin Gh1 (Fragment) OS=Gossypium hirsutum OX=3635 GN=AnnGh1 PE=1 SV=2 |
| CALM_WHEAT | Calmodulin OS=Triticum aestivum OX=4565 PE=1 SV=3 |
| PSB1_PETHY | Proteasome subunit beta type-1 OS=Petunia hybrida OX=4102 GN=PBF1 PE=2 SV=1 |
| CAPP3_ARATH | Phosphoenolpyruvate carboxylase 3 OS=Arabidopsis thaliana OX=3702 GN=PPC3 PE=1 SV=2 |
| PSMD6_ARATH | 26S proteasome non-ATPase regulatory subunit 6 homolog OS=Arabidopsis thaliana OX=3702 GN=RPN7 PE=1 SV=1 |
| AAE13_ARATH | Malonate--CoA ligase OS=Arabidopsis thaliana OX=3702 GN=AAE13 PE=1 SV=2 |
| PSA6B_ARATH | Proteasome subunit alpha type-6-B OS=Arabidopsis thaliana OX=3702 GN=PAA2 PE=1 SV=1 |
| PDI21_ORYSJ | Protein disulfide isomerase-like 2-1 OS=Oryza sativa subsp. japonica OX=39947 GN=PDIL2-1 PE=2 SV=2 |
| TCTP_ORYSJ | Translationally-controlled tumor protein homolog OS=Oryza sativa subsp. japonica OX=39947 GN=TCTP PE=1 SV=1 |
| CATA1_SOYBN | Catalase-1/2 OS=Glycine max OX=3847 GN=CAT1 PE=2 SV=1 |
| DNPEP_RICCO | Probable aspartyl aminopeptidase OS=Ricinus communis OX=3988 GN=RCOM_1506700 PE=2 SV=2 |
| G6PD6_ARATH | Glucose-6-phosphate 1-dehydrogenase 6, cytoplasmic OS=Arabidopsis thaliana OX=3702 GN=G6PD6 PE=1 SV=1 |
| PME_ACTDE | Pectinesterase OS=Actinidia deliciosa OX=3627 PE=1 SV=1 |
| F26G_SOLTO | Furostanol glycoside 26-O-beta-glucosidase (Fragments) OS=Solanum torvum OX=119830 PE=1 SV=1 |
| RLA01_ARATH | 60S acidic ribosomal protein P0-1 OS=Arabidopsis thaliana OX=3702 GN=RPP0A PE=1 SV=1 |
| GSDA_ARATH | Guanosine deaminase OS=Arabidopsis thaliana OX=3702 GN=GSDA PE=1 SV=1 |
| RL141_ARATH | 60S ribosomal protein L14-1 OS=Arabidopsis thaliana OX=3702 GN=RPL14A PE=2 SV=1 |
| ALAT1_ARATH | Alanine aminotransferase 1, mitochondrial OS=Arabidopsis thaliana OX=3702 GN=ALAAT1 PE=1 SV=1 |
| MANA_CANEN | Alpha-mannosidase OS=Canavalia ensiformis OX=3823 PE=1 SV=1 |
| BBE12_ARATH | Berberine bridge enzyme-like 12 OS=Arabidopsis thaliana OX=3702 GN=At1g30740 PE=2 SV=1 |
| THIC2_ARATH | Probable acetyl-CoA acetyltransferase, cytosolic 2 OS=Arabidopsis thaliana OX=3702 GN=At5g47720 PE=2 SV=1 |
| EF1G2_ARATH | Probable elongation factor 1-gamma 2 OS=Arabidopsis thaliana OX=3702 GN=At1g57720 PE=1 SV=1 |
| PFPA_RICCO | Pyrophosphate--fructose 6-phosphate 1-phosphotransferase subunit alpha OS=Ricinus communis OX=3988 GN=PFP-ALPHA PE=3 SV=1 |
| OPLA_ARATH | 5-oxoprolinase 1 OS=Arabidopsis thaliana OX=3702 GN=OXP1 PE=1 SV=1 |
| BBE21_ARATH | Berberine bridge enzyme-like 21 OS=Arabidopsis thaliana OX=3702 GN=At4g20840 PE=2 SV=1 |
| HIPL1_ARATH | HIPL1 protein OS=Arabidopsis thaliana OX=3702 GN=HIPL1 PE=3 SV=2 |
| GL16_ARATH | Germin-like protein subfamily 1 member 6 OS=Arabidopsis thaliana OX=3702 GN=At3g04200 PE=2 SV=1 |
| CYC_ARUMA | Cytochrome c OS=Arum maculatum OX=4458 PE=1 SV=1 |
| P2_ARATH | NADP-dependent alkenal double bond reductase P2 OS=Arabidopsis thaliana OX=3702 GN=P2 PE=2 SV=2 |
| SQD1_ARATH | UDP-sulfoquinovose synthase, chloroplastic OS=Arabidopsis thaliana OX=3702 GN=SQD1 PE=1 SV=1 |
| UP01_CAPAA | Unknown protein 1 (Fragment) OS=Capsicum annuum var. annuum OX=40321 PE=1 SV=1 |
| FDH_HORVU | Formate dehydrogenase, mitochondrial OS=Hordeum vulgare OX=4513 PE=2 SV=1 |
| GSTF8_ARATH | Glutathione S-transferase F8, chloroplastic OS=Arabidopsis thaliana OX=3702 GN=GSTF8 PE=1 SV=3 |
| EGS2_CLABR | Eugenol synthase 2 OS=Clarkia breweri OX=36903 GN=EGS2 PE=1 SV=1 |
| NACA3_ARATH | Nascent polypeptide-associated complex subunit alpha-like protein 3 OS=Arabidopsis thaliana OX=3702 GN=At5g13850 PE=1 SV=1 |
| INV2_ORYSI | Beta-fructofuranosidase, insoluble isoenzyme 2 OS=Oryza sativa subsp. indica OX=39946 GN=CIN2 PE=2 SV=2 |
| TALDO_CAPAA | Transaldolase (Fragments) OS=Capsicum annuum var. annuum OX=40321 PE=1 SV=1 |
| IF4A1_ARATH | Eukaryotic initiation factor 4A-1 OS=Arabidopsis thaliana OX=3702 GN=EIF4A1 PE=1 SV=1 |
| G6PD5_ARATH | Glucose-6-phosphate 1-dehydrogenase 5, cytoplasmic OS=Arabidopsis thaliana OX=3702 GN=G6PD5 PE=1 SV=1 |
| GCSP2_ARATH | Glycine dehydrogenase (decarboxylating) 2, mitochondrial OS=Arabidopsis thaliana OX=3702 GN=GLDP2 PE=1 SV=1 |
| LEUC_ARATH | 3-isopropylmalate dehydratase large subunit, chloroplastic OS=Arabidopsis thaliana OX=3702 GN=IIL1 PE=1 SV=1 |
| PPA24_ARATH | Probable inactive purple acid phosphatase 24 OS=Arabidopsis thaliana OX=3702 GN=PAP24 PE=2 SV=1 |
| HS905_ARATH | Heat shock protein 90-5, chloroplastic OS=Arabidopsis thaliana OX=3702 GN=HSP90-5 PE=1 SV=1 |
| RL182_ARATH | 60S ribosomal protein L18-2 OS=Arabidopsis thaliana OX=3702 GN=RPL18B PE=1 SV=2 |
| AKRC9_ARATH | NADPH-dependent aldo-keto reductase, chloroplastic OS=Arabidopsis thaliana OX=3702 GN=AKR4C9 PE=1 SV=1 |
| SODM1_ARATH | Superoxide dismutase [Mn] 1, mitochondrial OS=Arabidopsis thaliana OX=3702 GN=MSD1 PE=1 SV=2 |
| CADH4_ARATH | Cinnamyl alcohol dehydrogenase 4 OS=Arabidopsis thaliana OX=3702 GN=CAD4 PE=1 SV=1 |
| METC_ARATH | Cystathionine beta-lyase, chloroplastic OS=Arabidopsis thaliana OX=3702 GN=At3g57050 PE=1 SV=1 |
| FKB62_ARATH | Peptidyl-prolyl cis-trans isomerase FKBP62 OS=Arabidopsis thaliana OX=3702 GN=FKBP62 PE=1 SV=2 |
| OPRL1_ARATH | Putative 12-oxophytodienoate reductase-like protein 1 OS=Arabidopsis thaliana OX=3702 GN=At1g09400 PE=2 SV=2 |
| LOX3_ORYSJ | Putative linoleate 9S-lipoxygenase 3 OS=Oryza sativa subsp. japonica OX=39947 GN=Os03g0700400 PE=3 SV=1 |
| GLYM1_FLAPR | Serine hydroxymethyltransferase 1, mitochondrial OS=Flaveria pringlei OX=4226 PE=2 SV=1 |
| PUR4_ARATH | Probable phosphoribosylformylglycinamidine synthase, chloroplastic/mitochondrial OS=Arabidopsis thaliana OX=3702 GN=At1g74260 PE=2 SV=3 |
| SDHA_ORYSJ | Succinate dehydrogenase [ubiquinone] flavoprotein subunit, mitochondrial OS=Oryza sativa subsp. japonica OX=39947 GN=SDH1 PE=1 SV=1 |
| NRL4A_LUPAN | Bifunctional nitrilase/nitrile hydratase NIT4A OS=Lupinus angustifolius OX=3871 GN=NIT4A PE=1 SV=1 |
| LTG21_ARATH | Non-specific lipid transfer protein GPI-anchored 21 OS=Arabidopsis thaliana OX=3702 GN=LTPG21 PE=2 SV=1 |
| FUM1_ARATH | Fumarate hydratase 1, mitochondrial OS=Arabidopsis thaliana OX=3702 GN=FUM1 PE=1 SV=2 |
| GSTUJ_ARATH | Glutathione S-transferase U19 OS=Arabidopsis thaliana OX=3702 GN=GSTU19 PE=1 SV=1 |
| PRX2B_ARATH | Peroxiredoxin-2B OS=Arabidopsis thaliana OX=3702 GN=PRXIIB PE=1 SV=1 |
| ARGC_ORYSJ | Probable N-acetyl-gamma-glutamyl-phosphate reductase, chloroplastic OS=Oryza sativa subsp. japonica OX=39947 GN=Os03g0617900 PE=1 SV=1 |
| DJ1D_ARATH | Protein DJ-1 homolog D OS=Arabidopsis thaliana OX=3702 GN=DJ1D PE=1 SV=1 |
| CLAH2_ARATH | Clathrin heavy chain 2 OS=Arabidopsis thaliana OX=3702 GN=CHC2 PE=1 SV=1 |
| PCKA1_ARATH | Phosphoenolpyruvate carboxykinase (ATP) 1 OS=Arabidopsis thaliana OX=3702 GN=PCK1 PE=1 SV=1 |
| RS33_ARATH | 40S ribosomal protein S3-3 OS=Arabidopsis thaliana OX=3702 GN=RPS3C PE=1 SV=1 |
| PCKA2_ARATH | Phosphoenolpyruvate carboxykinase (ATP) 2 OS=Arabidopsis thaliana OX=3702 GN=PCK2 PE=1 SV=1 |
| GALE1_CYATE | UDP-glucose 4-epimerase GEPI42 OS=Cyamopsis tetragonoloba OX=3832 PE=2 SV=1 |
| PDI12_ARATH | Protein disulfide isomerase-like 1-2 OS=Arabidopsis thaliana OX=3702 GN=PDIL1-2 PE=2 SV=1 |
| APT3_ARATH | Adenine phosphoribosyltransferase 3 OS=Arabidopsis thaliana OX=3702 GN=APT3 PE=1 SV=1 |
| KDSA2_ARATH | 2-dehydro-3-deoxyphosphooctonate aldolase 2 OS=Arabidopsis thaliana OX=3702 GN=KDSA2 PE=1 SV=1 |
| PLPD2_ARATH | Dihydrolipoyl dehydrogenase 2, chloroplastic OS=Arabidopsis thaliana OX=3702 GN=LPD2 PE=2 SV=2 |
| CYL2_ARATH | Cyclase-like protein 2 OS=Arabidopsis thaliana OX=3702 GN=CYCLASE2 PE=2 SV=1 |
| USP_ARATH | UDP-sugar pyrophosphorylase OS=Arabidopsis thaliana OX=3702 GN=USP PE=1 SV=1 |
| OTC_PEA | Ornithine carbamoyltransferase, chloroplastic OS=Pisum sativum OX=3888 GN=ARGF PE=2 SV=1 |
| PSD2A_ARATH | 26S proteasome non-ATPase regulatory subunit 2 homolog A OS=Arabidopsis thaliana OX=3702 GN=RPN1A PE=1 SV=2 |
| PPA1_ARATH | Probable inactive purple acid phosphatase 1 OS=Arabidopsis thaliana OX=3702 GN=PAP1 PE=2 SV=1 |
| KPYC_SOLTU | Pyruvate kinase, cytosolic isozyme OS=Solanum tuberosum OX=4113 PE=2 SV=1 |
| SBT15_ARATH | Subtilisin-like protease SBT1.5 OS=Arabidopsis thaliana OX=3702 GN=SBT1.5 PE=2 SV=1 |
| ODO2B_ARATH | Dihydrolipoyllysine-residue succinyltransferase component of 2-oxoglutarate dehydrogenase complex 2, mitochondrial OS=Arabidopsis thaliana OX=3702 GN=At4g26910 PE=1 SV=2 |
| ICDHP_ARATH | Isocitrate dehydrogenase [NADP], chloroplastic/mitochondrial OS=Arabidopsis thaliana OX=3702 GN=At5g14590 PE=1 SV=1 |
| DBR2_ARTAN | Artemisinic aldehyde Delta(11(13)) reductase OS=Artemisia annua OX=35608 GN=DBR2 PE=1 SV=2 |
| G6PI_SPIOL | Glucose-6-phosphate isomerase, cytosolic OS=Spinacia oleracea OX=3562 GN=PGIC PE=2 SV=2 |
| RS202_ARATH | 40S ribosomal protein S20-2 OS=Arabidopsis thaliana OX=3702 GN=RPS20B PE=2 SV=1 |
| ATPB_CRETR | ATP synthase subunit beta, chloroplastic OS=Cressa truxillensis OX=197373 GN=atpB PE=3 SV=1 |
| ALFP1_ARATH | Fructose-bisphosphate aldolase 1, chloroplastic OS=Arabidopsis thaliana OX=3702 GN=FBA1 PE=1 SV=2 |
| PME34_ARATH | Probable pectinesterase/pectinesterase inhibitor 34 OS=Arabidopsis thaliana OX=3702 GN=PME34 PE=2 SV=1 |
| IQD16_ARATH | Protein IQ-DOMAIN 16 OS=Arabidopsis thaliana OX=3702 GN=IQD16 PE=1 SV=1 |
| GLNA2_MEDSA | Glutamine synthetase leaf isozyme, chloroplastic OS=Medicago sativa OX=3879 GN=GS2 PE=2 SV=1 |
| PROF_CITLA | Profilin OS=Citrullus lanatus OX=3654 PE=1 SV=1 |
| P21_SOYBN | Protein P21 OS=Glycine max OX=3847 PE=1 SV=1 |
| RRAA3_ARATH | Putative 4-hydroxy-4-methyl-2-oxoglutarate aldolase 3 OS=Arabidopsis thaliana OX=3702 GN=At5g56260 PE=1 SV=1 |
| HPPD_PLESU | 4-hydroxyphenylpyruvate dioxygenase OS=Plectranthus scutellarioides OX=4142 PE=2 SV=1 |
| PGP1A_ARATH | Phosphoglycolate phosphatase 1A, chloroplastic OS=Arabidopsis thaliana OX=3702 GN=PGLP1A PE=1 SV=1 |
| IDI2_CLABR | Isopentenyl-diphosphate Delta-isomerase II OS=Clarkia breweri OX=36903 GN=IPI2 PE=3 SV=2 |
| PCKA_CUCSA | Phosphoenolpyruvate carboxykinase (ATP) OS=Cucumis sativus OX=3659 GN=PCK PE=2 SV=1 |
| RL17_MAIZE | 60S ribosomal protein L17 OS=Zea mays OX=4577 GN=RPL17 PE=2 SV=1 |
| XYL1_ARATH | Alpha-xylosidase 1 OS=Arabidopsis thaliana OX=3702 GN=XYL1 PE=1 SV=1 |
| ERD14_ARATH | Dehydrin ERD14 OS=Arabidopsis thaliana OX=3702 GN=ERD14 PE=1 SV=1 |
| RS5_CICAR | 40S ribosomal protein S5 (Fragment) OS=Cicer arietinum OX=3827 GN=RPS5 PE=2 SV=1 |
| AGAL2_ARATH | Alpha-galactosidase 2 OS=Arabidopsis thaliana OX=3702 GN=AGAL2 PE=1 SV=1 |
| AMPL1_ORYSJ | Putative leucine aminopeptidase 1 OS=Oryza sativa subsp. japonica OX=39947 GN=Os12g0434400 PE=3 SV=2 |
| UGDH4_ORYSJ | UDP-glucose 6-dehydrogenase 4 OS=Oryza sativa subsp. japonica OX=39947 GN=UGD4 PE=2 SV=1 |
| AKRC8_ARATH | Aldo-keto reductase family 4 member C8 OS=Arabidopsis thaliana OX=3702 GN=AKR4C8 PE=1 SV=2 |
| SUS_BETVU | Sucrose synthase (Fragment) OS=Beta vulgaris OX=161934 GN=SS1 PE=2 SV=1 |
| AADH2_SOLLC | Aminoaldehyde dehydrogenase 2 OS=Solanum lycopersicum OX=4081 GN=AMADH2 PE=1 SV=2 |
| DBR1_ORYSJ | Lariat debranching enzyme OS=Oryza sativa subsp. japonica OX=39947 GN=DBR1 PE=2 SV=1 |
| THRC_SOLTU | Threonine synthase, chloroplastic OS=Solanum tuberosum OX=4113 PE=2 SV=1 |
| PRS6A_SOLLC | 26S proteasome regulatory subunit 6A homolog OS=Solanum lycopersicum OX=4081 GN=TBP1 PE=2 SV=1 |
| RL11_ORYSI | 60S ribosomal protein L11 OS=Oryza sativa subsp. indica OX=39946 GN=RPL11 PE=2 SV=2 |
| PER4_VITVI | Peroxidase 4 OS=Vitis vinifera OX=29760 GN=GSVIVT00023967001 PE=1 SV=1 |
| SBT48_ARATH | Subtilisin-like protease SBT4.8 OS=Arabidopsis thaliana OX=3702 GN=SBT4.8 PE=3 SV=1 |
| HACL_ARATH | 2-hydroxyacyl-CoA lyase OS=Arabidopsis thaliana OX=3702 GN=HACL PE=1 SV=1 |
| GATP3_ORYSI | Probable gamma-aminobutyrate transaminase 3, mitochondrial OS=Oryza sativa subsp. indica OX=39946 GN=OsI_28220 PE=3 SV=1 |
| RGP2_ORYSJ | Probable inactive UDP-arabinopyranose mutase 2 OS=Oryza sativa subsp. japonica OX=39947 GN=UAM2 PE=1 SV=1 |
| VATE_SPIOL | V-type proton ATPase subunit E OS=Spinacia oleracea OX=3562 GN=VATE PE=2 SV=1 |
| BGAL_MALDO | Beta-galactosidase OS=Malus domestica OX=3750 PE=1 SV=1 |
| ORP3A_ARATH | Oxysterol-binding protein-related protein 3A OS=Arabidopsis thaliana OX=3702 GN=ORP3A PE=1 SV=1 |
| RS16_FRIAG | 40S ribosomal protein S16 OS=Fritillaria agrestis OX=64177 GN=RPS16 PE=2 SV=1 |
| CYPR1_CYNCA | Cyprosin (Fragment) OS=Cynara cardunculus OX=4265 GN=CYPRO1 PE=1 SV=2 |
| PAL1_LITER | Phenylalanine ammonia-lyase 1 OS=Lithospermum erythrorhizon OX=34254 PE=2 SV=1 |
| PDI_RICCO | Protein disulfide-isomerase OS=Ricinus communis OX=3988 PE=2 SV=1 |
| ODPB2_ORYSJ | Pyruvate dehydrogenase E1 component subunit beta-2, mitochondrial OS=Oryza sativa subsp. japonica OX=39947 GN=Os09g0509200 PE=2 SV=1 |
| LEU3_BRANA | 3-isopropylmalate dehydrogenase, chloroplastic OS=Brassica napus OX=3708 PE=2 SV=1 |
| GBLP_MEDSA | Guanine nucleotide-binding protein subunit beta-like protein OS=Medicago sativa OX=3879 GN=GB1 PE=2 SV=1 |
| PER70_MAIZE | Peroxidase 70 OS=Zea mays OX=4577 GN=PER70 PE=1 SV=1 |
| SUS3_ARATH | Sucrose synthase 3 OS=Arabidopsis thaliana OX=3702 GN=SUS3 PE=1 SV=1 |
| AL2B7_ARATH | Aldehyde dehydrogenase family 2 member B7, mitochondrial OS=Arabidopsis thaliana OX=3702 GN=ALDH2B7 PE=1 SV=2 |
| HEXO3_ARATH | Beta-hexosaminidase 3 OS=Arabidopsis thaliana OX=3702 GN=HEXO3 PE=1 SV=1 |
| UP25_PSEMZ | Unknown protein 25 (Fragments) OS=Pseudotsuga menziesii OX=3357 PE=1 SV=1 |
| RAN3_ORYSI | GTP-binding nuclear protein Ran-3 OS=Oryza sativa subsp. indica OX=39946 GN=RAN3 PE=2 SV=2 |
| OPR1_SOLLC | 12-oxophytodienoate reductase 1 OS=Solanum lycopersicum OX=4081 GN=OPR1 PE=1 SV=1 |
| PRS8A_ARATH | 26S proteasome regulatory subunit 8 homolog A OS=Arabidopsis thaliana OX=3702 GN=RPT6A PE=1 SV=1 |
| LEU32_ARATH | 3-isopropylmalate dehydrogenase 2, chloroplastic OS=Arabidopsis thaliana OX=3702 GN=IMDH2 PE=1 SV=1 |
| RL72_ARATH | 60S ribosomal protein L7-2 OS=Arabidopsis thaliana OX=3702 GN=RPL7B PE=1 SV=1 |
| ACLA3_ARATH | ATP-citrate synthase alpha chain protein 3 OS=Arabidopsis thaliana OX=3702 GN=ACLA-3 PE=2 SV=1 |
| IVD_ARATH | Isovaleryl-CoA dehydrogenase, mitochondrial OS=Arabidopsis thaliana OX=3702 GN=IVD PE=1 SV=2 |
| BXL6_ARATH | Probable beta-D-xylosidase 6 OS=Arabidopsis thaliana OX=3702 GN=BXL6 PE=2 SV=1 |
| ISPD_ORYSJ | 2-C-methyl-D-erythritol 4-phosphate cytidylyltransferase, chloroplastic OS=Oryza sativa subsp. japonica OX=39947 GN=ISPD PE=2 SV=1 |
| VPEA_ARATH | Vacuolar-processing enzyme alpha-isozyme OS=Arabidopsis thaliana OX=3702 GN=At2g25940 PE=2 SV=2 |
| CLPB4_ARATH | Chaperone protein ClpB4, mitochondrial OS=Arabidopsis thaliana OX=3702 GN=CLPB4 PE=2 SV=1 |
| RGI4_ARATH | Leucine-rich repeat receptor-like serine/threonine-protein kinase RGI4 OS=Arabidopsis thaliana OX=3702 GN=RGI4 PE=1 SV=1 |
| PDI13_ARATH | Protein disulfide isomerase-like 1-3 OS=Arabidopsis thaliana OX=3702 GN=PDIL1-3 PE=2 SV=1 |
| ENPL_CATRO | Endoplasmin homolog OS=Catharanthus roseus OX=4058 GN=HSP90 PE=2 SV=1 |
| PATL4_ARATH | Patellin-4 OS=Arabidopsis thaliana OX=3702 GN=PATL4 PE=1 SV=2 |
| RL15_PETHY | 60S ribosomal protein L15 OS=Petunia hybrida OX=4102 GN=RPL15 PE=2 SV=1 |
| ACOHC_CUCMC | Aconitate hydratase (Fragment) OS=Cucumis melo var. conomon OX=3657 GN=ACO PE=2 SV=1 |
| RD23D_ARATH | Ubiquitin receptor RAD23d OS=Arabidopsis thaliana OX=3702 GN=RAD23D PE=1 SV=2 |
| NDUV1_ARATH | NADH dehydrogenase [ubiquinone] flavoprotein 1, mitochondrial OS=Arabidopsis thaliana OX=3702 GN=At5g08530 PE=1 SV=1 |
| NDK3_ARATH | Nucleoside diphosphate kinase III, chloroplastic/mitochondrial OS=Arabidopsis thaliana OX=3702 GN=NDPK3 PE=1 SV=1 |
| MAON_SOLTU | NAD-dependent malic enzyme 59 kDa isoform, mitochondrial OS=Solanum tuberosum OX=4113 PE=1 SV=1 |
| HIBC7_ARATH | 3-hydroxyisobutyryl-CoA hydrolase-like protein 4, mitochondrial OS=Arabidopsis thaliana OX=3702 GN=At3g24360 PE=2 SV=1 |
| CAPP1_MAIZE | Phosphoenolpyruvate carboxylase 1 OS=Zea mays OX=4577 GN=PEP1 PE=1 SV=2 |
| NAGLU_ARATH | Alpha-N-acetylglucosaminidase OS=Arabidopsis thaliana OX=3702 GN=NAGLU PE=2 SV=1 |
| GL21_ARATH | Germin-like protein subfamily 2 member 1 OS=Arabidopsis thaliana OX=3702 GN=GLP4 PE=2 SV=2 |
| NDK1_ORYSI | Nucleoside diphosphate kinase 1 OS=Oryza sativa subsp. indica OX=39946 GN=NDKR PE=1 SV=1 |
| LEU1B_SOLPN | 2-isopropylmalate synthase B OS=Solanum pennellii OX=28526 GN=IPMSB PE=2 SV=1 |
| LEU31_ARATH | 3-isopropylmalate dehydrogenase 1, chloroplastic OS=Arabidopsis thaliana OX=3702 GN=IMDH1 PE=1 SV=1 |
| H32_CICIN | Histone H3.2 OS=Cichorium intybus OX=13427 PE=2 SV=3 |
| PSB5_SPIOL | Proteasome subunit beta type-5 OS=Spinacia oleracea OX=3562 PE=2 SV=1 |
| PREP1_ARATH | Presequence protease 1, chloroplastic/mitochondrial OS=Arabidopsis thaliana OX=3702 GN=PREP1 PE=1 SV=2 |
| SODC_IPOBA | Superoxide dismutase [Cu-Zn] OS=Ipomoea batatas OX=4120 GN=SODCC PE=2 SV=2 |
| PER49_ARATH | Peroxidase 49 OS=Arabidopsis thaliana OX=3702 GN=PER49 PE=2 SV=2 |
| SCRK6_ARATH | Probable fructokinase-6, chloroplastic OS=Arabidopsis thaliana OX=3702 GN=At1g66430 PE=2 SV=1 |
| PRS6B_ARATH | 26S proteasome regulatory subunit 6B homolog OS=Arabidopsis thaliana OX=3702 GN=RPT3 PE=1 SV=1 |
| BCA3_ARATH | Beta carbonic anhydrase 3 OS=Arabidopsis thaliana OX=3702 GN=BCA3 PE=2 SV=1 |
| SYGM1_ARATH | Glycine--tRNA ligase, mitochondrial 1 OS=Arabidopsis thaliana OX=3702 GN=At1g29880 PE=1 SV=1 |
| ACO12_ARATH | Putative peroxisomal acyl-coenzyme A oxidase 1.2 OS=Arabidopsis thaliana OX=3702 GN=ACX1.2 PE=2 SV=1 |
| SUS4_ORYSJ | Sucrose synthase 4 OS=Oryza sativa subsp. japonica OX=39947 GN=SUS4 PE=2 SV=1 |
| SYKC_ARATH | Lysine--tRNA ligase, cytoplasmic OS=Arabidopsis thaliana OX=3702 GN=At3g11710 PE=1 SV=1 |
| PDIA6_MEDSA | Probable protein disulfide-isomerase A6 OS=Medicago sativa OX=3879 PE=2 SV=1 |
| RL34_PEA | 60S ribosomal protein L34 OS=Pisum sativum OX=3888 GN=RPL34 PE=2 SV=1 |
| BBE26_ARATH | Berberine bridge enzyme-like 26 OS=Arabidopsis thaliana OX=3702 GN=At5g44400 PE=2 SV=1 |
| HCT_NARPS | Hydroxycinnamoyltransferase OS=Narcissus pseudonarcissus OX=39639 GN=HCT PE=2 SV=1 |
| PME3_PHAVU | Pectinesterase 3 OS=Phaseolus vulgaris OX=3885 GN=MPE3 PE=2 SV=1 |
| XYNB_PRUPE | Putative beta-D-xylosidase (Fragment) OS=Prunus persica OX=3760 PE=2 SV=1 |
| AAPC_CENCI | Putative glucose-6-phosphate 1-epimerase OS=Cenchrus ciliaris OX=35872 PE=2 SV=1 |
| RLA2A_MAIZE | 60S acidic ribosomal protein P2A OS=Zea mays OX=4577 GN=RPP2A PE=1 SV=3 |
| PFKA7_ARATH | ATP-dependent 6-phosphofructokinase 7 OS=Arabidopsis thaliana OX=3702 GN=PFK7 PE=1 SV=1 |
| RPE_ARATH | Ribulose-5-phosphate-3-epimerase, chloroplastic OS=Arabidopsis thaliana OX=3702 GN=RPE PE=2 SV=1 |
| PSD1B_ARATH | 26S proteasome non-ATPase regulatory subunit 1 homolog B OS=Arabidopsis thaliana OX=3702 GN=RPN2B PE=1 SV=1 |
| PRS7_SPIOL | 26S proteasome regulatory subunit 7 OS=Spinacia oleracea OX=3562 GN=RPT1 PE=2 SV=1 |
| RISB_SPIOL | 6,7-dimethyl-8-ribityllumazine synthase, chloroplastic OS=Spinacia oleracea OX=3562 PE=1 SV=1 |
| UBE11_WHEAT | Ubiquitin-activating enzyme E1 1 OS=Triticum aestivum OX=4565 GN=UBA1 PE=1 SV=1 |
| USP1_SOYBN | UDP-sugar pyrophosphorylase 1 OS=Glycine max OX=3847 GN=USP1 PE=1 SV=1 |
| AROA_BRANA | 3-phosphoshikimate 1-carboxyvinyltransferase, chloroplastic OS=Brassica napus OX=3708 PE=3 SV=1 |
| RL10_VITRI | 60S ribosomal protein L10 OS=Vitis riparia OX=96939 GN=RPL10 PE=2 SV=1 |
| AGUB_ORYSJ | N-carbamoylputrescine amidase OS=Oryza sativa subsp. japonica OX=39947 GN=CPA PE=2 SV=1 |
| PDXK_ARATH | Pyridoxal kinase OS=Arabidopsis thaliana OX=3702 GN=PK PE=1 SV=2 |
| GLYM_PEA | Serine hydroxymethyltransferase, mitochondrial OS=Pisum sativum OX=3888 PE=1 SV=1 |
| DDB1B_ARATH | DNA damage-binding protein 1b OS=Arabidopsis thaliana OX=3702 GN=DDB1B PE=1 SV=2 |
| FPPS2_ARATH | Farnesyl pyrophosphate synthase 2 OS=Arabidopsis thaliana OX=3702 GN=FPS2 PE=2 SV=1 |
| LAC12_ARATH | Laccase-12 OS=Arabidopsis thaliana OX=3702 GN=LAC12 PE=2 SV=1 |
| PRU1_PRUAR | Major allergen Pru ar 1 OS=Prunus armeniaca OX=36596 PE=1 SV=1 |
| PCNA1_DAUCA | Proliferating cell nuclear antigen OS=Daucus carota OX=4039 PE=3 SV=1 |
| RS4_PRUAR | 40S ribosomal protein S4 OS=Prunus armeniaca OX=36596 GN=RPS4 PE=2 SV=1 |
| ATPAM_ORYSA | ATP synthase subunit alpha, mitochondrial OS=Oryza sativa OX=4530 GN=ATPA PE=3 SV=1 |
| RS141_ARATH | 40S ribosomal protein S14-1 OS=Arabidopsis thaliana OX=3702 GN=RPS14A PE=1 SV=1 |
| RS23_EUPES | 40S ribosomal protein S23 OS=Euphorbia esula OX=3993 GN=RPS23 PE=2 SV=1 |
| RL4A_ARATH | 60S ribosomal protein L4-1 OS=Arabidopsis thaliana OX=3702 GN=RPL4A PE=1 SV=1 |
| ENO3_ARATH | Cytosolic enolase 3 OS=Arabidopsis thaliana OX=3702 GN=ENO3 PE=1 SV=1 |
| HSP02_PSEMZ | Putative heat shock protein 2 (Fragment) OS=Pseudotsuga menziesii OX=3357 PE=1 SV=1 |
| BBE9_ARATH | Berberine bridge enzyme-like 9 OS=Arabidopsis thaliana OX=3702 GN=At1g30710 PE=2 SV=1 |
| TKTA_CRAPL | Transketolase 10 OS=Craterostigma plantagineum OX=4153 GN=TKT10 PE=2 SV=1 |
| PUB25_ARATH | U-box domain-containing protein 25 OS=Arabidopsis thaliana OX=3702 GN=PUB25 PE=2 SV=1 |
| SERA3_ARATH | D-3-phosphoglycerate dehydrogenase 3, chloroplastic OS=Arabidopsis thaliana OX=3702 GN=PGDH3 PE=1 SV=1 |
| DPYS_ARATH | Dihydropyrimidinase OS=Arabidopsis thaliana OX=3702 GN=PYD2 PE=1 SV=1 |
| PPCS2_ARATH | Phosphopantothenate--cysteine ligase 2 OS=Arabidopsis thaliana OX=3702 GN=PPCS2 PE=2 SV=2 |
| APX7_ORYSJ | Probable L-ascorbate peroxidase 7, chloroplastic OS=Oryza sativa subsp. japonica OX=39947 GN=APX7 PE=2 SV=1 |
| SDC2_ORYSJ | Serine decarboxylase 2 OS=Oryza sativa subsp. japonica OX=39947 GN=Os10g0105700 PE=2 SV=1 |
| BCAT5_ARATH | Branched-chain-amino-acid aminotransferase 5, chloroplastic OS=Arabidopsis thaliana OX=3702 GN=BCAT5 PE=1 SV=1 |
| IDH5_ARATH | Isocitrate dehydrogenase [NAD] catalytic subunit 5, mitochondrial OS=Arabidopsis thaliana OX=3702 GN=IDH5 PE=1 SV=1 |
| LKHA4_ARATH | Leucine aminopeptidase OS=Arabidopsis thaliana OX=3702 GN=LKHA4 PE=2 SV=1 |
| PSA4A_ARATH | Proteasome subunit alpha type-4-A OS=Arabidopsis thaliana OX=3702 GN=PAC1 PE=1 SV=1 |
| RS3A1_VITVI | 40S ribosomal protein S3a-1 OS=Vitis vinifera OX=29760 GN=GSVIVT00020038001 PE=3 SV=1 |
| EFTU_TETOB | Elongation factor Tu, chloroplastic OS=Tetradesmus obliquus OX=3088 GN=tufA PE=3 SV=1 |
| FQR1_ARATH | NAD(P)H dehydrogenase (quinone) FQR1 OS=Arabidopsis thaliana OX=3702 GN=FQR1 PE=1 SV=1 |
| IPYR2_ARATH | Soluble inorganic pyrophosphatase 2 OS=Arabidopsis thaliana OX=3702 GN=PPA2 PE=2 SV=2 |
| SPSY_ARATH | Spermine synthase OS=Arabidopsis thaliana OX=3702 GN=SPMS PE=1 SV=1 |
| VLN1_ORYSJ | Villin-1 OS=Oryza sativa subsp. japonica OX=39947 GN=VLN1 PE=2 SV=1 |
| RL9_PEA | 60S ribosomal protein L9 OS=Pisum sativum OX=3888 GN=RPL9 PE=2 SV=1 |
| H2A_EUPES | Histone H2A OS=Euphorbia esula OX=3993 PE=2 SV=1 |
| CADH5_ORYSJ | Probable cinnamyl alcohol dehydrogenase 5 OS=Oryza sativa subsp. japonica OX=39947 GN=CAD5 PE=3 SV=2 |
| KPRS4_SPIOL | Ribose-phosphate pyrophosphokinase 4 OS=Spinacia oleracea OX=3562 GN=PRS4 PE=2 SV=1 |
| CAMT2_TOBAC | Caffeoyl-CoA O-methyltransferase 2 OS=Nicotiana tabacum OX=4097 GN=CCOAOMT2 PE=2 SV=1 |
| BEV1G_BETPN | Major pollen allergen Bet v 1-G OS=Betula pendula OX=3505 GN=BETV1G PE=1 SV=2 |
| RAH1B_ARATH | Ras-related protein RABH1b OS=Arabidopsis thaliana OX=3702 GN=RABH1B PE=1 SV=1 |
| CDC48_SOYBN | Cell division cycle protein 48 homolog OS=Glycine max OX=3847 GN=CDC48 PE=2 SV=1 |
| CYP1_SOYBN | Peptidyl-prolyl cis-trans isomerase 1 OS=Glycine max OX=3847 GN=Cyp1 PE=2 SV=1 |
| PCAP1_ARATH | Plasma membrane-associated cation-binding protein 1 OS=Arabidopsis thaliana OX=3702 GN=PCAP1 PE=1 SV=1 |
| LOXC2_ORYSJ | Probable lipoxygenase 8, chloroplastic OS=Oryza sativa subsp. japonica OX=39947 GN=CM-LOX2 PE=2 SV=1 |
| SAR1B_ARATH | GTP-binding protein SAR1B OS=Arabidopsis thaliana OX=3702 GN=SAR1B PE=1 SV=1 |
| CATA2_ORYSI | Catalase isozyme B OS=Oryza sativa subsp. indica OX=39946 GN=CATB PE=2 SV=2 |
| CLH1_ORYSJ | Clathrin heavy chain 1 OS=Oryza sativa subsp. japonica OX=39947 GN=Os11g0104900 PE=3 SV=1 |
| DCL2_ARATH | Endoribonuclease Dicer homolog 2 OS=Arabidopsis thaliana OX=3702 GN=At3g03300 PE=1 SV=2 |
| PDS5B_ARATH | Sister chromatid cohesion protein PDS5 homolog B OS=Arabidopsis thaliana OX=3702 GN=PDS5B PE=3 SV=1 |
| PS13A_ARATH | 26S proteasome non-ATPase regulatory subunit 13 homolog A OS=Arabidopsis thaliana OX=3702 GN=RPN9A PE=1 SV=1 |
| 6FEH_WHEAT | Fructan 6-exohydrolase OS=Triticum aestivum OX=4565 GN=6-FEH PE=1 SV=1 |
| PER15_IPOBA | Peroxidase 15 OS=Ipomoea batatas OX=4120 GN=pod PE=1 SV=1 |
| PGMP_ARATH | Phosphoglucomutase, chloroplastic OS=Arabidopsis thaliana OX=3702 GN=PGMP PE=1 SV=2 |
| RL3_ORYSJ | 60S ribosomal protein L3 OS=Oryza sativa subsp. japonica OX=39947 GN=RPL3 PE=2 SV=2 |
| HIS1A_ARATH | ATP phosphoribosyltransferase 1, chloroplastic OS=Arabidopsis thaliana OX=3702 GN=HISN1A PE=1 SV=1 |
| PFKA5_ARATH | ATP-dependent 6-phosphofructokinase 5, chloroplastic OS=Arabidopsis thaliana OX=3702 GN=PFK5 PE=1 SV=1 |
| AXS_ORYSJ | UDP-D-apiose/UDP-D-xylose synthase OS=Oryza sativa subsp. japonica OX=39947 GN=Os01g0969100 PE=2 SV=1 |
| RAS_PLESU | Rosmarinate synthase OS=Plectranthus scutellarioides OX=4142 GN=RAS PE=1 SV=1 |
| CSPLE_ORYSJ | CASP-like protein 2B1 OS=Oryza sativa subsp. japonica OX=39947 GN=Os12g0514300 PE=2 SV=2 |
| IF4G2_ARATH | Eukaryotic translation initiation factor isoform 4G-2 OS=Arabidopsis thaliana OX=3702 GN=EIF(ISO)4G2 PE=1 SV=1 |
| CYPH_LUPLU | Peptidyl-prolyl cis-trans isomerase OS=Lupinus luteus OX=3873 PE=2 SV=1 |
| PILS3_ARATH | Protein PIN-LIKES 3 OS=Arabidopsis thaliana OX=3702 GN=PILS3 PE=2 SV=1 |
| 1A12_CUCMA | 1-aminocyclopropane-1-carboxylate synthase CMA101 OS=Cucurbita maxima OX=3661 GN=ACS2 PE=2 SV=1 |
| PSDE_ARATH | 26S proteasome non-ATPase regulatory subunit 14 homolog OS=Arabidopsis thaliana OX=3702 GN=RPN11 PE=1 SV=1 |
| CISY_DAUCA | Citrate synthase, mitochondrial OS=Daucus carota OX=4039 GN=CS PE=2 SV=1 |
| FB348_ARATH | F-box protein At2g16365 OS=Arabidopsis thaliana OX=3702 GN=At2g16365 PE=2 SV=2 |
| CYC1_CAMAC | (S)-8-oxocitronellyl enol synthase CYC1 OS=Camptotheca acuminata OX=16922 GN=CYC1 PE=1 SV=1 |
| PSD7A_ARATH | 26S proteasome non-ATPase regulatory subunit 7 homolog A OS=Arabidopsis thaliana OX=3702 GN=RPN8A PE=1 SV=1 |
| CAS2_SOLTU | Bifunctional L-3-cyanoalanine synthase/cysteine synthase 2, mitochondrial OS=Solanum tuberosum OX=4113 GN=PCAS-2 PE=1 SV=1 |
| PSMD3_DAUCA | Probable 26S proteasome non-ATPase regulatory subunit 3 OS=Daucus carota OX=4039 GN=21D7 PE=1 SV=2 |
| MTDH_MESCR | Probable mannitol dehydrogenase OS=Mesembryanthemum crystallinum OX=3544 GN=ELI3 PE=2 SV=1 |
| PME51_ARATH | Probable pectinesterase/pectinesterase inhibitor 51 OS=Arabidopsis thaliana OX=3702 GN=PME51 PE=2 SV=1 |
| SCP50_ARATH | Serine carboxypeptidase-like 50 OS=Arabidopsis thaliana OX=3702 GN=SCPL50 PE=2 SV=1 |
| DHQS_ARATH | 3-dehydroquinate synthase, chloroplastic OS=Arabidopsis thaliana OX=3702 GN=DHQS PE=1 SV=1 |
| RS131_ARATH | 40S ribosomal protein S13-1 OS=Arabidopsis thaliana OX=3702 GN=RPS13A PE=2 SV=1 |
| COPB1_ORYSJ | Coatomer subunit beta-1 OS=Oryza sativa subsp. japonica OX=39947 GN=Os11g0174000 PE=2 SV=1 |
| OLP1_SOLLC | Osmotin-like protein OS=Solanum lycopersicum OX=4081 PE=1 SV=1 |
| ICMT_ORYSI | Probable protein-S-isoprenylcysteine O-methyltransferase OS=Oryza sativa subsp. indica OX=39946 GN=ICMT PE=3 SV=2 |
| FOX3_ARATH | Berberine bridge enzyme-like 5 OS=Arabidopsis thaliana OX=3702 GN=FOX3 PE=3 SV=1 |
| GLO5_ARATH | Glycolate oxidase 3 OS=Arabidopsis thaliana OX=3702 GN=GLO5 PE=1 SV=1 |
| HIS4_ARATH | Imidazole glycerol phosphate synthase hisHF, chloroplastic OS=Arabidopsis thaliana OX=3702 GN=HISN4 PE=2 SV=1 |
| IDE1_ARATH | Insulin-degrading enzyme-like 1, peroxisomal OS=Arabidopsis thaliana OX=3702 GN=PXM16 PE=2 SV=1 |
| MDHX2_ARATH | Malate dehydrogenase 2, peroxisomal OS=Arabidopsis thaliana OX=3702 GN=PMDH2 PE=1 SV=1 |
| RR19_PHYPA | 30S ribosomal protein S19, chloroplastic OS=Physcomitrium patens OX=3218 GN=rps19 PE=3 SV=1 |
| KAT1_PETHY | 3-ketoacyl CoA thiolase 1, peroxisomal OS=Petunia hybrida OX=4102 GN=KAT1 PE=1 SV=1 |
| ANXD1_ARATH | Annexin D1 OS=Arabidopsis thaliana OX=3702 GN=ANN1 PE=1 SV=1 |
| BADH_HORVU | Betaine aldehyde dehydrogenase OS=Hordeum vulgare OX=4513 PE=2 SV=1 |
| E133_ARATH | Glucan endo-1,3-beta-glucosidase 3 OS=Arabidopsis thaliana OX=3702 GN=At2g01630 PE=2 SV=2 |
| NU5C_RANMC | NAD(P)H-quinone oxidoreductase subunit 5, chloroplastic OS=Ranunculus macranthus OX=334596 GN=ndhF PE=3 SV=1 |
| NPC5_ARATH | Non-specific phospholipase C5 OS=Arabidopsis thaliana OX=3702 GN=NPC5 PE=1 SV=1 |
| H2AXB_ORYSI | Probable histone H2AXb OS=Oryza sativa subsp. indica OX=39946 GN=OsI_037312 PE=3 SV=1 |
| Y4967_ARATH | Uncharacterized oxidoreductase At4g09670 OS=Arabidopsis thaliana OX=3702 GN=At4g09670 PE=1 SV=1 |
| HIBC8_ARATH | 3-hydroxyisobutyryl-CoA hydrolase-like protein 5 OS=Arabidopsis thaliana OX=3702 GN=At1g06550 PE=1 SV=2 |
| ARF5_ARATH | ADP-ribosylation factor-like protein 2 OS=Arabidopsis thaliana OX=3702 GN=ARL2 PE=2 SV=1 |
| EFGC_ARATH | Elongation factor G, chloroplastic OS=Arabidopsis thaliana OX=3702 GN=CPEFG PE=1 SV=1 |
| IF5A1_SOLLC | Eukaryotic translation initiation factor 5A-1 OS=Solanum lycopersicum OX=4081 PE=2 SV=1 |
| PDS5E_ARATH | Sister chromatid cohesion protein PDS5 homolog E OS=Arabidopsis thaliana OX=3702 GN=PDS5E PE=2 SV=1 |
| CML13_ARATH | Probable calcium-binding protein CML13 OS=Arabidopsis thaliana OX=3702 GN=CML13 PE=2 SV=1 |
| PSB2A_ARATH | Proteasome subunit beta type-2-A OS=Arabidopsis thaliana OX=3702 GN=PBD1 PE=1 SV=1 |
| FBL21_ARATH | Putative F-box/LRR-repeat protein 21 OS=Arabidopsis thaliana OX=3702 GN=FBL21 PE=4 SV=1 |
| SUMO1_ARATH | Small ubiquitin-related modifier 1 OS=Arabidopsis thaliana OX=3702 GN=SUMO1 PE=1 SV=2 |
| SBT1_LOTJA | Subtilisin-like protease 1 OS=Lotus japonicus OX=34305 GN=SBTM1 PE=2 SV=1 |
| AB43G_ORYSJ | ABC transporter G family member 43 OS=Oryza sativa subsp. japonica OX=39947 GN=ABCG43 PE=2 SV=2 |
| GLN15_ARATH | Glutamine synthetase cytosolic isozyme 1-5 OS=Arabidopsis thaliana OX=3702 GN=GLN1-5 PE=1 SV=1 |
| Y5392_ARATH | Probable receptor-like protein kinase At5g39020 OS=Arabidopsis thaliana OX=3702 GN=At5g39020 PE=2 SV=1 |
| REDX1_CATRO | Protein REDOX 1 OS=Catharanthus roseus OX=4058 GN=Redox1 PE=1 SV=1 |
| PORA_ORYSJ | Protochlorophyllide reductase A, chloroplastic OS=Oryza sativa subsp. japonica OX=39947 GN=PORA PE=2 SV=1 |
| DCDA2_ARATH | Diaminopimelate decarboxylase 2, chloroplastic OS=Arabidopsis thaliana OX=3702 GN=LYSA2 PE=1 SV=1 |
| APY3_ORYSJ | Probable apyrase 3 OS=Oryza sativa subsp. japonica OX=39947 GN=APY3 PE=2 SV=2 |
| GUX3_ARATH | Putative UDP-glucuronate:xylan alpha-glucuronosyltransferase 3 OS=Arabidopsis thaliana OX=3702 GN=GUX3 PE=2 SV=1 |
| ACBP2_DIGLA | Acyl-CoA-binding protein 2 (Fragment) OS=Digitalis lanata OX=49450 PE=1 SV=2 |
| SYDC2_ARATH | Aspartate--tRNA ligase 2, cytoplasmic OS=Arabidopsis thaliana OX=3702 GN=IBI1 PE=1 SV=1 |
| EBP1_ARATH | ERBB-3 BINDING PROTEIN 1 OS=Arabidopsis thaliana OX=3702 GN=EBP1 PE=1 SV=1 |
| GLNAC_BRANA | Glutamine synthetase, chloroplastic OS=Brassica napus OX=3708 GN=GLN2 PE=2 SV=1 |
| NAP1B_ORYSI | Nucleosome assembly protein 1;2 OS=Oryza sativa subsp. indica OX=39946 GN=NAP1;2 PE=1 SV=1 |
| PSKR2_ARATH | Phytosulfokine receptor 2 OS=Arabidopsis thaliana OX=3702 GN=PSKR2 PE=1 SV=1 |
| RGP5_ARATH | Probable UDP-arabinopyranose mutase 5 OS=Arabidopsis thaliana OX=3702 GN=RGP5 PE=1 SV=1 |
| PSB3A_ARATH | Proteasome subunit beta type-3-A OS=Arabidopsis thaliana OX=3702 GN=PBC1 PE=1 SV=2 |
| TCPG_ARATH | T-complex protein 1 subunit gamma OS=Arabidopsis thaliana OX=3702 GN=CCT3 PE=1 SV=1 |
| RD23C_ARATH | Ubiquitin receptor RAD23c OS=Arabidopsis thaliana OX=3702 GN=RAD23C PE=1 SV=2 |
| PIP14_ARATH | Probable aquaporin PIP1-4 OS=Arabidopsis thaliana OX=3702 GN=PIP1.4 PE=1 SV=1 |
| SPSA4_ORYSJ | Probable sucrose-phosphate synthase 4 OS=Oryza sativa subsp. japonica OX=39947 GN=SPS4 PE=2 SV=1 |
| KASC1_ARATH | 3-oxoacyl-[acyl-carrier-protein] synthase I, chloroplastic OS=Arabidopsis thaliana OX=3702 GN=KAS1 PE=1 SV=2 |
| AB25B_ARATH | ABC transporter B family member 25, mitochondrial OS=Arabidopsis thaliana OX=3702 GN=ABCB25 PE=1 SV=1 |
| PHSH_SOLTU | Alpha-glucan phosphorylase, H isozyme OS=Solanum tuberosum OX=4113 PE=1 SV=1 |
| ASD1_ARATH | Alpha-L-arabinofuranosidase 1 OS=Arabidopsis thaliana OX=3702 GN=ASD1 PE=1 SV=1 |
| CYNS_SOYBN | Cyanate hydratase OS=Glycine max OX=3847 GN=CYN PE=2 SV=1 |
| AMPP2_ARATH | Aminopeptidase P2 OS=Arabidopsis thaliana OX=3702 GN=APP2 PE=2 SV=1 |
| IDH1_ARATH | Isocitrate dehydrogenase [NAD] regulatory subunit 1, mitochondrial OS=Arabidopsis thaliana OX=3702 GN=IDH1 PE=1 SV=2 |
| RAD23_ORYSJ | Probable ubiquitin receptor RAD23 OS=Oryza sativa subsp. japonica OX=39947 GN=RAD23 PE=1 SV=2 |
| PDI11_ORYSJ | Protein disulfide isomerase-like 1-1 OS=Oryza sativa subsp. japonica OX=39947 GN=PDIL1-1 PE=2 SV=1 |
| RT07_PROWI | Ribosomal protein S7, mitochondrial OS=Prototheca wickerhamii OX=3111 GN=RPS7 PE=3 SV=1 |
| LSM4_ARATH | Sm-like protein LSM4 OS=Arabidopsis thaliana OX=3702 GN=LSM4 PE=1 SV=1 |
| VATC_ARATH | V-type proton ATPase subunit C OS=Arabidopsis thaliana OX=3702 GN=VHA-C PE=1 SV=1 |
| DRB3_ORYSJ | Double-stranded RNA-binding protein 3 OS=Oryza sativa subsp. japonica OX=39947 GN=DRB3 PE=2 SV=1 |
| KN12D_ARATH | Kinesin-like protein KIN-12D OS=Arabidopsis thaliana OX=3702 GN=KIN12D PE=2 SV=1 |
| LRX1_ARATH | Leucine-rich repeat extensin-like protein 1 OS=Arabidopsis thaliana OX=3702 GN=LRX1 PE=1 SV=1 |
| LONM3_ARATH | Lon protease homolog 3, mitochondrial OS=Arabidopsis thaliana OX=3702 GN=LON3 PE=3 SV=1 |
| PCNA2_DAUCA | Proliferating cell nuclear antigen large form OS=Daucus carota OX=4039 PE=2 SV=1 |
| SBT21_ARATH | Subtilisin-like protease SBT2.1 OS=Arabidopsis thaliana OX=3702 GN=SBT2.1 PE=2 SV=1 |
| TRXH_RICCO | Thioredoxin H-type OS=Ricinus communis OX=3988 PE=3 SV=1 |
| CRR55_ARATH | Cysteine-rich repeat secretory protein 55 OS=Arabidopsis thaliana OX=3702 GN=CRRSP55 PE=2 SV=1 |
| DYHB_CHLRE | Dynein beta chain, flagellar outer arm OS=Chlamydomonas reinhardtii OX=3055 GN=ODA4 PE=3 SV=1 |
| MGE2_ARATH | GrpE protein homolog 2, mitochondrial OS=Arabidopsis thaliana OX=3702 GN=Mge2 PE=1 SV=1 |
| PER30_ARATH | Peroxidase 30 OS=Arabidopsis thaliana OX=3702 GN=PER30 PE=1 SV=1 |
| GAUTF_ARATH | Probable galacturonosyltransferase 15 OS=Arabidopsis thaliana OX=3702 GN=GAUT15 PE=2 SV=1 |
| TCPD_ARATH | T-complex protein 1 subunit delta OS=Arabidopsis thaliana OX=3702 GN=CCT4 PE=1 SV=1 |
| TPPII_ORYSJ | Tripeptidyl-peptidase 2 OS=Oryza sativa subsp. japonica OX=39947 GN=TPP2 PE=2 SV=1 |
| AGT22_ARATH | Alanine--glyoxylate aminotransferase 2 homolog 2, mitochondrial OS=Arabidopsis thaliana OX=3702 GN=AGT3 PE=1 SV=2 |
| CHX5_ARATH | Cation/H(+) antiporter 5 OS=Arabidopsis thaliana OX=3702 GN=CHX5 PE=2 SV=1 |
| CISY2_ARATH | Citrate synthase 2, peroxisomal OS=Arabidopsis thaliana OX=3702 GN=CSY2 PE=2 SV=1 |
| G2OX6_ORYSJ | Gibberellin 2-beta-dioxygenase 6 OS=Oryza sativa subsp. japonica OX=39947 GN=GA2OX6 PE=1 SV=1 |
| MYO12_ARATH | Myosin-12 OS=Arabidopsis thaliana OX=3702 GN=XI-F PE=2 SV=1 |
| PAR1_ROSHC | Phenylacetaldehyde reductase OS=Rosa hybrid cultivar OX=128735 GN=PAR PE=1 SV=1 |
| GMPP2_ORYSJ | Probable mannose-1-phosphate guanylyltransferase 2 OS=Oryza sativa subsp. japonica OX=39947 GN=Os01g0847200 PE=2 SV=1 |
| AGO4A_ORYSJ | Protein argonaute 4A OS=Oryza sativa subsp. japonica OX=39947 GN=AGO4A PE=2 SV=1 |
| PHR_ARATH | Deoxyribodipyrimidine photo-lyase OS=Arabidopsis thaliana OX=3702 GN=PHR1 PE=2 SV=1 |
| RLM1B_ARATH | Disease resistance protein RML1B OS=Arabidopsis thaliana OX=3702 GN=RLM1B PE=2 SV=1 |
| HGD_ARATH | Homogentisate 1,2-dioxygenase OS=Arabidopsis thaliana OX=3702 GN=HGO PE=2 SV=2 |
| NACA_PINTA | Nascent polypeptide-associated complex subunit alpha-like protein OS=Pinus taeda OX=3352 PE=2 SV=1 |
| PER2_VITVI | Peroxidase 2 (Fragment) OS=Vitis vinifera OX=29760 PE=1 SV=1 |
| DHAR2_ORYSJ | Probable glutathione S-transferase DHAR2, chloroplastic OS=Oryza sativa subsp. japonica OX=39947 GN=DHAR2 PE=2 SV=1 |
| BSS_BOTBR | Squalene synthase BSS OS=Botryococcus braunii OX=38881 GN=BSS PE=1 SV=1 |
| UP12_PSEMZ | Unknown protein 12 (Fragment) OS=Pseudotsuga menziesii OX=3357 PE=1 SV=1 |
| C71Z8_MAIZE | Zealexin A1 synthase OS=Zea mays OX=4577 GN=CYP71Z18 PE=1 SV=1 |
| AGL86_ARATH | Agamous-like MADS-box protein AGL86 OS=Arabidopsis thaliana OX=3702 GN=AGL86 PE=1 SV=1 |
| INVB_DAUCA | Beta-fructofuranosidase, soluble isoenzyme I OS=Daucus carota OX=4039 GN=INV*DC4 PE=1 SV=2 |
| EIN2_ARATH | Ethylene-insensitive protein 2 OS=Arabidopsis thaliana OX=3702 GN=EIN2 PE=1 SV=1 |
| PLCD7_ARATH | Phosphoinositide phospholipase C 7 OS=Arabidopsis thaliana OX=3702 GN=PLC7 PE=1 SV=1 |
| RGA3_SOLBU | Putative disease resistance protein RGA3 OS=Solanum bulbocastanum OX=147425 GN=RGA3 PE=2 SV=2 |
| SCP29_ARATH | Serine carboxypeptidase-like 29 OS=Arabidopsis thaliana OX=3702 GN=SCPL29 PE=2 SV=1 |
| SFGH_ARATH | S-formylglutathione hydrolase OS=Arabidopsis thaliana OX=3702 GN=SFGH PE=1 SV=2 |
| TCPZA_ARATH | T-complex protein 1 subunit zeta 1 OS=Arabidopsis thaliana OX=3702 GN=CCT6A PE=1 SV=1 |
| ZIP4L_ARATH | TPR repeat-containing protein ZIP4 OS=Arabidopsis thaliana OX=3702 GN=ZIP4 PE=2 SV=1 |
| Y2766_ARATH | Uncharacterized protein At2g37660, chloroplastic OS=Arabidopsis thaliana OX=3702 GN=At2g37660 PE=1 SV=2 |
| PANB2_ARATH | 3-methyl-2-oxobutanoate hydroxymethyltransferase 2, mitochondrial OS=Arabidopsis thaliana OX=3702 GN=KPHMT2 PE=1 SV=1 |
| BBX24_ARATH | B-box zinc finger protein 24 OS=Arabidopsis thaliana OX=3702 GN=BBX24 PE=1 SV=1 |
| RBL_CERJA | Ribulose bisphosphate carboxylase large chain (Fragment) OS=Cercidiphyllum japonicum OX=13413 GN=rbcL PE=3 SV=1 |
| SCAM2_ORYSJ | Secretory carrier-associated membrane protein 2 OS=Oryza sativa subsp. japonica OX=39947 GN=SCAMP2 PE=2 SV=1 |
| GLYC5_ARATH | Serine hydroxymethyltransferase 5 OS=Arabidopsis thaliana OX=3702 GN=SHM5 PE=3 SV=1 |
| TRXY1_ARATH | Thioredoxin Y1, chloroplastic OS=Arabidopsis thaliana OX=3702 GN=At1g76760 PE=1 SV=1 |
| R15A1_ARATH | 40S ribosomal protein S15a-1 OS=Arabidopsis thaliana OX=3702 GN=RPS15AA PE=2 SV=2 |
| RH15_ARATH | DEAD-box ATP-dependent RNA helicase 15 OS=Arabidopsis thaliana OX=3702 GN=RH15 PE=1 SV=3 |
| CO410_WHEAT | Dehydrin COR410 OS=Triticum aestivum OX=4565 GN=COR410 PE=2 SV=1 |
| GEDH1_OCIBA | Geraniol dehydrogenase 1 OS=Ocimum basilicum OX=39350 GN=GEDH1 PE=1 SV=1 |
| MTS1_SELML | Microbial Terpene synthase-like protein 1 OS=Selaginella moellendorffii OX=88036 GN=SELMODRAFT_402353 PE=1 SV=2 |
| ODPA3_ORYSJ | Pyruvate dehydrogenase E1 component subunit alpha-3, chloroplastic OS=Oryza sativa subsp. japonica OX=39947 GN=Os04g0119400 PE=2 SV=2 |
| GBLPA_ARATH | Receptor for activated C kinase 1A OS=Arabidopsis thaliana OX=3702 GN=RACK1A PE=1 SV=2 |
| GUFP_OSTLU | Translation factor GUF1 homolog, chloroplastic OS=Ostreococcus lucimarinus (strain CCE9901) OX=436017 GN=OSTLU_15891 PE=3 SV=1 |
| PSMDA_ORYSJ | 26S proteasome non-ATPase regulatory subunit 4 homolog OS=Oryza sativa subsp. japonica OX=39947 GN=RPN10 PE=1 SV=1 |
| EF1D1_ARATH | Elongation factor 1-delta 1 OS=Arabidopsis thaliana OX=3702 GN=At1g30230 PE=1 SV=2 |
| GGT2_ARATH | Glutamate--glyoxylate aminotransferase 2 OS=Arabidopsis thaliana OX=3702 GN=GGAT2 PE=1 SV=1 |
| ROC6_ORYSJ | Homeobox-leucine zipper protein ROC6 OS=Oryza sativa subsp. japonica OX=39947 GN=ROC6 PE=2 SV=2 |
| HSOP_WHEAT | Hsp70-Hsp90 organizing protein OS=Triticum aestivum OX=4565 GN=HOP PE=1 SV=1 |
| MED14_ARATH | Mediator of RNA polymerase II transcription subunit 14 OS=Arabidopsis thaliana OX=3702 GN=MED14 PE=1 SV=1 |
| NIA_LOTJA | Nitrate reductase [NADH] OS=Lotus japonicus OX=34305 GN=NIA PE=3 SV=1 |
| UMPS_TOBAC | Uridine 5'-monophosphate synthase (Fragment) OS=Nicotiana tabacum OX=4097 GN=PYR5-6 PE=2 SV=1 |
| OPR3_SOLLC | 12-oxophytodienoate reductase 3 OS=Solanum lycopersicum OX=4081 GN=OPR3 PE=1 SV=1 |
| 4CL1_SOYBN | 4-coumarate--CoA ligase 1 (Fragment) OS=Glycine max OX=3847 PE=2 SV=1 |
| RL7A1_ARATH | 60S ribosomal protein L7a-1 OS=Arabidopsis thaliana OX=3702 GN=RPL7AA PE=2 SV=2 |
| AGT21_ARATH | Alanine--glyoxylate aminotransferase 2 homolog 1, mitochondrial OS=Arabidopsis thaliana OX=3702 GN=AGT2 PE=1 SV=1 |
| HKT15_ORYSI | Cation transporter HKT1;5 OS=Oryza sativa subsp. indica OX=39946 GN=HKT1;5 PE=2 SV=2 |
| HEM2_SPIOL | Delta-aminolevulinic acid dehydratase, chloroplastic OS=Spinacia oleracea OX=3562 GN=HEMB PE=1 SV=2 |
| DLD_ARATH | D-lactate dehydrogenase [cytochrome], mitochondrial OS=Arabidopsis thaliana OX=3702 GN=DLD PE=1 SV=1 |
| EF1D2_ARATH | Elongation factor 1-delta 2 OS=Arabidopsis thaliana OX=3702 GN=At2g18110 PE=1 SV=1 |
| GSTT2_ARATH | Glutathione S-transferase T2 OS=Arabidopsis thaliana OX=3702 GN=GSTT2 PE=2 SV=1 |
| Y1643_ARATH | G-type lectin S-receptor-like serine/threonine-protein kinase At1g61430 OS=Arabidopsis thaliana OX=3702 GN=At1g61430 PE=2 SV=2 |
| MAOM_SOLTU | NAD-dependent malic enzyme 62 kDa isoform, mitochondrial OS=Solanum tuberosum OX=4113 PE=1 SV=1 |
| NLTP_PRUAV | Non-specific lipid-transfer protein OS=Prunus avium OX=42229 PE=1 SV=1 |
| PPR88_ARATH | Pentatricopeptide repeat-containing protein At1g62260, mitochondrial OS=Arabidopsis thaliana OX=3702 GN=PCMP-E10 PE=2 SV=1 |
| TAT2_ARATH | Probable aminotransferase TAT2 OS=Arabidopsis thaliana OX=3702 GN=At5g53970 PE=2 SV=1 |
| ODPB3_ORYSJ | Pyruvate dehydrogenase E1 component subunit beta-3, chloroplastic OS=Oryza sativa subsp. japonica OX=39947 GN=Os12g0616900 PE=2 SV=1 |
| EDL18_ARATH | Sugar transporter ERD6-like 18 OS=Arabidopsis thaliana OX=3702 GN=SFP2 PE=2 SV=1 |
| VCR_ARATH | Varicose-related protein OS=Arabidopsis thaliana OX=3702 GN=VCR PE=2 SV=1 |
| RS102_ARATH | 40S ribosomal protein S10-2 OS=Arabidopsis thaliana OX=3702 GN=RPS10B PE=2 SV=1 |
| FKB70_WHEAT | 70 kDa peptidyl-prolyl isomerase OS=Triticum aestivum OX=4565 GN=FKBP70 PE=1 SV=1 |
| ADHX_ORYSI | Alcohol dehydrogenase class-3 OS=Oryza sativa subsp. indica OX=39946 GN=ADHIII PE=3 SV=1 |
| ARFK_ARATH | Auxin response factor 11 OS=Arabidopsis thaliana OX=3702 GN=ARF11 PE=2 SV=3 |
| PME4_ARATH | Pectinesterase 4 OS=Arabidopsis thaliana OX=3702 GN=PME4 PE=2 SV=1 |
| PPR13_ARATH | Pentatricopeptide repeat-containing protein At1g05750, chloroplastic OS=Arabidopsis thaliana OX=3702 GN=PDE247 PE=2 SV=1 |
| GIGAN_ORYSJ | Protein GIGANTEA OS=Oryza sativa subsp. japonica OX=39947 GN=GI PE=2 SV=2 |
| PPR42_ARATH | Putative pentatricopeptide repeat-containing protein At1g13800 OS=Arabidopsis thaliana OX=3702 GN=At1g13800 PE=3 SV=1 |
| SPZ4_HORVU | Serpin-Z4 OS=Hordeum vulgare OX=4513 GN=PAZ1 PE=1 SV=2 |
| SODC1_SOLLC | Superoxide dismutase [Cu-Zn] 1 OS=Solanum lycopersicum OX=4081 GN=SODCC.1 PE=2 SV=2 |
| TCPH_ARATH | T-complex protein 1 subunit eta OS=Arabidopsis thaliana OX=3702 GN=CCT7 PE=1 SV=1 |
| SYWM_ARATH | Tryptophan--tRNA ligase, chloroplastic/mitochondrial OS=Arabidopsis thaliana OX=3702 GN=OVA4 PE=1 SV=1 |
| DPNP_ORYSA | 3'(2'),5'-bisphosphate nucleotidase OS=Oryza sativa OX=4530 PE=2 SV=1 |
| ACR12_ARATH | ACT domain-containing protein ACR12 OS=Arabidopsis thaliana OX=3702 GN=ACR12 PE=2 SV=1 |
| RH27_ARATH | DEAD-box ATP-dependent RNA helicase 27 OS=Arabidopsis thaliana OX=3702 GN=RH27 PE=2 SV=2 |
| FB250_ARATH | F-box protein At5g03100 OS=Arabidopsis thaliana OX=3702 GN=At5g03100 PE=2 SV=1 |
| PPR77_ARATH | Pentatricopeptide repeat-containing protein At1g52620 OS=Arabidopsis thaliana OX=3702 GN=At1g52620 PE=2 SV=1 |
| CYP23_ARATH | Peptidyl-prolyl cis-trans isomerase CYP23 OS=Arabidopsis thaliana OX=3702 GN=CYP23 PE=2 SV=1 |
| HEM3_ORYSJ | Porphobilinogen deaminase, chloroplastic OS=Oryza sativa subsp. japonica OX=39947 GN=HEMC PE=2 SV=1 |
| YCF2B_CRUWA | Protein Ycf2 B OS=Crucihimalaya wallichii OX=78192 GN=ycf2-B PE=3 SV=1 |
| RIDA_ARATH | Reactive Intermediate Deaminase A, chloroplastic OS=Arabidopsis thaliana OX=3702 GN=RIDA PE=1 SV=1 |
| UXS6_ARATH | UDP-glucuronic acid decarboxylase 6 OS=Arabidopsis thaliana OX=3702 GN=UXS6 PE=2 SV=1 |
| RL262_ARATH | 60S ribosomal protein L26-2 OS=Arabidopsis thaliana OX=3702 GN=RPL26B PE=2 SV=1 |
| PURA1_SORBI | Adenylosuccinate synthetase 1, chloroplastic OS=Sorghum bicolor OX=4558 GN=PURA1 PE=3 SV=1 |
| SYNC1_ARATH | Asparagine--tRNA ligase, cytoplasmic 1 OS=Arabidopsis thaliana OX=3702 GN=SYNC1 PE=1 SV=1 |
| COPG2_ORYSJ | Coatomer subunit gamma-2 OS=Oryza sativa subsp. japonica OX=39947 GN=Os07g0201100 PE=2 SV=1 |
| CNIF1_ARATH | Cysteine desulfurase 1, chloroplastic OS=Arabidopsis thaliana OX=3702 GN=NFS2 PE=1 SV=1 |
| STKLO_ARATH | GLABROUS1 enhancer-binding protein OS=Arabidopsis thaliana OX=3702 GN=GEBP PE=1 SV=1 |
| SYHM_ARATH | Histidine--tRNA ligase, chloroplastic/mitochondrial OS=Arabidopsis thaliana OX=3702 GN=At3g46100 PE=2 SV=1 |
| LYK4_ARATH | LysM domain receptor-like kinase 4 OS=Arabidopsis thaliana OX=3702 GN=LYK4 PE=1 SV=1 |
| MTNA_TOBAC | Methylthioribose-1-phosphate isomerase OS=Nicotiana tabacum OX=4097 GN=CIG2 PE=2 SV=1 |
| BXL7_ARATH | Probable beta-D-xylosidase 7 OS=Arabidopsis thaliana OX=3702 GN=BXL7 PE=2 SV=2 |
| RIBA1_ORYSJ | Probable bifunctional riboflavin biosynthesis protein RIBA 1, chloroplastic OS=Oryza sativa subsp. japonica OX=39947 GN=RIBA1 PE=2 SV=1 |
| MB3R2_ORYSJ | Transcription factor MYB3R-2 OS=Oryza sativa subsp. japonica OX=39947 GN=MYB3R-2 PE=2 SV=1 |
| VPEB_ARATH | Vacuolar-processing enzyme beta-isozyme OS=Arabidopsis thaliana OX=3702 GN=bVPE PE=1 SV=3 |
| UGHY_ARATH | (S)-ureidoglycine aminohydrolase OS=Arabidopsis thaliana OX=3702 GN=UGLYAH PE=1 SV=1 |
| HIBC6_ARATH | 3-hydroxyisobutyryl-CoA hydrolase-like protein 3, mitochondrial OS=Arabidopsis thaliana OX=3702 GN=At4g13360 PE=1 SV=2 |
| RS25_SOLLC | 40S ribosomal protein S25 OS=Solanum lycopersicum OX=4081 GN=RPS25 PE=3 SV=1 |
| BIG3_ARATH | Brefeldin A-inhibited guanine nucleotide-exchange protein 3 OS=Arabidopsis thaliana OX=3702 GN=BIG3 PE=1 SV=1 |
| CRK38_ARATH | Cysteine-rich receptor-like protein kinase 38 OS=Arabidopsis thaliana OX=3702 GN=CRK38 PE=3 SV=1 |
| C81F3_ARATH | Cytochrome P450 81F3 OS=Arabidopsis thaliana OX=3702 GN=CYP81F3 PE=2 SV=1 |
| FBL16_ARATH | F-box/LRR-repeat protein 16 OS=Arabidopsis thaliana OX=3702 GN=FBL16 PE=2 SV=1 |
| SYIC_ARATH | Isoleucine--tRNA ligase, cytoplasmic OS=Arabidopsis thaliana OX=3702 GN=At4g10320 PE=2 SV=1 |
| LRX6_ARATH | Leucine-rich repeat extensin-like protein 6 OS=Arabidopsis thaliana OX=3702 GN=LRX6 PE=2 SV=1 |
| AXL1_ARATH | NEDD8-activating enzyme E1 regulatory subunit AXL OS=Arabidopsis thaliana OX=3702 GN=AXL1 PE=1 SV=1 |
| 2AB2D_ARATH | Probable serine/threonine protein phosphatase 2A regulatory subunit B''delta OS=Arabidopsis thaliana OX=3702 GN=B''DELTA PE=3 SV=1 |
| AKRCB_ARATH | Aldo-keto reductase family 4 member C11 OS=Arabidopsis thaliana OX=3702 GN=AKR4C11 PE=1 SV=1 |
| Y5809_ARATH | B3 domain-containing protein At5g18090 OS=Arabidopsis thaliana OX=3702 GN=At5g18090 PE=2 SV=1 |
| FBK29_ARATH | F-box/kelch-repeat protein At1g74510 OS=Arabidopsis thaliana OX=3702 GN=At1g74510 PE=2 SV=1 |
| LEC_LATSP | Lectin OS=Lathyrus sphaericus OX=3861 PE=1 SV=1 |
| 6DCS_SOYBN | NAD(P)H-dependent 6'-deoxychalcone synthase OS=Glycine max OX=3847 PE=1 SV=1 |
| P2C25_ARATH | Probable protein phosphatase 2C 25 OS=Arabidopsis thaliana OX=3702 GN=At2g30020 PE=1 SV=1 |
| U496E_ORYSJ | Putative UPF0496 protein 5 OS=Oryza sativa subsp. japonica OX=39947 GN=Os10g0359200 PE=3 SV=2 |
| SCP27_ARATH | Serine carboxypeptidase-like 27 OS=Arabidopsis thaliana OX=3702 GN=SCPL27 PE=2 SV=1 |
| SMC21_ARATH | Structural maintenance of chromosomes protein 2-1 OS=Arabidopsis thaliana OX=3702 GN=SMC2-1 PE=2 SV=2 |
| DCUP1_ARATH | Uroporphyrinogen decarboxylase 1, chloroplastic OS=Arabidopsis thaliana OX=3702 GN=HEME1 PE=2 SV=2 |
| RS91_ARATH | 40S ribosomal protein S9-1 OS=Arabidopsis thaliana OX=3702 GN=RPS9B PE=1 SV=1 |
| RL35_EUPES | 60S ribosomal protein L35 OS=Euphorbia esula OX=3993 GN=RPL35 PE=2 SV=1 |
| CINV2_ARATH | Alkaline/neutral invertase CINV2 OS=Arabidopsis thaliana OX=3702 GN=CINV2 PE=1 SV=1 |
| RPOC2_MARPO | DNA-directed RNA polymerase subunit beta'' OS=Marchantia polymorpha OX=3197 GN=rpoC2 PE=3 SV=1 |
| SCRK2_MAIZE | Fructokinase-2 OS=Zea mays OX=4577 GN=FRK2 PE=1 SV=1 |
| NADB_ARATH | L-aspartate oxidase, chloroplastic OS=Arabidopsis thaliana OX=3702 GN=AO PE=1 SV=1 |
| NAC3_ARATH | NAC domain-containing protein 3 OS=Arabidopsis thaliana OX=3702 GN=NAC003 PE=2 SV=1 |
| FYPP3_ARATH | Phytochrome-associated serine/threonine-protein phosphatase 3 OS=Arabidopsis thaliana OX=3702 GN=FYPP3 PE=1 SV=1 |
| ABI5_ARATH | Protein ABSCISIC ACID-INSENSITIVE 5 OS=Arabidopsis thaliana OX=3702 GN=ABI5 PE=1 SV=1 |
| TI214_ARATH | Protein TIC 214 OS=Arabidopsis thaliana OX=3702 GN=TIC214 PE=1 SV=1 |
| MST6_ORYSJ | Sugar transport protein MST6 OS=Oryza sativa subsp. japonica OX=39947 GN=MST6 PE=1 SV=1 |
| PS12B_ARATH | 26S proteasome non-ATPase regulatory subunit 12 homolog B OS=Arabidopsis thaliana OX=3702 GN=RPN5B PE=1 SV=1 |
| RR4_EQUGI | 30S ribosomal protein S4, chloroplastic OS=Equisetum giganteum OX=3259 GN=rps4 PE=3 SV=1 |
| RL341_ARATH | 60S ribosomal protein L34-1 OS=Arabidopsis thaliana OX=3702 GN=RPL34A PE=2 SV=1 |
| AB51G_ORYSJ | ABC transporter G family member 51 OS=Oryza sativa subsp. japonica OX=39947 GN=ABCG51 PE=3 SV=1 |
| ACR10_ARATH | ACT domain-containing protein ACR10 OS=Arabidopsis thaliana OX=3702 GN=ACR10 PE=2 SV=1 |
| APM1_ARATH | Aminopeptidase M1 OS=Arabidopsis thaliana OX=3702 GN=APM1 PE=1 SV=1 |
| ALD1_ORYSJ | Aminotransferase ALD1 homolog OS=Oryza sativa subsp. japonica OX=39947 GN=ALD1 PE=2 SV=1 |
| CKB11_ORYSJ | Cyclin-dependent kinase B1-1 OS=Oryza sativa subsp. japonica OX=39947 GN=CDKB1-1 PE=2 SV=1 |
| CYTI_VIGUN | Cysteine proteinase inhibitor OS=Vigna unguiculata OX=3917 PE=1 SV=1 |
| MASY_MAIZE | Malate synthase, glyoxysomal OS=Zea mays OX=4577 GN=LIP PE=2 SV=1 |
| PP424_ARATH | Pentatricopeptide repeat-containing protein At5g48730, chloroplastic OS=Arabidopsis thaliana OX=3702 GN=At5g48730 PE=2 SV=2 |
| P2C73_ARATH | Probable protein phosphatase 2C 73 OS=Arabidopsis thaliana OX=3702 GN=PPC6-7 PE=2 SV=1 |
| TONS_ARATH | Protein TONSOKU OS=Arabidopsis thaliana OX=3702 GN=TSK PE=1 SV=2 |
| DF252_ARATH | Putative defensin-like protein 252 OS=Arabidopsis thaliana OX=3702 GN=SCRL13 PE=3 SV=1 |
| PME10_ARATH | Putative pectinesterase 10 OS=Arabidopsis thaliana OX=3702 GN=PME10 PE=2 SV=1 |
| RAB7_VIGAC | Ras-related protein Rab7 OS=Vigna aconitifolia OX=3918 PE=2 SV=1 |
| PP2A3_ORYSI | Serine/threonine-protein phosphatase PP2A-3 catalytic subunit OS=Oryza sativa subsp. indica OX=39946 GN=PP2A3 PE=2 SV=2 |
| VATD_ARATH | V-type proton ATPase subunit D OS=Arabidopsis thaliana OX=3702 GN=VHA-D PE=1 SV=2 |
| RL18A_CASSA | 60S ribosomal protein L18a OS=Castanea sativa OX=21020 GN=RPL18A PE=2 SV=1 |
| RM02_MARPO | 60S ribosomal protein L2, mitochondrial OS=Marchantia polymorpha OX=3197 GN=RPL2 PE=3 SV=2 |
| CHIA_ARATH | Acidic endochitinase OS=Arabidopsis thaliana OX=3702 GN=CHIB1 PE=2 SV=2 |
| PYRB3_PEA | Aspartate carbamoyltransferase 3, chloroplastic OS=Pisum sativum OX=3888 GN=PYRB3 PE=2 SV=1 |
| AMYB_MAIZE | Beta-amylase OS=Zea mays OX=4577 GN=BMY1 PE=2 SV=1 |
| BGAL5_ORYSJ | Beta-galactosidase 5 OS=Oryza sativa subsp. japonica OX=39947 GN=Os03g0165400 PE=2 SV=1 |
| BGAL6_ORYSJ | Beta-galactosidase 6 OS=Oryza sativa subsp. japonica OX=39947 GN=Os03g0255100 PE=1 SV=2 |
| RH25_ARATH | DEAD-box ATP-dependent RNA helicase 25 OS=Arabidopsis thaliana OX=3702 GN=RH25 PE=2 SV=2 |
| E137_ARATH | Glucan endo-1,3-beta-glucosidase 7 OS=Arabidopsis thaliana OX=3702 GN=At4g34480 PE=1 SV=2 |
| BTF3L_ARATH | Nascent polypeptide-associated complex subunit beta OS=Arabidopsis thaliana OX=3702 GN=At1g73230 PE=2 SV=1 |
| PGLR_VITVI | Probable polygalacturonase OS=Vitis vinifera OX=29760 GN=GSVIVT00026920001 PE=1 SV=1 |
| LNG2_ARATH | Protein LONGIFOLIA 2 OS=Arabidopsis thaliana OX=3702 GN=LNG2 PE=1 SV=1 |
| P2C22_ORYSJ | Putative protein phosphatase 2C 22 OS=Oryza sativa subsp. japonica OX=39947 GN=Os02g0607500 PE=3 SV=2 |
| MA654_ARATH | 65-kDa microtubule-associated protein 4 OS=Arabidopsis thaliana OX=3702 GN=MAP65-4 PE=1 SV=2 |
| ASE3_ARATH | Amidophosphoribosyltransferase 3, chloroplastic OS=Arabidopsis thaliana OX=3702 GN=ASE3 PE=1 SV=1 |
| RIP2_PHYAM | Antiviral protein II/III OS=Phytolacca americana OX=3527 GN=PAP2 PE=1 SV=1 |
| BRM_ARATH | ATP-dependent helicase BRM OS=Arabidopsis thaliana OX=3702 GN=BRM PE=1 SV=1 |
| COI1B_ORYSJ | Coronatine-insensitive protein homolog 1b OS=Oryza sativa subsp. japonica OX=39947 GN=COI1B PE=1 SV=1 |
| DB3S_DIOPO | Dioscorin DB3S OS=Dioscorea polystachya OX=55575 GN=DB3S PE=1 SV=1 |
| NO552_SOYBN | Early nodulin-55-2 OS=Glycine max OX=3847 GN=ENOD55-2 PE=2 SV=1 |
| PER1_VITRO | Peroxidase 1 (Fragments) OS=Vitis rotundifolia OX=103349 PE=1 SV=1 |
| PARP1_ARATH | Poly [ADP-ribose] polymerase 1 OS=Arabidopsis thaliana OX=3702 GN=PARP1 PE=1 SV=2 |
| CML7_ORYSJ | Probable calcium-binding protein CML7 OS=Oryza sativa subsp. japonica OX=39947 GN=CML7 PE=2 SV=1 |
| Y5524_ARATH | Probable LRR receptor-like serine/threonine-protein kinase At5g65240 OS=Arabidopsis thaliana OX=3702 GN=At5g65240 PE=2 SV=1 |
| MAN9_ORYSJ | Putative mannan endo-1,4-beta-mannosidase 9 OS=Oryza sativa subsp. japonica OX=39947 GN=MAN9 PE=2 SV=2 |
| PDC1_ORYSI | Pyruvate decarboxylase 1 OS=Oryza sativa subsp. indica OX=39946 GN=PDC1 PE=2 SV=1 |
| RFA1C_ARATH | Replication protein A 70 kDa DNA-binding subunit C OS=Arabidopsis thaliana OX=3702 GN=RPA1C PE=3 SV=1 |
| SAC3B_ARATH | SAC3 family protein B OS=Arabidopsis thaliana OX=3702 GN=SAC3B PE=1 SV=1 |
| PP2A4_ORYSJ | Serine/threonine-protein phosphatase PP2A-4 catalytic subunit OS=Oryza sativa subsp. japonica OX=39947 GN=PP2A4 PE=2 SV=2 |
| S40A3_ARATH | Solute carrier family 40 member 3, chloroplastic OS=Arabidopsis thaliana OX=3702 GN=IREG3 PE=1 SV=1 |
| SODF_NICPL | Superoxide dismutase [Fe], chloroplastic (Fragment) OS=Nicotiana plumbaginifolia OX=4092 GN=SODB PE=2 SV=1 |
| E2FA_ARATH | Transcription factor E2FA OS=Arabidopsis thaliana OX=3702 GN=E2FA PE=1 SV=1 |
| TAR1_ORYSJ | Tryptophan aminotransferase-related protein 1 OS=Oryza sativa subsp. japonica OX=39947 GN=TAR1 PE=2 SV=1 |
| RHVI2_ROSHC | Acid beta-fructofuranosidase 2, vacuolar OS=Rosa hybrid cultivar OX=128735 PE=2 SV=1 |
| PURA_SOLBU | Adenylosuccinate synthetase, chloroplastic OS=Solanum bulbocastanum OX=147425 GN=PURA PE=3 SV=1 |
| AGL30_ARATH | Agamous-like MADS-box protein AGL30 OS=Arabidopsis thaliana OX=3702 GN=AGL30 PE=1 SV=1 |
| ISS1_ARATH | Aromatic aminotransferase ISS1 OS=Arabidopsis thaliana OX=3702 GN=ISS1 PE=1 SV=1 |
| PFKA_WHEAT | ATP-dependent 6-phosphofructokinase (Fragment) OS=Triticum aestivum OX=4565 GN=PFK PE=2 SV=1 |
| BBE11_ARATH | Berberine bridge enzyme-like 11 OS=Arabidopsis thaliana OX=3702 GN=At1g30730 PE=2 SV=1 |
| BBE13_ARATH | Berberine bridge enzyme-like 13 OS=Arabidopsis thaliana OX=3702 GN=At1g30760 PE=1 SV=1 |
| EF100_ARATH | Ethylene-responsive transcription factor 1A OS=Arabidopsis thaliana OX=3702 GN=ERF1A PE=1 SV=2 |
| FPA_ARATH | Flowering time control protein FPA OS=Arabidopsis thaliana OX=3702 GN=FPA PE=1 SV=2 |
| GLSN_MEDSA | Glutamate synthase [NADH], amyloplastic OS=Medicago sativa OX=3879 PE=1 SV=1 |
| SYEC_ARATH | Glutamate--tRNA ligase, cytoplasmic OS=Arabidopsis thaliana OX=3702 GN=At5g26710 PE=1 SV=1 |
| ARAK_ARATH | L-arabinokinase OS=Arabidopsis thaliana OX=3702 GN=ARA1 PE=1 SV=1 |
| NPC2_ARATH | Non-specific phospholipase C2 OS=Arabidopsis thaliana OX=3702 GN=NPC2 PE=2 SV=1 |
| NUDT3_ARATH | Nudix hydrolase 3 OS=Arabidopsis thaliana OX=3702 GN=NUDT3 PE=1 SV=1 |
| PP307_ARATH | Pentatricopeptide repeat-containing protein At4g13650 OS=Arabidopsis thaliana OX=3702 GN=PCMP-H42 PE=2 SV=2 |
| PP334_ARATH | Pentatricopeptide repeat-containing protein At4g21705, mitochondrial OS=Arabidopsis thaliana OX=3702 GN=At4g21705 PE=2 SV=1 |
| PAO1_ARATH | Polyamine oxidase 1 OS=Arabidopsis thaliana OX=3702 GN=PAO1 PE=1 SV=1 |
| MTBC1_VITVI | Probable bifunctional methylthioribulose-1-phosphate dehydratase/enolase-phosphatase E1 1 OS=Vitis vinifera OX=29760 GN=VIT_19s0014g02480 PE=3 SV=2 |
| YSL4_ORYSJ | Probable metal-nicotianamine transporter YSL4 OS=Oryza sativa subsp. japonica OX=39947 GN=YSL4 PE=2 SV=1 |
| PATH1_ARATH | Protein PAT1 homolog 1 OS=Arabidopsis thaliana OX=3702 GN=PAT1H1 PE=1 SV=1 |
| THOC2_ARATH | THO complex subunit 2 OS=Arabidopsis thaliana OX=3702 GN=THO2 PE=1 SV=1 |
| URM1_ORYSI | Ubiquitin-related modifier 1 homolog OS=Oryza sativa subsp. indica OX=39946 GN=URM1 PE=3 SV=1 |
| MENB_ARATH | 1,4-dihydroxy-2-naphthoyl-CoA synthase, peroxisomal OS=Arabidopsis thaliana OX=3702 GN=MENB PE=1 SV=2 |
| BGL17_ARATH | Beta-glucosidase 17 OS=Arabidopsis thaliana OX=3702 GN=BGLU17 PE=2 SV=1 |
| OMT1_SECCE | Daphnetin O-methyltransferase 1 OS=Secale cereale OX=4550 GN=OMT1 PE=1 SV=1 |
| DRM1L_ARATH | DNA (cytosine-5)-methyltransferase DRM1 OS=Arabidopsis thaliana OX=3702 GN=DRM1 PE=3 SV=2 |
| DIS1_ORYSJ | E3 ubiquitin-protein ligase DIS1 OS=Oryza sativa subsp. japonica OX=39947 GN=DIS1 PE=1 SV=1 |
| EHD1_ARATH | EH domain-containing protein 1 OS=Arabidopsis thaliana OX=3702 GN=EHD1 PE=1 SV=1 |
| FH4_ARATH | Formin-like protein 4 OS=Arabidopsis thaliana OX=3702 GN=FH4 PE=1 SV=2 |
| GSH1_MEDTR | Glutamate--cysteine ligase, chloroplastic OS=Medicago truncatula OX=3880 GN=GSH1 PE=2 SV=1 |
| GSHB_SOLLC | Glutathione synthetase, chloroplastic OS=Solanum lycopersicum OX=4081 GN=GSH2 PE=2 SV=1 |
| ASPR_HORVU | Phytepsin OS=Hordeum vulgare OX=4513 PE=1 SV=1 |
| PME47_ARATH | Probable pectinesterase/pectinesterase inhibitor 47 OS=Arabidopsis thaliana OX=3702 GN=PME47 PE=2 SV=1 |
| Y4103_ARATH | Probable receptor-like protein kinase At4g10390 OS=Arabidopsis thaliana OX=3702 GN=At4g10390 PE=2 SV=1 |
| RBOHI_ARATH | Probable respiratory burst oxidase homolog protein I OS=Arabidopsis thaliana OX=3702 GN=RBOHI PE=3 SV=2 |
| WNK5_ORYSJ | Probable serine/threonine-protein kinase WNK5 OS=Oryza sativa subsp. japonica OX=39947 GN=WNK5 PE=2 SV=1 |
| KIP_ARATH | Protein KINKY POLLEN OS=Arabidopsis thaliana OX=3702 GN=KIP PE=2 SV=1 |
| PUM24_ARATH | Pumilio homolog 24 OS=Arabidopsis thaliana OX=3702 GN=APUM24 PE=1 SV=1 |
| ROGFD_ARATH | Rop guanine nucleotide exchange factor 13 OS=Arabidopsis thaliana OX=3702 GN=ROPGEF13 PE=1 SV=1 |
| UNCL_ARATH | Serine/threonine-protein kinase UCNL OS=Arabidopsis thaliana OX=3702 GN=UCNL PE=2 SV=1 |
| TPS3_XANST | Sesquiterpene synthase TPS3 OS=Xanthium strumarium OX=318068 GN=TPS3 PE=1 SV=1 |
| KING1_ARATH | SNF1-related protein kinase regulatory subunit gamma-1 OS=Arabidopsis thaliana OX=3702 GN=KING1 PE=1 SV=2 |
| NAC42_ARATH | Transcription factor JUNGBRUNNEN 1 OS=Arabidopsis thaliana OX=3702 GN=JUB1 PE=1 SV=1 |
| UBE13_WHEAT | Ubiquitin-activating enzyme E1 3 OS=Triticum aestivum OX=4565 GN=UBA3 PE=1 SV=1 |
| WOX14_ARATH | WUSCHEL-related homeobox 14 OS=Arabidopsis thaliana OX=3702 GN=WOX14 PE=1 SV=1 |
| HMDH1_SOLTU | 3-hydroxy-3-methylglutaryl-coenzyme A reductase 1 OS=Solanum tuberosum OX=4113 GN=HMG1 PE=2 SV=1 |
| DBNBT_TAXCA | 3'-N-debenzoyl-2'-deoxytaxol N-benzoyltransferase OS=Taxus canadensis OX=88032 GN=TAX10 PE=1 SV=1 |
| DAPA_COILA | 4-hydroxy-tetrahydrodipicolinate synthase, chloroplastic OS=Coix lacryma-jobi OX=4505 GN=DAPA PE=3 SV=1 |
| 6PGL3_ARATH | 6-phosphogluconolactonase 3, chloroplastic OS=Arabidopsis thaliana OX=3702 GN=PGL3 PE=1 SV=1 |
| ACCD_HELSJ | Acetyl-coenzyme A carboxylase carboxyl transferase subunit beta OS=Helicosporidium sp. subsp. Simulium jonesii OX=145475 GN=accD PE=3 SV=1 |
| CLPAA_SOLLC | ATP-dependent Clp protease ATP-binding subunit ClpA homolog CD4A, chloroplastic OS=Solanum lycopersicum OX=4081 GN=CD4A PE=3 SV=1 |
| Y3205_ORYSJ | B3 domain-containing protein Os03g0620500 OS=Oryza sativa subsp. japonica OX=39947 GN=Os03g0620500 PE=2 SV=1 |
| BZP10_ARATH | Basic leucine zipper 10 OS=Arabidopsis thaliana OX=3702 GN=BZIP10 PE=1 SV=2 |
| BGAL8_ARATH | Beta-galactosidase 8 OS=Arabidopsis thaliana OX=3702 GN=BGAL8 PE=2 SV=2 |
| CGL_ARATH | Bifunctional cystathionine gamma-lyase/cysteine synthase OS=Arabidopsis thaliana OX=3702 GN=DES1 PE=1 SV=1 |
| EME1B_ARATH | Crossover junction endonuclease EME1B OS=Arabidopsis thaliana OX=3702 GN=EME1B PE=1 SV=1 |
| CAF2M_ORYSJ | CRS2-associated factor 2, mitochondrial OS=Oryza sativa subsp. japonica OX=39947 GN=Os08g0188000 PE=2 SV=2 |
| CYSP4_BRANA | Cysteine proteinase COT44 (Fragment) OS=Brassica napus OX=3708 PE=2 SV=1 |
| PIK2_ORYSJ | Disease resistance protein Pik-2 OS=Oryza sativa subsp. japonica OX=39947 GN=PIK-2 PE=3 SV=1 |
| SIZ1_ORYSJ | E3 SUMO-protein ligase SIZ1 OS=Oryza sativa subsp. japonica OX=39947 GN=SIZ1 PE=1 SV=1 |
| FIPS3_ARATH | FIP1[III]-like protein OS=Arabidopsis thaliana OX=3702 GN=FIPS3 PE=1 SV=1 |
| HIP32_ARATH | Heavy metal-associated isoprenylated plant protein 32 OS=Arabidopsis thaliana OX=3702 GN=HIPP32 PE=2 SV=1 |
| GLO2N_ARATH | Hydroxyacylglutathione hydrolase 2, mitochondrial OS=Arabidopsis thaliana OX=3702 GN=At2g31350 PE=1 SV=1 |
| MATK_ALPCA | Maturase K OS=Alpinia calcarata OX=199618 GN=matK PE=3 SV=1 |
| NCPR2_ARTAN | NADPH--cytochrome P450 reductase 2 OS=Artemisia annua OX=35608 GN=CPR2 PE=3 SV=1 |
| OFT24_ARATH | O-fucosyltransferase 24 OS=Arabidopsis thaliana OX=3702 GN=OFUT24 PE=2 SV=1 |
| TPMT2_ARATH | Phosphatidylglycerophosphate phosphatase PTPMT2 OS=Arabidopsis thaliana OX=3702 GN=PTPMT2 PE=1 SV=1 |
| RHY1A_ARATH | Probable E3 ubiquitin-protein ligase RHY1A OS=Arabidopsis thaliana OX=3702 GN=RHY1A PE=1 SV=1 |
| DHAR1_ORYSJ | Probable glutathione S-transferase DHAR1, cytosolic OS=Oryza sativa subsp. japonica OX=39947 GN=DHAR1 PE=1 SV=1 |
| GPX4_GOSHI | Probable phospholipid hydroperoxide glutathione peroxidase OS=Gossypium hirsutum OX=3635 PE=2 SV=1 |
| PBL1_ARATH | Probable serine/threonine-protein kinase PBL1 OS=Arabidopsis thaliana OX=3702 GN=PBL1 PE=1 SV=1 |
| WRK41_ARATH | Probable WRKY transcription factor 41 OS=Arabidopsis thaliana OX=3702 GN=WRKY41 PE=1 SV=2 |
| HIRA_MAIZE | Protein HIRA OS=Zea mays OX=4577 PE=1 SV=1 |
| RT03_PETHY | Ribosomal protein S3, mitochondrial OS=Petunia hybrida OX=4102 GN=YRPS3 PE=2 SV=1 |
| PP12_ARATH | Serine/threonine-protein phosphatase PP1 isozyme 2 OS=Arabidopsis thaliana OX=3702 GN=TOPP2 PE=1 SV=1 |
| SYP71_ARATH | Syntaxin-71 OS=Arabidopsis thaliana OX=3702 GN=SYP71 PE=1 SV=1 |
| C3H1_ORYSJ | Zinc finger CCCH domain-containing protein 1 OS=Oryza sativa subsp. japonica OX=39947 GN=Os01g0174600 PE=2 SV=1 |
| REHYA_ORYSI | 1-Cys peroxiredoxin A OS=Oryza sativa subsp. indica OX=39946 GN=OsI_27030 PE=2 SV=1 |
| RR18_JASNU | 30S ribosomal protein S18, chloroplastic OS=Jasminum nudiflorum OX=126431 GN=rps18 PE=3 SV=1 |
| RS7_AVIMR | 40S ribosomal protein S7 OS=Avicennia marina OX=82927 GN=RPS7 PE=2 SV=1 |
| AB50G_ORYSJ | ABC transporter G family member 50 OS=Oryza sativa subsp. japonica OX=39947 GN=ABCG50 PE=2 SV=2 |
| MTND2_ORYSI | Acireductone dioxygenase 2 OS=Oryza sativa subsp. indica OX=39946 GN=ARD2 PE=2 SV=2 |
| AP3_VITVI | Agamous-like MADS-box protein AP3 OS=Vitis vinifera OX=29760 GN=AP3 PE=2 SV=1 |
| APS4_ARATH | ATP sulfurylase 4, chloroplastic OS=Arabidopsis thaliana OX=3702 GN=APS4 PE=1 SV=1 |
| BGAL2_ORYSJ | Beta-galactosidase 2 OS=Oryza sativa subsp. japonica OX=39947 GN=Os01g0580200 PE=2 SV=1 |
| BGAL9_ARATH | Beta-galactosidase 9 OS=Arabidopsis thaliana OX=3702 GN=BGAL9 PE=2 SV=1 |
| FBW4_ARATH | F-box/WD-40 repeat-containing protein At3g52030 OS=Arabidopsis thaliana OX=3702 GN=At3g52030 PE=4 SV=2 |
| GLGS_SOLTU | Glucose-1-phosphate adenylyltransferase small subunit, chloroplastic/amyloplastic OS=Solanum tuberosum OX=4113 PE=1 SV=2 |
| GDPD6_ARATH | Glycerophosphodiester phosphodiesterase GDPD6 OS=Arabidopsis thaliana OX=3702 GN=GDPD6 PE=2 SV=1 |
| GOGC5_ARATH | Golgin candidate 5 OS=Arabidopsis thaliana OX=3702 GN=GC5 PE=1 SV=1 |
| HIS8_ARATH | Histidinol dehydrogenase, chloroplastic OS=Arabidopsis thaliana OX=3702 GN=HISN8 PE=2 SV=1 |
| GRXS2_ORYSJ | Monothiol glutaredoxin-S2 OS=Oryza sativa subsp. japonica OX=39947 GN=GRXS2 PE=2 SV=1 |
| PP313_ARATH | Pentatricopeptide repeat-containing protein At4g15720 OS=Arabidopsis thaliana OX=3702 GN=PCMP-H1 PE=2 SV=1 |
| PP315_ARATH | Pentatricopeptide repeat-containing protein At4g16470 OS=Arabidopsis thaliana OX=3702 GN=PCMP-E12 PE=2 SV=2 |
| PSY3_MAIZE | Phytoene synthase 3, chloroplastic OS=Zea mays OX=4577 GN=PSY3 PE=1 SV=1 |
| PDR1_NICPL | Pleiotropic drug resistance protein 1 OS=Nicotiana plumbaginifolia OX=4092 GN=PDR1 PE=1 SV=1 |
| CESA1_ORYSI | Probable cellulose synthase A catalytic subunit 1 [UDP-forming] OS=Oryza sativa subsp. indica OX=39946 GN=CESA1 PE=3 SV=1 |
| PAP5_ARATH | Probable plastid-lipid-associated protein 5, chloroplastic OS=Arabidopsis thaliana OX=3702 GN=PAP5 PE=2 SV=1 |
| IDD5_ARATH | Protein indeterminate-domain 5, chloroplastic OS=Arabidopsis thaliana OX=3702 GN=IDD5 PE=1 SV=1 |
| IQD24_ARATH | Protein IQ-DOMAIN 24 OS=Arabidopsis thaliana OX=3702 GN=IQD24 PE=1 SV=1 |
| ZPR1_ARATH | Protein LITTLE ZIPPER 1 OS=Arabidopsis thaliana OX=3702 GN=ZPR1 PE=1 SV=1 |
| YCF2_PANGI | Protein Ycf2 OS=Panax ginseng OX=4054 GN=ycf2-A PE=3 SV=1 |
| FH15B_ARATH | Putative formin-like protein 15b OS=Arabidopsis thaliana OX=3702 GN=FH15B PE=3 SV=1 |
| APRR6_ARATH | Putative two-component response regulator-like APRR6 OS=Arabidopsis thaliana OX=3702 GN=APRR6 PE=3 SV=2 |
| RBR_HIEPI | Retinoblastoma-related protein OS=Hieracium piloselloides OX=102746 GN=RBR PE=2 SV=1 |
| NHX8_ARATH | Sodium/hydrogen exchanger 8 OS=Arabidopsis thaliana OX=3702 GN=NHX8 PE=2 SV=1 |
| VP26B_ARATH | Vacuolar protein sorting-associated protein 26B OS=Arabidopsis thaliana OX=3702 GN=VPS26B PE=2 SV=2 |
| MSI4_ARATH | WD-40 repeat-containing protein MSI4 OS=Arabidopsis thaliana OX=3702 GN=MSI4 PE=1 SV=3 |
| C81Q1_SESIN | (+)-piperitol/(+)-sesamin synthase CYP81Q1 OS=Sesamum indicum OX=4182 GN=CYP81Q1 PE=1 SV=1 |
| RID2_ARATH | 18S rRNA (guanine-N(7))-methyltransferase RID2 OS=Arabidopsis thaliana OX=3702 GN=RID2 PE=1 SV=1 |
| RS18_ARATH | 40S ribosomal protein S18 OS=Arabidopsis thaliana OX=3702 GN=RPS18A PE=1 SV=1 |
| RK18_ARATH | 50S ribosomal protein L18, chloroplastic OS=Arabidopsis thaliana OX=3702 GN=RPL18 PE=2 SV=1 |
| SYAP_OSTLU | Alanine--tRNA ligase, chloroplastic/mitochondrial OS=Ostreococcus lucimarinus (strain CCE9901) OX=436017 GN=OSTLU_32618 PE=3 SV=1 |
| CDC23_ARATH | Anaphase-promoting complex subunit 8 OS=Arabidopsis thaliana OX=3702 GN=APC8 PE=1 SV=1 |
| ATPD_ARATH | ATP synthase subunit delta, chloroplastic OS=Arabidopsis thaliana OX=3702 GN=ATPD PE=1 SV=1 |
| Y3649_ARATH | BTB/POZ domain-containing protein At3g26490 OS=Arabidopsis thaliana OX=3702 GN=At3g26490 PE=1 SV=1 |
| CSPLO_ORYSJ | CASP-like protein 4A2 OS=Oryza sativa subsp. japonica OX=39947 GN=Os02g0134500 PE=2 SV=2 |
| CADH3_ARATH | Cinnamyl alcohol dehydrogenase 3 OS=Arabidopsis thaliana OX=3702 GN=CAD3 PE=1 SV=1 |
| CPSF2_ARATH | Cleavage and polyadenylation specificity factor subunit 2 OS=Arabidopsis thaliana OX=3702 GN=CPSF100 PE=1 SV=2 |
| LTN1_ARATH | E3 ubiquitin-protein ligase listerin OS=Arabidopsis thaliana OX=3702 GN=At5g58410 PE=3 SV=1 |
| GRF1_ARATH | Growth-regulating factor 1 OS=Arabidopsis thaliana OX=3702 GN=GRF1 PE=1 SV=1 |
| HIS6A_ARATH | Histidinol-phosphate aminotransferase 1, chloroplastic OS=Arabidopsis thaliana OX=3702 GN=HISN6A PE=1 SV=1 |
| IRE1L_ARATH | Inactive serine/threonine-protein kinase/endoribonuclease IRE1-like OS=Arabidopsis thaliana OX=3702 GN=At3g11870 PE=3 SV=1 |
| LEA19_ORYSI | Late embryogenesis abundant protein 19 OS=Oryza sativa subsp. indica OX=39946 GN=LEA19 PE=1 SV=1 |
| CHLN_OLTVI | Light-independent protochlorophyllide reductase subunit N OS=Oltmannsiellopsis viridis OX=51324 GN=chlN PE=3 SV=1 |
| ERLI1_ARATH | Lipid transfer protein EARLI 1 OS=Arabidopsis thaliana OX=3702 GN=EARLI1 PE=1 SV=1 |
| MPPA_SOLTU | Mitochondrial-processing peptidase subunit alpha OS=Solanum tuberosum OX=4113 GN=MPP PE=1 SV=1 |
| NAC14_ARATH | NAC domain-containing protein 14 OS=Arabidopsis thaliana OX=3702 GN=NAC014 PE=2 SV=1 |
| NU205_ARATH | Nuclear pore complex protein NUP205 OS=Arabidopsis thaliana OX=3702 GN=NUP205 PE=1 SV=1 |
| PATL2_ARATH | Patellin-2 OS=Arabidopsis thaliana OX=3702 GN=PATL2 PE=1 SV=2 |
| PP151_ARATH | Pentatricopeptide repeat-containing protein At2g13600 OS=Arabidopsis thaliana OX=3702 GN=PCMP-E76 PE=3 SV=1 |
| PP275_ARATH | Pentatricopeptide repeat-containing protein At3g49730 OS=Arabidopsis thaliana OX=3702 GN=At3g49730 PE=2 SV=1 |
| PSL5_ARATH | Probable glucan 1,3-alpha-glucosidase OS=Arabidopsis thaliana OX=3702 GN=PSL5 PE=1 SV=1 |
| ANM14_ARATH | Probable histone-arginine methyltransferase 1.4 OS=Arabidopsis thaliana OX=3702 GN=PRMT14 PE=1 SV=1 |
| FTSI1_ARATH | Probable inactive ATP-dependent zinc metalloprotease FTSHI 1, chloroplastic OS=Arabidopsis thaliana OX=3702 GN=FTSHI1 PE=1 SV=1 |
| PAP2_ORYSJ | Probable plastid-lipid-associated protein 2, chloroplastic OS=Oryza sativa subsp. japonica OX=39947 GN=PAP2 PE=2 SV=1 |
| PSB4_ARATH | Proteasome subunit beta type-4 OS=Arabidopsis thaliana OX=3702 GN=PBG1 PE=1 SV=2 |
| SNC1_ARATH | Protein SUPPRESSOR OF npr1-1, CONSTITUTIVE 1 OS=Arabidopsis thaliana OX=3702 GN=SNC1 PE=1 SV=5 |
| YCF2_ILLOL | Protein Ycf2 OS=Illicium oligandrum OX=145286 GN=ycf2 PE=3 SV=1 |
| MRS29_ARATH | Putative magnesium transporter MRS2-9 OS=Arabidopsis thaliana OX=3702 GN=MRS2-9 PE=5 SV=2 |
| KPYA_RICCO | Pyruvate kinase isozyme A, chloroplastic OS=Ricinus communis OX=3988 PE=1 SV=1 |
| RTNLH_ARATH | Reticulon-like protein B8 OS=Arabidopsis thaliana OX=3702 GN=RTNLB8 PE=2 SV=1 |
| 2AAB_ARATH | Serine/threonine-protein phosphatase 2A 65 kDa regulatory subunit A beta isoform OS=Arabidopsis thaliana OX=3702 GN=PP2AA2 PE=1 SV=2 |
| SYS_HELAN | Serine--tRNA ligase OS=Helianthus annuus OX=4232 PE=2 SV=1 |
| SODM_CAPAN | Superoxide dismutase [Mn], mitochondrial OS=Capsicum annuum OX=4072 GN=SODA PE=2 SV=1 |
| TRXM3_ORYSJ | Thioredoxin M3, chloroplastic OS=Oryza sativa subsp. japonica OX=39947 GN=Os04g0430800 PE=2 SV=4 |
| BH027_ARATH | Transcription factor bHLH27 OS=Arabidopsis thaliana OX=3702 GN=BHLH27 PE=2 SV=1 |
| RU2B1_ARATH | U2 small nuclear ribonucleoprotein B'' OS=Arabidopsis thaliana OX=3702 GN=U2B'' PE=1 SV=1 |
| U73C4_SOLLC | UDP-glycosyltransferase 73C4 OS=Solanum lycopersicum OX=4081 GN=UGT73C4 PE=2 SV=1 |
| DCS2_GOSAR | (+)-delta-cadinene synthase isozyme XC14 OS=Gossypium arboreum OX=29729 PE=1 SV=1 |
| RK5_CHAGL | 50S ribosomal protein L5, chloroplastic OS=Chaetosphaeridium globosum OX=96477 GN=rpl5 PE=3 SV=1 |
| RL23_TOBAC | 60S ribosomal protein L23 OS=Nicotiana tabacum OX=4097 GN=RPL23 PE=2 SV=1 |
| ARF1_CHLRE | ADP-ribosylation factor 1 OS=Chlamydomonas reinhardtii OX=3055 GN=ARF1 PE=2 SV=2 |
| FTSH2_ARATH | ATP-dependent zinc metalloprotease FTSH 2, chloroplastic OS=Arabidopsis thaliana OX=3702 GN=FTSH2 PE=1 SV=1 |
| AUL1_ARATH | Auxilin-like protein 1 OS=Arabidopsis thaliana OX=3702 GN=AUL1 PE=2 SV=2 |
| IAA19_ARATH | Auxin-responsive protein IAA19 OS=Arabidopsis thaliana OX=3702 GN=IAA19 PE=1 SV=2 |
| BCCP1_ARATH | Biotin carboxyl carrier protein of acetyl-CoA carboxylase 1, chloroplastic OS=Arabidopsis thaliana OX=3702 GN=BCCP1 PE=1 SV=2 |
| CFA45_CHLRE | Cilia- and flagella-associated protein 45 OS=Chlamydomonas reinhardtii OX=3055 GN=CFAP45 PE=1 SV=1 |
| CND2_ARATH | Condensin complex subunit 2 OS=Arabidopsis thaliana OX=3702 GN=CAPH PE=1 SV=1 |
| FBK56_ARATH | F-box/kelch-repeat protein At3g16740 OS=Arabidopsis thaliana OX=3702 GN=At3g16740 PE=1 SV=1 |
| FBL35_ARATH | F-box/LRR-repeat protein At2g29910 OS=Arabidopsis thaliana OX=3702 GN=At2g29910 PE=2 SV=1 |
| GLR36_ARATH | Glutamate receptor 3.6 OS=Arabidopsis thaliana OX=3702 GN=GLR3.6 PE=2 SV=1 |
| HAC5_ARATH | Histone acetyltransferase HAC5 OS=Arabidopsis thaliana OX=3702 GN=HAC5 PE=2 SV=1 |
| ATB21_ARATH | Homeobox-leucine zipper protein ATHB-21 OS=Arabidopsis thaliana OX=3702 GN=ATHB-21 PE=2 SV=1 |
| LHT2_ARATH | Lysine histidine transporter 2 OS=Arabidopsis thaliana OX=3702 GN=LHT2 PE=1 SV=1 |
| MTHR1_MAIZE | Methylenetetrahydrofolate reductase 1 OS=Zea mays OX=4577 PE=2 SV=1 |
| MPK6_ORYSJ | Mitogen-activated protein kinase 6 OS=Oryza sativa subsp. japonica OX=39947 GN=MPK6 PE=2 SV=1 |
| NDK2_PEA | Nucleoside diphosphate kinase 2, chloroplastic OS=Pisum sativum OX=3888 GN=NDPK2 PE=1 SV=1 |
| OLA1_ARATH | Obg-like ATPase 1 OS=Arabidopsis thaliana OX=3702 GN=YchF1 PE=1 SV=1 |
| HHT1_ARATH | Omega-hydroxypalmitate O-feruloyl transferase OS=Arabidopsis thaliana OX=3702 GN=HHT1 PE=1 SV=1 |
| PP118_ARATH | Pentatricopeptide repeat-containing protein At1g73710 OS=Arabidopsis thaliana OX=3702 GN=At1g73710 PE=2 SV=1 |
| PP267_ARATH | Pentatricopeptide repeat-containing protein At3g47530 OS=Arabidopsis thaliana OX=3702 GN=PCMP-H76 PE=2 SV=1 |
| PMM_SPIOL | Phosphomannomutase OS=Spinacia oleracea OX=3562 GN=PMM PE=1 SV=1 |
| SERB1_ARATH | Phosphoserine aminotransferase 1, chloroplastic OS=Arabidopsis thaliana OX=3702 GN=PSAT1 PE=1 SV=1 |
| PIRL2_ORYSJ | Plant intracellular Ras-group-related LRR protein 2 OS=Oryza sativa subsp. japonica OX=39947 GN=IRL2 PE=2 SV=1 |
| CHR42_ARATH | Protein CHLORORESPIRATORY REDUCTION 42, chloroplastic OS=Arabidopsis thaliana OX=3702 GN=CRR42 PE=1 SV=2 |
| EDSBC_ARATH | Protein EDS1B OS=Arabidopsis thaliana OX=3702 GN=EDS1B PE=1 SV=1 |
| SOK5_ARATH | Protein SOSEKI 5 OS=Arabidopsis thaliana OX=3702 GN=SOK5 PE=1 SV=1 |
| BGL15_ORYSJ | Putative beta-glucosidase 15 OS=Oryza sativa subsp. japonica OX=39947 GN=BGLU15 PE=5 SV=2 |
| FB210_ARATH | Putative F-box protein At3g58960 OS=Arabidopsis thaliana OX=3702 GN=At3g58960 PE=4 SV=1 |
| PFPB_SOLTU | Pyrophosphate--fructose 6-phosphate 1-phosphotransferase subunit beta OS=Solanum tuberosum OX=4113 GN=PFP-BETA PE=1 SV=3 |
| DHSO_ARATH | Sorbitol dehydrogenase OS=Arabidopsis thaliana OX=3702 GN=SDH PE=1 SV=1 |
| RMS3_PEA | Strigolactone esterase RMS3 OS=Pisum sativum OX=3888 GN=RMS3 PE=1 SV=1 |
| BH091_ARATH | Transcription factor bHLH91 OS=Arabidopsis thaliana OX=3702 GN=BHLH91 PE=2 SV=1 |
| PUB34_ARATH | U-box domain-containing protein 34 OS=Arabidopsis thaliana OX=3702 GN=PUB34 PE=3 SV=1 |
| YCF78_OLTVI | Uncharacterized membrane protein ycf78 OS=Oltmannsiellopsis viridis OX=51324 GN=ycf78 PE=3 SV=1 |
| UVSSA_ARATH | UV-stimulated scaffold protein A homolog OS=Arabidopsis thaliana OX=3702 GN=At3g61800 PE=3 SV=1 |
| VILI5_ARATH | Villin-5 OS=Arabidopsis thaliana OX=3702 GN=VLN5 PE=2 SV=1 |
| PRS4_ORYSJ | 26S proteasome regulatory subunit 4 homolog OS=Oryza sativa subsp. japonica OX=39947 GN=TBP2 PE=2 SV=2 |
| ENOX_FRAVE | 2-methylene-furan-3-one reductase OS=Fragaria vesca OX=57918 GN=EO PE=2 SV=2 |
| RL13_TOBAC | 60S ribosomal protein L13 OS=Nicotiana tabacum OX=4097 GN=RPL13 PE=2 SV=1 |
| ILVH2_ARATH | Acetolactate synthase small subunit 2, chloroplastic OS=Arabidopsis thaliana OX=3702 GN=AHASS2 PE=1 SV=1 |
| KU80_ORYSJ | ATP-dependent DNA helicase 2 subunit KU80 OS=Oryza sativa subsp. japonica OX=39947 GN=KU80 PE=1 SV=1 |
| FTSH1_ORYSJ | ATP-dependent zinc metalloprotease FTSH 1, chloroplastic OS=Oryza sativa subsp. japonica OX=39947 GN=FTSH1 PE=2 SV=1 |
| ARFE_ARATH | Auxin response factor 5 OS=Arabidopsis thaliana OX=3702 GN=ARF5 PE=1 SV=3 |
| BIG_ORYSJ | Auxin transport protein BIG OS=Oryza sativa subsp. japonica OX=39947 GN=Os09g0247700 PE=2 SV=1 |
| BT3_ARATH | BTB/POZ and TAZ domain-containing protein 3 OS=Arabidopsis thaliana OX=3702 GN=BT3 PE=1 SV=2 |
| CDPK8_ORYSJ | Calcium-dependent protein kinase 8 OS=Oryza sativa subsp. japonica OX=39947 GN=CPK8 PE=2 SV=1 |
| RKIN1_SECCE | Carbon catabolite-derepressing protein kinase OS=Secale cereale OX=4550 GN=RKIN1 PE=2 SV=1 |
| CCP11_ORYSJ | Cyclin-P1-1 OS=Oryza sativa subsp. japonica OX=39947 GN=CYCP1-1 PE=3 SV=2 |
| CAS1_BETPL | Cycloartenol synthase OS=Betula platyphylla OX=78630 GN=CASBPX1 PE=1 SV=1 |
| C71AM_ARATH | Cytochrome P450 71A22 OS=Arabidopsis thaliana OX=3702 GN=CYP71A22 PE=2 SV=1 |
| CMT1_ORYSJ | DNA (cytosine-5)-methyltransferase CMT1 OS=Oryza sativa subsp. japonica OX=39947 GN=CMT1 PE=3 SV=1 |
| BRE1A_ORYSI | E3 ubiquitin-protein ligase BRE1-like 1 OS=Oryza sativa subsp. indica OX=39946 GN=BRE1A PE=3 SV=2 |
| JMJ24_ARATH | E3 ubiquitin-protein ligase JMJ24 OS=Arabidopsis thaliana OX=3702 GN=JMJ24 PE=1 SV=1 |
| KSL1_ISOER | Ent-kaurene synthase-like 1 OS=Isodon eriocalyx OX=662907 GN=KSL1 PE=2 SV=1 |
| FEN12_SORBI | Flap endonuclease 1-B OS=Sorghum bicolor OX=4558 GN=FEN1-B PE=3 SV=2 |
| SYQ_LUPLU | Glutamine--tRNA ligase OS=Lupinus luteus OX=3873 PE=2 SV=2 |
| IMB1_ARATH | Importin subunit beta-1 OS=Arabidopsis thaliana OX=3702 GN=KPNB1 PE=1 SV=1 |
| NRAM3_ARATH | Metal transporter Nramp3 OS=Arabidopsis thaliana OX=3702 GN=NRAMP3 PE=1 SV=2 |
| MPK18_ARATH | Mitogen-activated protein kinase 18 OS=Arabidopsis thaliana OX=3702 GN=MPK18 PE=1 SV=4 |
| NAC10_ORYSI | NAC transcription factor ONAC010 OS=Oryza sativa subsp. indica OX=39946 GN=ONAC010 PE=3 SV=1 |
| NB5R2_ARATH | NADH-cytochrome b5 reductase-like protein OS=Arabidopsis thaliana OX=3702 GN=CBR2 PE=1 SV=2 |
| PP302_ARATH | Pentatricopeptide repeat-containing protein At4g02820, mitochondrial OS=Arabidopsis thaliana OX=3702 GN=At4g02820 PE=2 SV=1 |
| PHO12_ARATH | Phosphate transporter PHO1 homolog 2 OS=Arabidopsis thaliana OX=3702 GN=PHO1-H2 PE=2 SV=2 |
| PPO_PRUAR | Polyphenol oxidase latent form, chloroplastic OS=Prunus armeniaca OX=36596 GN=PPO PE=1 SV=1 |
| PLA22_ORYSJ | Probable phospholipase A2 homolog 2 OS=Oryza sativa subsp. japonica OX=39947 GN=PLA2-II PE=1 SV=1 |
| PBL15_ARATH | Probable serine/threonine-protein kinase PBL15 OS=Arabidopsis thaliana OX=3702 GN=PBL15 PE=1 SV=1 |
| AGO5_ARATH | Protein argonaute 5 OS=Arabidopsis thaliana OX=3702 GN=AGO5 PE=1 SV=2 |
| CRWN4_ARATH | Protein CROWDED NUCLEI 4 OS=Arabidopsis thaliana OX=3702 GN=CRWN4 PE=1 SV=2 |
| RH44_ARATH | Putative DEAD-box ATP-dependent RNA helicase 44 OS=Arabidopsis thaliana OX=3702 GN=RH44 PE=5 SV=2 |
| SIPL2_ORYSJ | Signal peptide peptidase-like 2 OS=Oryza sativa subsp. japonica OX=39947 GN=SPPL2 PE=2 SV=1 |
| ASK14_ARATH | SKP1-like protein 14 OS=Arabidopsis thaliana OX=3702 GN=ASK14 PE=1 SV=1 |
| TRBP2_ARATH | Tryptophan synthase beta chain 2, chloroplastic OS=Arabidopsis thaliana OX=3702 GN=TSB2 PE=1 SV=2 |
| TLP3_ARATH | Tubby-like F-box protein 3 OS=Arabidopsis thaliana OX=3702 GN=TULP3 PE=1 SV=1 |
| PUB32_ARATH | U-box domain-containing protein 32 OS=Arabidopsis thaliana OX=3702 GN=PUB32 PE=1 SV=1 |
| PUB57_ORYSJ | U-box domain-containing protein 57 OS=Oryza sativa subsp. japonica OX=39947 GN=PUB57 PE=2 SV=1 |
| ATPE_POPAL | ATP synthase epsilon chain, chloroplastic OS=Populus alba OX=43335 GN=atpE PE=3 SV=1 |
| BZP29_ARATH | bZIP transcription factor 29 OS=Arabidopsis thaliana OX=3702 GN=BZIP29 PE=2 SV=1 |
| CALX1_ARATH | Calnexin homolog 1 OS=Arabidopsis thaliana OX=3702 GN=CNX1 PE=1 SV=1 |
| CESA6_ARATH | Cellulose synthase A catalytic subunit 6 [UDP-forming] OS=Arabidopsis thaliana OX=3702 GN=CESA6 PE=1 SV=2 |
| CCD31_ORYSJ | Cyclin-D3-1 OS=Oryza sativa subsp. japonica OX=39947 GN=CYCD3-1 PE=2 SV=2 |
| DRE2E_ARATH | Dehydration-responsive element-binding protein 2E OS=Arabidopsis thaliana OX=3702 GN=DREB2E PE=2 SV=1 |
| DRR1_PEA | Disease resistance response protein Pi176 OS=Pisum sativum OX=3888 PE=2 SV=1 |
| DRM2_ARATH | DNA (cytosine-5)-methyltransferase DRM2 OS=Arabidopsis thaliana OX=3702 GN=DRM2 PE=1 SV=1 |
| GUN19_ORYSJ | Endoglucanase 19 OS=Oryza sativa subsp. japonica OX=39947 GN=Os08g0114200 PE=2 SV=1 |
| GONS2_ARATH | GDP-mannose transporter GONST2 OS=Arabidopsis thaliana OX=3702 GN=GONST2 PE=2 SV=1 |
| GLPK_ARATH | Glycerol kinase OS=Arabidopsis thaliana OX=3702 GN=GLPK PE=1 SV=1 |
| ATXR7_ARATH | Histone-lysine N-methyltransferase ATXR7 OS=Arabidopsis thaliana OX=3702 GN=ATXR7 PE=2 SV=1 |
| EZ2_MAIZE | Histone-lysine N-methyltransferase EZ2 OS=Zea mays OX=4577 GN=EZ2 PE=2 SV=1 |
| LOX21_SOLTU | Linoleate 13S-lipoxygenase 2-1, chloroplastic OS=Solanum tuberosum OX=4113 GN=LOX2.1 PE=1 SV=1 |
| MOC2A_ORYSI | Molybdopterin synthase sulfur carrier subunit OS=Oryza sativa subsp. indica OX=39946 GN=OsI_07667 PE=3 SV=1 |
| ORC5_ORYSI | Origin of replication complex subunit 5 OS=Oryza sativa subsp. indica OX=39946 GN=OsI_13614 PE=3 SV=1 |
| OP24B_ARATH | Outer envelope pore protein 24B, chloroplastic OS=Arabidopsis thaliana OX=3702 GN=OEP24B PE=2 SV=1 |
| C3H_NARPS | p-coumarate 3-hydroxylase OS=Narcissus pseudonarcissus OX=39639 GN=C3H PE=2 SV=1 |
| OTP51_ORYSJ | Pentatricopeptide repeat-containing protein OTP51, chloroplastic OS=Oryza sativa subsp. japonica OX=39947 GN=OTP51 PE=3 SV=1 |
| Y2165_ARATH | Probable LRR receptor-like serine/threonine-protein kinase At2g16250 OS=Arabidopsis thaliana OX=3702 GN=At2g16250 PE=1 SV=1 |
| BLT_ARATH | Protein BRANCHLESS TRICHOME OS=Arabidopsis thaliana OX=3702 GN=BLT PE=1 SV=1 |
| PRD1_ARATH | Protein PUTATIVE RECOMBINATION INITIATION DEFECT 1 OS=Arabidopsis thaliana OX=3702 GN=PRD1 PE=1 SV=3 |
| RMD5_ARATH | Protein RMD5 homolog OS=Arabidopsis thaliana OX=3702 GN=RMD5 PE=1 SV=1 |
| ROH1_ARATH | Protein ROH1 OS=Arabidopsis thaliana OX=3702 GN=ROH1 PE=1 SV=1 |
| SP1L4_ARATH | Protein SPIRAL1-like 4 OS=Arabidopsis thaliana OX=3702 GN=SP1L4 PE=2 SV=1 |
| SRF5_ARATH | Protein STRUBBELIG-RECEPTOR FAMILY 5 OS=Arabidopsis thaliana OX=3702 GN=SRF5 PE=1 SV=1 |
| TTG1_ARATH | Protein TRANSPARENT TESTA GLABRA 1 OS=Arabidopsis thaliana OX=3702 GN=TTG1 PE=1 SV=1 |
| Y4117_ARATH | Putative disease resistance protein At4g11170 OS=Arabidopsis thaliana OX=3702 GN=At4g11170 PE=2 SV=1 |
| SIGE_ARATH | RNA polymerase sigma factor sigE, chloroplastic/mitochondrial OS=Arabidopsis thaliana OX=3702 GN=SIGE PE=1 SV=1 |
| SKIP_ARATH | SNW/SKI-interacting protein OS=Arabidopsis thaliana OX=3702 GN=SKIP PE=1 SV=1 |
| SBT35_ARATH | Subtilisin-like protease SBT3.5 OS=Arabidopsis thaliana OX=3702 GN=SBT3.5 PE=1 SV=1 |
| PUB19_ARATH | U-box domain-containing protein 19 OS=Arabidopsis thaliana OX=3702 GN=PUB19 PE=2 SV=1 |
| C3H14_ORYSJ | Zinc finger CCCH domain-containing protein 14 OS=Oryza sativa subsp. japonica OX=39947 GN=Os02g0194200 PE=2 SV=1 |
| BAM3_ARATH | Beta-amylase 3, chloroplastic OS=Arabidopsis thaliana OX=3702 GN=BAM3 PE=1 SV=3 |
| CDPKN_ORYSJ | Calcium-dependent protein kinase 23 OS=Oryza sativa subsp. japonica OX=39947 GN=CPK23 PE=1 SV=2 |
| CFM3B_ARATH | CRM-domain containing factor CFM3B, chloroplastic OS=Arabidopsis thaliana OX=3702 GN=CFM3B PE=1 SV=1 |
| CCA32_ORYSJ | Cyclin-A3-2 OS=Oryza sativa subsp. japonica OX=39947 GN=CYCA3-2 PE=2 SV=1 |
| DRP3A_ARATH | Dynamin-related protein 3A OS=Arabidopsis thaliana OX=3702 GN=DRP3A PE=1 SV=2 |
| Y4449_ARATH | FHA domain-containing protein At4g14490 OS=Arabidopsis thaliana OX=3702 GN=At4g14490 PE=1 SV=1 |
| NADE_ORYSI | Glutamine-dependent NAD(+) synthetase OS=Oryza sativa subsp. indica OX=39946 GN=OsI_25032 PE=3 SV=1 |
| GG2_ORYSI | Guanine nucleotide-binding protein subunit gamma 2 OS=Oryza sativa subsp. indica OX=39946 GN=RGG2 PE=2 SV=1 |
| H12_VOLCA | Histone H1-II OS=Volvox carteri OX=3067 GN=H1-II PE=2 SV=3 |
| LECA_VICSA | Mitogenic lectin alpha chain OS=Vicia sativa OX=3908 PE=1 SV=1 |
| NOG1_ARATH | Nucleolar GTP-binding protein 1 OS=Arabidopsis thaliana OX=3702 GN=At1g50920 PE=2 SV=1 |
| PP312_ARATH | Pentatricopeptide repeat-containing protein At4g14850 OS=Arabidopsis thaliana OX=3702 GN=LOI1 PE=1 SV=1 |
| MSRA_LACSA | Peptide methionine sulfoxide reductase OS=Lactuca sativa OX=4236 PE=2 SV=1 |
| BXL2_ARATH | Probable beta-D-xylosidase 2 OS=Arabidopsis thaliana OX=3702 GN=BXL2 PE=2 SV=1 |
| CAD8D_ORYSJ | Probable cinnamyl alcohol dehydrogenase 8D OS=Oryza sativa subsp. japonica OX=39947 GN=CAD8D PE=2 SV=1 |
| FBD36_ARATH | Probable FBD-associated F-box protein At5g38565 OS=Arabidopsis thaliana OX=3702 GN=At5g38565 PE=2 SV=2 |
| PMTR_ARATH | Probable methyltransferase PMT27 OS=Arabidopsis thaliana OX=3702 GN=At3g51070 PE=3 SV=1 |
| NET2D_ARATH | Protein NETWORKED 2D OS=Arabidopsis thaliana OX=3702 GN=NET2D PE=3 SV=1 |
| PHOX3_ARATH | Protein PHOX3 OS=Arabidopsis thaliana OX=3702 GN=PHOX3 PE=1 SV=1 |
| TPLAT_ARATH | Protein TPLATE OS=Arabidopsis thaliana OX=3702 GN=TPLATE PE=1 SV=1 |
| PPA8_ARATH | Purple acid phosphatase 8 OS=Arabidopsis thaliana OX=3702 GN=PAP8 PE=2 SV=1 |
| FBD12_ARATH | Putative FBD-associated F-box protein At3g60710 OS=Arabidopsis thaliana OX=3702 GN=At3g60710 PE=4 SV=1 |
| PDP1_ARATH | PWWP domain-containing protein 1 OS=Arabidopsis thaliana OX=3702 GN=PDP1 PE=1 SV=1 |
| RETO_PAPSO | Reticuline oxidase OS=Papaver somniferum OX=3469 GN=BBE1 PE=2 SV=1 |
| SUR1_ARATH | S-alkyl-thiohydroximate lyase SUR1 OS=Arabidopsis thaliana OX=3702 GN=SUR1 PE=1 SV=1 |
| SAE2_ARATH | SUMO-activating enzyme subunit 2 OS=Arabidopsis thaliana OX=3702 GN=SAE2 PE=1 SV=1 |
| SY122_ARATH | Syntaxin-122 OS=Arabidopsis thaliana OX=3702 GN=SYP122 PE=1 SV=1 |
| MTB1_SOLLC | Transcription factor MTB1 OS=Solanum lycopersicum OX=4081 GN=MTB1 PE=1 SV=1 |
| BCB3_ARATH | Uclacyanin-3 OS=Arabidopsis thaliana OX=3702 GN=UCC3 PE=2 SV=1 |
| Y4179_ARATH | UPF0725 protein At4g17990 OS=Arabidopsis thaliana OX=3702 GN=At4g17990 PE=3 SV=2 |
| C3H11_ORYSJ | Zinc finger CCCH domain-containing protein 11 OS=Oryza sativa subsp. japonica OX=39947 GN=Os01g0834700 PE=2 SV=2 |
| ISPE_ARATH | 4-diphosphocytidyl-2-C-methyl-D-erythritol kinase, chloroplastic OS=Arabidopsis thaliana OX=3702 GN=ISPE PE=2 SV=1 |
| RK32_PELHO | 50S ribosomal protein L32, chloroplastic OS=Pelargonium hortorum OX=4031 GN=rpl32-A PE=3 SV=1 |
| Y3440_ARATH | B3 domain-containing protein At4g34400 OS=Arabidopsis thaliana OX=3702 GN=At4g34400 PE=2 SV=2 |
| REM23_ARATH | B3 domain-containing protein REM23 OS=Arabidopsis thaliana OX=3702 GN=REM23 PE=2 SV=1 |
| PHR2_ARATH | Blue-light photoreceptor PHR2 OS=Arabidopsis thaliana OX=3702 GN=PHR2 PE=2 SV=2 |
| CASP3_SORBI | Casparian strip membrane protein 3 OS=Sorghum bicolor OX=4558 GN=Sb10g008220 PE=2 SV=1 |
| C71B8_ARATH | Cytochrome P450 71B8 OS=Arabidopsis thaliana OX=3702 GN=CYP71B8 PE=3 SV=1 |
| C77A2_SOLME | Cytochrome P450 77A2 OS=Solanum melongena OX=4111 GN=CYP77A2 PE=2 SV=1 |
| BIN4_ARATH | DNA-binding protein BIN4 OS=Arabidopsis thaliana OX=3702 GN=BIN4 PE=1 SV=2 |
| RPOA_AUSVE | DNA-directed RNA polymerase subunit alpha OS=Australopyrum velutinum OX=58935 GN=rpoA PE=3 SV=1 |
| GUN12_ORYSJ | Endoglucanase 12 OS=Oryza sativa subsp. japonica OX=39947 GN=GLU3 PE=2 SV=2 |
| FH18_ORYSJ | Formin-like protein 18 OS=Oryza sativa subsp. japonica OX=39947 GN=FH18 PE=2 SV=1 |
| LAC17_ARATH | Laccase-17 OS=Arabidopsis thaliana OX=3702 GN=LAC17 PE=2 SV=1 |
| MTA70_ARATH | N6-adenosine-methyltransferase MT-A70-like OS=Arabidopsis thaliana OX=3702 GN=MTA PE=1 SV=2 |
| NDUB9_ARATH | NADH dehydrogenase [ubiquinone] 1 beta subcomplex subunit 9 OS=Arabidopsis thaliana OX=3702 GN=CIB22 PE=1 SV=1 |
| GP210_ARATH | Nuclear pore complex protein GP210 OS=Arabidopsis thaliana OX=3702 GN=GB210 PE=1 SV=1 |
| PHO1A_ARATH | Phosphate transporter PHO1 homolog 10 OS=Arabidopsis thaliana OX=3702 GN=PHO1-H10 PE=2 SV=1 |
| Y4312_ARATH | Probable LRR receptor-like serine/threonine-protein kinase At4g31250 OS=Arabidopsis thaliana OX=3702 GN=At4g31250 PE=1 SV=1 |
| FBD34_ARATH | Putative FBD-associated F-box protein At1g05080 OS=Arabidopsis thaliana OX=3702 GN=At1g05080 PE=4 SV=2 |
| RRP5_ARATH | rRNA biogenesis protein RRP5 OS=Arabidopsis thaliana OX=3702 GN=RRP5 PE=2 SV=2 |
| SBT3G_ARATH | Subtilisin-like protease SBT3.16 OS=Arabidopsis thaliana OX=3702 GN=SBT3.16 PE=2 SV=1 |
| MST8_ORYSJ | Sugar transport protein MST8 OS=Oryza sativa subsp. japonica OX=39947 GN=MST8 PE=2 SV=2 |
| MYB4_ORYSJ | Transcription factor MYB4 OS=Oryza sativa subsp. japonica OX=39947 GN=MYB4 PE=2 SV=2 |
| PUB51_ARATH | U-box domain-containing protein 51 OS=Arabidopsis thaliana OX=3702 GN=PUB51 PE=2 SV=2 |
| VP35A_ARATH | Vacuolar protein sorting-associated protein 35A OS=Arabidopsis thaliana OX=3702 GN=VPS35A PE=1 SV=1 |
| RR3_CALFG | 30S ribosomal protein S3, chloroplastic OS=Calycanthus floridus var. glaucus OX=212734 GN=rps3 PE=3 SV=1 |
| HGGL1_MAIZE | 4-hydroxy-7-methoxy-3-oxo-3,4-dihydro-2H-1,4-benzoxazin-2-yl glucoside beta-D-glucosidase 1, chloroplastic OS=Zea mays OX=4577 GN=GLU1 PE=1 SV=1 |
| GET3C_ARATH | ATPase GET3C OS=Arabidopsis thaliana OX=3702 GN=GET3C PE=2 SV=1 |
| CML3_ORYSJ | Calmodulin-like protein 3 OS=Oryza sativa subsp. japonica OX=39947 GN=CML3 PE=2 SV=1 |
| CERK1_ARATH | Chitin elicitor receptor kinase 1 OS=Arabidopsis thaliana OX=3702 GN=CERK1 PE=1 SV=1 |
| CWZF7_ORYSJ | Cysteine-tryptophan domain-containing zinc finger protein 7 OS=Oryza sativa subsp. japonica OX=39947 GN=CWZF7 PE=1 SV=2 |
| FPP1_ARATH | Filament-like plant protein 1 OS=Arabidopsis thaliana OX=3702 GN=FPP1 PE=2 SV=1 |
| FLOT2_ORYSJ | Flotillin-like protein 2 OS=Oryza sativa subsp. japonica OX=39947 GN=FLOT2 PE=3 SV=1 |
| GDL10_ARATH | GDSL esterase/lipase At1g28610 OS=Arabidopsis thaliana OX=3702 GN=At1g28610 PE=2 SV=2 |
| GOGC3_ARATH | Golgin candidate 3 OS=Arabidopsis thaliana OX=3702 GN=GC3 PE=1 SV=1 |
| SLAC1_ARATH | Guard cell S-type anion channel SLAC1 OS=Arabidopsis thaliana OX=3702 GN=SLAC1 PE=1 SV=1 |
| HPP5_ARATH | Heptahelical transmembrane protein 5 OS=Arabidopsis thaliana OX=3702 GN=HHP5 PE=2 SV=1 |
| KNAT5_ARATH | Homeobox protein knotted-1-like 5 OS=Arabidopsis thaliana OX=3702 GN=KNAT5 PE=1 SV=2 |
| PP117_ARATH | Pentatricopeptide repeat-containing protein At1g73400, mitochondrial OS=Arabidopsis thaliana OX=3702 GN=At1g73400 PE=2 SV=2 |
| TAT3_ARATH | Probable aminotransferase TAT3 OS=Arabidopsis thaliana OX=3702 GN=TAT3 PE=2 SV=1 |
| PTR16_ARATH | Protein NRT1/ PTR FAMILY 4.3 OS=Arabidopsis thaliana OX=3702 GN=NPF4.3 PE=2 SV=1 |
| PDC2_TOBAC | Pyruvate decarboxylase 2 OS=Nicotiana tabacum OX=4097 GN=PDC2 PE=2 SV=1 |
| RT12_PROWI | Ribosomal protein S12, mitochondrial OS=Prototheca wickerhamii OX=3111 GN=RPS12 PE=3 SV=1 |
| F6CGT_GENTR | UDP-glycosyltransferase UF6CGT1 OS=Gentiana triflora OX=55190 GN=UF6CGT1 PE=2 SV=1 |
| Y4645_ARATH | Uncharacterized protein At4g26450 OS=Arabidopsis thaliana OX=3702 GN=At4g26450 PE=4 SV=1 |
| U603_ORYSI | UPF0603 protein OsI_019212, chloroplastic OS=Oryza sativa subsp. indica OX=39946 GN=OsI_19898 PE=3 SV=2 |
| C3H55_ORYSJ | Zinc finger CCCH domain-containing protein 55 OS=Oryza sativa subsp. japonica OX=39947 GN=Os08g0135800 PE=2 SV=1 |
| SEC22_ARATH | 25.3 kDa vesicle transport protein OS=Arabidopsis thaliana OX=3702 GN=SEC22 PE=2 SV=1 |
| AB1F_ARATH | ABC transporter F family member 1 OS=Arabidopsis thaliana OX=3702 GN=ABCF1 PE=2 SV=1 |
| ARP6_ARATH | Actin-related protein 6 OS=Arabidopsis thaliana OX=3702 GN=ARP6 PE=1 SV=1 |
| CACLC_ORYSJ | Anoctamin-like protein Os01g0706700 OS=Oryza sativa subsp. japonica OX=39947 GN=Os01g0706700 PE=2 SV=1 |
| ARFJ_ARATH | Auxin response factor 10 OS=Arabidopsis thaliana OX=3702 GN=ARF10 PE=1 SV=1 |
| Y7797_ORYSJ | B3 domain-containing protein Os07g0679700 OS=Oryza sativa subsp. japonica OX=39947 GN=Os07g0679700 PE=2 SV=1 |
| HMA9_ORYSJ | Cation-transporting ATPase HMA5 OS=Oryza sativa subsp. japonica OX=39947 GN=HMA9 PE=2 SV=1 |
| CAB6_ARATH | Chlorophyll a-b binding protein 6, chloroplastic OS=Arabidopsis thaliana OX=3702 GN=LHCA1 PE=1 SV=1 |
| DEF10_ARATH | Defensin-like protein 10 OS=Arabidopsis thaliana OX=3702 GN=PDF2.6 PE=3 SV=1 |
| ERF57_ARATH | Ethylene-responsive transcription factor ERF057 OS=Arabidopsis thaliana OX=3702 GN=ERF057 PE=2 SV=1 |
| EIF3C_MEDTR | Eukaryotic translation initiation factor 3 subunit C OS=Medicago truncatula OX=3880 GN=TIF3C1 PE=2 SV=1 |
| FLS_PETHY | Flavonol synthase/flavanone 3-hydroxylase OS=Petunia hybrida OX=4102 GN=FL PE=2 SV=1 |
| RAM2_MEDTR | Glycerol-3-phosphate acyltransferase RAM2 OS=Medicago truncatula OX=3880 GN=RAM2 PE=2 SV=1 |
| YSL3_ARATH | Metal-nicotianamine transporter YSL3 OS=Arabidopsis thaliana OX=3702 GN=YSL3 PE=2 SV=1 |
| MTM1_ARATH | Mitochondrial carrier protein MTM1 OS=Arabidopsis thaliana OX=3702 GN=MTM1 PE=2 SV=1 |
| PPR5_ORYSJ | Pentatricopeptide repeat-containing protein PPR5 homolog, chloroplastic OS=Oryza sativa subsp. japonica OX=39947 GN=Os02g0750400 PE=3 SV=2 |
| HPI_HEVBR | Protease inhibitor HPI OS=Hevea brasiliensis OX=3981 GN=PI1 PE=1 SV=2 |
| AXR4_ARATH | Protein AUXIN RESPONSE 4 OS=Arabidopsis thaliana OX=3702 GN=AXR4 PE=1 SV=1 |
| IQD2_ARATH | Protein IQ-DOMAIN 2 OS=Arabidopsis thaliana OX=3702 GN=IQD2 PE=1 SV=1 |
| AML1_ARATH | Protein MEI2-like 1 OS=Arabidopsis thaliana OX=3702 GN=ML1 PE=1 SV=1 |
| RR2B_CHLRE | Putative 30S ribosomal S2-like protein OS=Chlamydomonas reinhardtii OX=3055 GN=rps2-2 PE=5 SV=1 |
| PDX11_ARATH | Pyridoxal 5'-phosphate synthase subunit PDX1.1 OS=Arabidopsis thaliana OX=3702 GN=PDX11 PE=1 SV=1 |
| SSY3A_ORYSJ | Soluble starch synthase 3a, chloroplastic/amyloplastic OS=Oryza sativa subsp. japonica OX=39947 GN=SSIIIA PE=1 SV=2 |
| MYC4_ARATH | Transcription factor MYC4 OS=Arabidopsis thaliana OX=3702 GN=MYC4 PE=1 SV=1 |
| PUB18_ARATH | U-box domain-containing protein 18 OS=Arabidopsis thaliana OX=3702 GN=PUB18 PE=1 SV=1 |
| Y8187_ORYSJ | Uncharacterized protein Os08g0218700/LOC_Os08g12160 OS=Oryza sativa subsp. japonica OX=39947 GN=Os08g0218700 PE=1 SV=1 |
| PIOX_ORYSJ | Alpha-dioxygenase PIOX OS=Oryza sativa subsp. japonica OX=39947 GN=PIOX PE=1 SV=2 |
| AADH1_SOLLC | Aminoaldehyde dehydrogenase 1 OS=Solanum lycopersicum OX=4081 GN=AMADH1 PE=1 SV=1 |
| BOSS_BOTBR | Botryococcus squalene synthase OS=Botryococcus braunii OX=38881 GN=SSL-2 PE=1 SV=1 |
| PETD_PSINU | Cytochrome b6-f complex subunit 4 OS=Psilotum nudum OX=3240 GN=petD PE=3 SV=1 |
| HEM2_HORVU | Delta-aminolevulinic acid dehydratase, chloroplastic OS=Hordeum vulgare OX=4513 GN=HEMB PE=2 SV=1 |
| ETFB_ARATH | Electron transfer flavoprotein subunit beta, mitochondrial OS=Arabidopsis thaliana OX=3702 GN=ETFB PE=1 SV=1 |
| GMD1_ARATH | GDP-mannose 4,6 dehydratase 1 OS=Arabidopsis thaliana OX=3702 GN=GMD1 PE=1 SV=1 |
| GLGL3_ORYSJ | Glucose-1-phosphate adenylyltransferase large subunit 3, chloroplastic/amyloplastic OS=Oryza sativa subsp. japonica OX=39947 GN=AGPL3 PE=1 SV=1 |
| GLRX_VERFO | Glutaredoxin OS=Vernicia fordii OX=73154 PE=3 SV=1 |
| HIS8_TOBAC | Histidinol-phosphate aminotransferase, chloroplastic OS=Nicotiana tabacum OX=4097 GN=HPA PE=2 SV=1 |
| NTF2_ARATH | Nuclear transport factor 2 OS=Arabidopsis thaliana OX=3702 GN=NTF2 PE=1 SV=1 |
| PP279_ARATH | Pentatricopeptide repeat-containing protein At3g53170 OS=Arabidopsis thaliana OX=3702 GN=At3g53170 PE=3 SV=1 |
| PER41_ARATH | Peroxidase 41 OS=Arabidopsis thaliana OX=3702 GN=PER41 PE=3 SV=1 |
| PIA1_ARATH | Phytochrome-interacting ankyrin-repeat protein 1 OS=Arabidopsis thaliana OX=3702 GN=PIA1 PE=2 SV=1 |
| PLST4_ARATH | Plastidic glucose transporter 4 OS=Arabidopsis thaliana OX=3702 GN=At5g16150 PE=1 SV=2 |
| MTHR_ORYSJ | Probable methylenetetrahydrofolate reductase OS=Oryza sativa subsp. japonica OX=39947 GN=Os03g0815200 PE=2 SV=1 |
| MOS1_ARATH | Protein MODIFIER OF SNC1 1 OS=Arabidopsis thaliana OX=3702 GN=MOS1 PE=1 SV=2 |
| NAKR3_ARATH | Protein SODIUM POTASSIUM ROOT DEFECTIVE 3 OS=Arabidopsis thaliana OX=3702 GN=NAKR3 PE=2 SV=1 |
| RBR1_PEA | Retinoblastoma-related protein 1 OS=Pisum sativum OX=3888 GN=RBR1 PE=2 SV=1 |
| AFC1_ARATH | Serine/threonine-protein kinase AFC1 OS=Arabidopsis thaliana OX=3702 GN=AFC1 PE=2 SV=2 |
| SYYC1_ARATH | Tyrosine--tRNA ligase 1, cytoplasmic OS=Arabidopsis thaliana OX=3702 GN=At2g33840 PE=2 SV=1 |
| RK33_ADICA | 50S ribosomal protein L33, chloroplastic OS=Adiantum capillus-veneris OX=13818 GN=rpl33 PE=2 SV=2 |
| RL192_ARATH | 60S ribosomal protein L19-2 OS=Arabidopsis thaliana OX=3702 GN=RPL19B PE=2 SV=1 |
| SAUBS_SANAS | Beta-bisabolene synthase OS=Santalum austrocaledonicum OX=293154 PE=2 SV=2 |
| CDPKM_ARATH | Calcium-dependent protein kinase 22 OS=Arabidopsis thaliana OX=3702 GN=CPK22 PE=3 SV=2 |
| CCD52_ORYSJ | Cyclin-D5-2 OS=Oryza sativa subsp. japonica OX=39947 GN=CYCD5-2 PE=2 SV=1 |
| C90B2_ORYSI | Cytochrome P450 90B2 OS=Oryza sativa subsp. indica OX=39946 GN=CYP90B2 PE=3 SV=1 |
| R13L4_ARATH | Disease resistance RPP13-like protein 4 OS=Arabidopsis thaliana OX=3702 GN=RPP13L4 PE=1 SV=2 |
| DOF1_ORYSJ | Dof zinc finger protein 1 OS=Oryza sativa subsp. japonica OX=39947 GN=DOF1 PE=2 SV=1 |
| SECAA_ARATH | Exocyst complex component SEC10a OS=Arabidopsis thaliana OX=3702 GN=SEC10a PE=1 SV=1 |
| FB135_ARATH | F-box protein At3g07870 OS=Arabidopsis thaliana OX=3702 GN=At3g07870 PE=2 SV=1 |
| Y1343_ARATH | G-type lectin S-receptor-like serine/threonine-protein kinase At1g34300 OS=Arabidopsis thaliana OX=3702 GN=At1g34300 PE=1 SV=1 |
| GCN5_ORYSJ | Histone acetyltransferase GCN5 OS=Oryza sativa subsp. japonica OX=39947 GN=GCN5 PE=1 SV=1 |
| ILL6_ORYSJ | IAA-amino acid hydrolase ILR1-like 6 OS=Oryza sativa subsp. japonica OX=39947 GN=ILL6 PE=2 SV=1 |
| ICP55_ARATH | Intermediate cleaving peptidase 55, mitochondrial OS=Arabidopsis thaliana OX=3702 GN=ICP55 PE=1 SV=1 |
| NDHK_ANGEV | NAD(P)H-quinone oxidoreductase subunit K, chloroplastic OS=Angiopteris evecta OX=13825 GN=ndhK PE=3 SV=1 |
| SKOR_ARATH | Potassium channel SKOR OS=Arabidopsis thaliana OX=3702 GN=SKOR PE=1 SV=1 |
| OSB2_ARATH | Protein OSB2, chloroplastic OS=Arabidopsis thaliana OX=3702 GN=OSB2 PE=1 SV=2 |
| PP2B8_ARATH | Putative F-box protein PP2-B8 OS=Arabidopsis thaliana OX=3702 GN=PP2B8 PE=4 SV=1 |
| TCPA_ARATH | T-complex protein 1 subunit alpha OS=Arabidopsis thaliana OX=3702 GN=CCT1 PE=1 SV=1 |
| TRPA1_ARATH | Tryptophan synthase alpha chain OS=Arabidopsis thaliana OX=3702 GN=TRPA1 PE=1 SV=2 |
| PUB13_ARATH | U-box domain-containing protein 13 OS=Arabidopsis thaliana OX=3702 GN=PUB13 PE=1 SV=1 |
| AROC2_SOLLC | Chorismate synthase 2, chloroplastic OS=Solanum lycopersicum OX=4081 GN=CS2 PE=2 SV=1 |
| DGAT1_CORAE | Diacylglycerol O-acyltransferase 1 OS=Corylus americana OX=78632 GN=DGAT1 PE=1 SV=1 |
| DFRA_ANTMA | Dihydroflavonol 4-reductase OS=Antirrhinum majus OX=4151 GN=DFRA PE=2 SV=1 |
| LIG6_ARATH | DNA ligase 6 OS=Arabidopsis thaliana OX=3702 GN=LIG6 PE=2 SV=1 |
| ETR1_PASED | Ethylene receptor OS=Passiflora edulis OX=78168 GN=ETR1 PE=2 SV=1 |
| FRI_MALBX | Ferritin, chloroplastic OS=Malus baccata var. xiaojinensis OX=141206 PE=3 SV=1 |
| LIAS2_PEA | Lipoyl synthase 2, mitochondrial OS=Pisum sativum OX=3888 GN=LIP1-2 PE=2 SV=1 |
| PEN5_ARATH | Marneral synthase OS=Arabidopsis thaliana OX=3702 GN=MRN1 PE=1 SV=1 |
| PSAB_CHLVU | Photosystem I P700 chlorophyll a apoprotein A2 OS=Chlorella vulgaris OX=3077 GN=psaB PE=3 SV=1 |
| PITH1_ARATH | PITH domain-containing protein At3g04780 OS=Arabidopsis thaliana OX=3702 GN=At3g04780 PE=1 SV=2 |
| AGD6_ARATH | Probable ADP-ribosylation factor GTPase-activating protein AGD6 OS=Arabidopsis thaliana OX=3702 GN=AGD6 PE=1 SV=1 |
| PHT42_ORYSJ | Probable anion transporter 2, chloroplastic OS=Oryza sativa subsp. japonica OX=39947 GN=PHT4;2 PE=2 SV=1 |
| PAP12_ARATH | Probable plastid-lipid-associated protein 12, chloroplastic OS=Arabidopsis thaliana OX=3702 GN=PAP12 PE=1 SV=1 |
| MRS2G_ORYSI | Putative magnesium transporter MRS2-G OS=Oryza sativa subsp. indica OX=39946 GN=MRS2-G PE=3 SV=2 |
| SPT52_ARATH | Putative transcription elongation factor SPT5 homolog 2 OS=Arabidopsis thaliana OX=3702 GN=At2g34210 PE=3 SV=2 |
| MAG2L_ARATH | RINT1-like protein MAG2L OS=Arabidopsis thaliana OX=3702 GN=MAG2L PE=2 SV=1 |
| TAX2_ARATH | Signaling peptide TAXIMIN 2 OS=Arabidopsis thaliana OX=3702 GN=TAX2 PE=2 SV=1 |
| IF1C_DAUCA | Translation initiation factor IF-1, chloroplastic OS=Daucus carota OX=4039 GN=infA PE=3 SV=1 |

**Table S4.** Common proteins identified in the proteome of both the EVs from *S. sclarea* and *S. dominica*

| 14-3-3-like protein GF14 |
| --- |
| ABC transporter G family member 33 |
| Actin |
| Alpha-mannosidase |
| ATP synthase subunit alpha |
| Berberine bridge enzyme-like |
| Calcium-dependent protein kinase 20 |
| Elongation factor 1-alpha |
| Eukaryotic initiation factor 4A |
| Glyceraldehyde-3-phosphate dehydrogenase 2 |
| Heat shock 70 kDa protein |
| NADP-dependent malic enzyme |
| Protein TIFY 10A |
| Putative disease resistance protein RGA3 |
| Ribulose bisphosphate carboxylase/oxygenase activase |

| **Table S5**. Common proteins identified in *Salvia* and *Arabidopsis* EV proteomes | | | | | | |
| --- | --- | --- | --- | --- | --- | --- |
| **Common proteins** | |  |  |  |
| 14-3-3-like protein GF14 | | |  |  |
| ABC transporter G family member 33 | | | |  |
| Actin |  |  |  |  |
| ATP synthase subunit alpha | | |  |  |
| Calcium-dependent protein kinase 20 | | | |  |
| Glyceraldehyde-3-phosphate dehydrogenase 2 | | | | |
| Heat shock 70 kDa protein | | |  |  |
| NADP-dependent malic enzyme | | |  |  |
| Ribulose bisphosphate carboxylase/oxygenase activase | | | | | |

| **Table S6**. Common proteins identified in *Salvia* and Human proteomes | | |
| --- | --- | --- |
| ***Salvia* protein** | **Human protein** | **% of identity** |
| 14-3-3-like protein GF14 | WHAE | 69.1 |
| Actin | ACTA1 | 89.0 |
| ATP synthase subunit alpha | ATP5F1A | 59.3 |
| Elongation factor 1-alpha | EEF1A1 | 76.4 |
| Glyceraldehyde-3-phosphate dehydrogenase 2 | GAPD | 68.0 |
| Eukaryotic initiation factor 4A | ELF4A | 72.3 |
| Heat shock 70 kDa protein | GRP75 | 66.8 |
| NADP-dependent malic enzyme | ME1-201 | 51.6 |

**Figure S2**. Assessment of EV safety in SH-SY5Y cell cultures. Cells were exposed to EVs in the range of 108-104 vesicles, then cell viability was examined by MTT assay.

**Figure S3**. Confocal analysis of SH-SY5Y treated with EV-depleted medium containing the excess of free dye. A-D, control cells; E-F, SH-SY5Y after 24 h incubation with EV-depleted medium.

Isolated fluorescent spots were detected inside the cytoplasm (G and H). Scale bar: 20 mm

**Figure S4**. Evaluation of the effects of EV-depleted media of *S. sclarea* and *S. dominica* (A and B, respectively) and nonconditioned (C) in6-OHDA-treated SH-SY5Y cells

**Figure S5**. Evaluation of the effects of *S. sclarea* and *S. dominica* EVs on the viability of 6-OHDA-induced SH-SY5Y. MTT analysis was performed 24 h after 6-OHDA treatment.

**Table S7.** List of metabolites identified in cell pellets of *Salvia sclarea* and *Salvia dominica* using UHPLC-HRMS operating in positive ionization mode. These metabolites are specifically associated with the 6-OHDA class and were detected through the loading plots. Metabolites identification and validation was meticulously conducted by cross-referencing spectra observed in Compound DiscovererTM with those available in the Human Metabolome Database (HMDB). Such analysis points out the distinctive metabolic profile of 6-OHDA class compared to S, S+6-OHDA and CTRL classes. × and – indicate the presence or absence of metabolites, respectively.

| **Compounds** | **RT (min)** | **MW** | ***m/z*** | **HMDB** | **KEGG** | **Chemical**  **Formula** | **Error (ppm)** | ***Salvia sclarea*** | ***Salvia dominica*** |
| --- | --- | --- | --- | --- | --- | --- | --- | --- | --- |
| Cystathionine | 0.744 | 222.06755 | 223.07483 | HMDB0000099 | C02291 | C7H14N2O4S | 0.57 | – | × |
| Hypotaurine | 0.749 | 109.01975 | 110.02703 | HMDB0000965 | C00519 | C2H7NO2S | 0.04 | – | × |
| Glutamine | 0.752 | 146.06922 | 147.0765 | HMDB0000641 | C00064 | C5H10N2O3 | 0.55 | – | × |
| Dimethylethanolamine | 0.761 | 89.08387 | 90.09115 | HMDB0032231 | C04308 | C4H11NO | -2.16 | × | – |
| sn-glycero-3-Phosphoethanolamine | 0.762 | 215.05598 | 216.06324 | HMDB0059660 | C14180 | C5H14NO6P | 0.48 | – | × |
| Asparaginyl-Valine | 0.818 | 231.12148 | 232.12875 | HMDB0028744 | - | C9H17N3O4 | -1.85 | × | – |
| Glucose 1-phosphate | 0.821 | 260.02922 | 261.0365 | HMDB0001586 | C00103 | C6H13O9P | -1.9 | × | – |
| Imidazoleacetic acid | 0.905 | 126.04302 | 127.0503 | HMDB0002024 | - | C5H6N2O2 | 0.75 | – | × |
| Alanylproline | 0.960 | 186.1001 | 187.10738 | HMDB0028695 | - | C8H14N2O3 | -1.82 | × | – |
| N-Acetyl-L-histidine | 1.037 | 197.07973 | 198.0870 | HMDB0032055 | C02997 | C8H11N3O3 | -1.6 | × | – |
| gamma-Glutamylglutamic acid | 1.037 | 276.09607 | 277.10335 | HMDB0011737 | C05282 | C10H16N2O7 | 1.17 | – | × |
| Valine | 1.129 | 117.07874 | 118.08602 | HMDB0000883 | C00183 | C5H11NO2 | -2.05 | × | – |
| Nicotinamide | 1.131 | 122.04779 | 123.05506 | HMDB0001406 | C00153 | C6H6N2O | -1.85 | × | – |
| S-(Hydroxymethyl)glutathione | 1.139 | 337.09455 | 338.10188 | HMDB0004662 | - | C11H19N3O7S | 0.52 | – | × |
| 4-Guanidinobutanoic acid | 1.140 | 145.08518 | 146.09246 | HMDB0003464 | C01035 | C5H11N3O2 | 0.36 | – | × |
| Glutathione | 1.146 | 307.08387 | 308.09114 | HMDB0000125 | C00051 | C10H17N3O6S | 0.2 | – | × |
| Methionine | 1.157 | 149.0511 | 150.05837 | HMDB0000696 | C00073 | C5H11NO2S | 0.31 | – | × |
| Pyroglutamic Acid | 1.621 | 129.04236 | 130.04964 | HMDB0000267 | C01879 | C5H7NO3 | -1.81 | × | – |
| Tyrosine | 2.063 | 181.07394 | 182.08121 | HMDB0000158 | C00082 | C9H11NO3 | 0.24 | – | × |
| Glutathione oxidized | 2.308 | 612.15216 | 307.08336 | HMDB0003337 | C00127 | C20H32N6O12S2 | 0.32 | × | × |
| N-(1-Deoxy-1-fructosyl) leucine | 2.826 | 293.14701 | 294.15426 | HMDB0037840 | - | C12H23NO7 | -1.51 | × | – |
| Alanylleucin | 3.169 | 202.13134 | 203.13862 | HMDB0028691 | - | C9H18N2O3 | -1.98 | × | – |

**Table S8.** Pathways analysis. *P*-value is the original *p* value calculated from the enrichment analysis; Holm *P*-value is the *P*-value adjusted by Holm-Bonferroni method; the FDR is the *P*-value adjusted using False Discovery Rate; Impact is the pathway impact value calculated from pathway topology analysis.

| **Sample** | **Pathway Name** | **Match Status** | ***p*** | **-log(*p*)** | **Holm *p*** | **FDR** | **Impact** |
| --- | --- | --- | --- | --- | --- | --- | --- |
| *Salvia sclarea* | Glutathione metabolism | 2/28 | 0.0045154 | 2.3453 | 0.37929 | 0.37929 | 0.03407 |
| Valine, leucine and isoleucine biosynthesis | 1/8 | 0.03062 | 1.514 | 1 | 1 | 0 |
| Nicotinate and nicotinamide metabolism | 1/15 | 0.056767 | 1.2459 | 1 | 1 | 0.1943 |
| Pentose and glucuronate interconversions | 1/18 | 0.067792 | 1.1688 | 1 | 1 | 0 |
| Starch and sucrose metabolism | 1/18 | 0.067792 | 1.1688 | 1 | 1 | 0.13486 |
| Pantothenate and CoA biosynthesis | 1/19 | 0.071443 | 1.146 | 1 | 1 | 0 |
| Glycolysis / Gluconeogenesis | 1/26 | 0.096667 | 1.0147 | 1 | 1 | 0 |
| Galactose metabolism | 1/27 | 0.10022 | 0.99903 | 1 | 1 | 0.00995 |
| Glycerophospholipid metabolism | 1/36 | 0.13171 | 0.88038 | 1 | 1 | 0.00446 |
| Amino sugar and nucleotide sugar metabolism | 1/37 | 0.13515 | 0.86918 | 1 | 1 | 0.08431 |
| Valine, leucine and isoleucine degradation | 1/40 | 0.14541 | 0.83742 | 1 | 1 | 0 |
| Aminoacyl-tRNA biosynthesis | 1/48 | 0.17226 | 0.76382 | 1 | 1 | 0 |
| *Salvia dominica* | Aminoacyl-tRNA biosynthesis | 3/48 | 0.0020554 | 2.6871 | 0.17265 | 0.17265 | 0 |
| Glutathione metabolism | 2/28 | 0.010479 | 1.9797 | 0.86973 | 0.40368 | 0.28294 |
| Cysteine and methionine metabolism | 2/33 | 0.014417 | 1.8411 | 1 | 0.40368 | 0.283 |
| Phenylalanine, tyrosine and tryptophan biosynthesis | 1/4 | 0.023046 | 1.6374 | 1 | 0.48148 | 0.5 |
| D-Glutamine and D-glutamate metabolism | 1/6 | 0.034392 | 1.4635 | 1 | 0.48148 | 0 |
| Nitrogen metabolism | 1/6 | 0.034392 | 1.4635 | 1 | 0.48148 | 0 |
| Taurine and hypotaurine metabolism | 1/8 | 0.04562 | 1.3408 | 1 | 0.52949 | 0.28571 |
| Ubiquinone and other terpenoid-quinone biosynthesis | 1/9 | 0.05119 | 1.2908 | 1 | 0.52949 | 0 |
| Phenylalanine metabolism | 1/10 | 0.056731 | 1.2462 | 1 | 0.52949 | 0 |
| Arginine biosynthesis | 1/14 | 0.07861 | 1.1045 | 1 | 0.66033 | 0 |
| Histidine metabolism | 1/16 | 0.08938 | 1.0488 | 1 | 0.68254 | 0 |
| Alanine, aspartate and glutamate metabolism | 1/28 | 0.15168 | 0.81908 | 1 | 1 | 0.11378 |
| Glyoxylate and dicarboxylate metabolism | 1/32 | 0.17159 | 0.76552 | 1 | 1 | 0 |
| Glycine, serine and threonine metabolism | 1/33 | 0.1765 | 0.75326 | 1 | 1 | 0 |
| Arginine and proline metabolism | 1/38 | 0.20067 | 0.69752 | 1 | 1 | 0 |
| Pyrimidine metabolism | 1/39 | 0.20543 | 0.68734 | 1 | 1 | 0 |
| Tyrosine metabolism | 1/42 | 0.21955 | 0.65847 | 1 | 1 | 0.13972 |
| Purine metabolism | 1/65 | 0.32062 | 0.494 | 1 | 1 | 0 |
